# Supplementary material for: Biological and chemical guided isolation of 3,4-secograyanane diterpenoids from the roots of Pieris formosa
Source: Royal Society of Chemistry journal article supplement (doi:10.1039/c7ra08635k), 2017-01-01
Supplement: c7ra08635k1.pdf [file c7ra08635k1.pdf]

Electronic Supplementary Material (ESI) for RSC Advances.  
This journal is © The Royal Society of Chemistry 2017

**Biological and Chemical Guided Isolation of  
3,4-Secograyanane Diterpenoids from the Roots of  
*Pieris formosa***

Chang-Shan Niu, Yong Li, Yun-Bao Liu, Shuang-Gang Ma, Fei Liu, Li  
Li, Song Xu, Xiao-Jing Wang, Sheng Liu, Ru-Bing Wang, Jing Qu\*, and  
Shi-Shan Yu\*

State Key Laboratory of Bioactive Substance and Function of Natural Medicines,  
Institute of Materia Medica, Chinese Academy of Medical Sciences and Peking Union  
Medical College, Beijing 100050, China.

\*To whom correspondence should be addressed. E-mail: yushishan@imm.ac.cn. Tel:  
+86-10-63165324. Fax:+86-10-63016757.

# Supporting Information

## List of Contents

|                                                                                                                                 |    |
|---------------------------------------------------------------------------------------------------------------------------------|----|
| <b>Figure S1.</b> Online HPLC/UV/ESIMS <sup>2</sup> analyses of fraction D1a.....                                               | 8  |
| <b>Figure S2.</b> Online HPLC/UV/ESIMS <sup>2</sup> analyses of fraction D2a.....                                               | 8  |
| <b>Figure S3.</b> Online HPLC/UV/ESIMS <sup>2</sup> analyses of fraction D2b.....                                               | 8  |
| <b>Figure S4.</b> Online HPLC/UV/ESIMS <sup>2</sup> analyses of fraction E1a.....                                               | 9  |
| <b>Figure S5.</b> Online HPLC/UV/ESIMS <sup>2</sup> analyses of fraction E1b.....                                               | 9  |
| <b>Figure S6.</b> Online HPLC/UV/ESIMS <sup>2</sup> analyses of fraction E2a.....                                               | 9  |
| <b>Figure S7.</b> IR spectrum of <b>1</b> .....                                                                                 | 10 |
| <b>Figure S8.</b> (+)-HRESIMS data of <b>1</b> .....                                                                            | 10 |
| <b>Figure S9.</b> <sup>1</sup> H NMR spectrum of <b>1</b> (500 MHz, in C <sub>5</sub> D <sub>5</sub> N).....                    | 10 |
| <b>Figure S10.</b> <sup>13</sup> C NMR spectrum of <b>1</b> (125 MHz, in C <sub>5</sub> D <sub>5</sub> N) .....                 | 11 |
| <b>Figure S11.</b> DEPT spectrum of <b>1</b> (125 MHz, in C <sub>5</sub> D <sub>5</sub> N).....                                 | 11 |
| <b>Figure S12.</b> <sup>1</sup> H- <sup>1</sup> H COSY spectrum of <b>1</b> (500 MHz, in C <sub>5</sub> D <sub>5</sub> N) ..... | 12 |
| <b>Figure S13.</b> HSQC spectrum of <b>1</b> (500 MHz, in C <sub>5</sub> D <sub>5</sub> N).....                                 | 12 |
| <b>Figure S14.</b> HMBC spectrum of <b>1</b> (500 MHz, in C <sub>5</sub> D <sub>5</sub> N) .....                                | 13 |
| <b>Figure S15.</b> NOESY spectrum of <b>1</b> (500 MHz, in C <sub>5</sub> D <sub>5</sub> N) .....                               | 13 |
| <b>Table S1.</b> Crystal data and structure refinement for <b>1</b> .....                                                       | 14 |
| <b>Figure S16.</b> IR spectrum of <b>2</b> .....                                                                                | 14 |
| <b>Figure S17.</b> (+)-HRESIMS data of <b>2</b> .....                                                                           | 15 |
| <b>Figure S18.</b> <sup>1</sup> H NMR spectrum of <b>2</b> (500 MHz, in C <sub>5</sub> D <sub>5</sub> N) .....                  | 15 |
| <b>Figure S19.</b> <sup>13</sup> C NMR spectrum of <b>2</b> (125 MHz, in C <sub>5</sub> D <sub>5</sub> N) .....                 | 15 |
| <b>Figure S20.</b> DEPT spectrum of <b>2</b> (125 MHz, in C <sub>5</sub> D <sub>5</sub> N) .....                                | 16 |
| <b>Figure S21.</b> <sup>1</sup> H- <sup>1</sup> H COSY spectrum of <b>2</b> (500 MHz, in C <sub>5</sub> D <sub>5</sub> N) ..... | 16 |
| <b>Figure S22.</b> HSQC spectrum of <b>2</b> (500 MHz, in C <sub>5</sub> D <sub>5</sub> N) .....                                | 17 |
| <b>Figure S23.</b> HMBC spectrum of <b>2</b> (500 MHz, in C <sub>5</sub> D <sub>5</sub> N) .....                                | 17 |
| <b>Figure S24.</b> NOESY spectrum of <b>2</b> (500 MHz, in C <sub>5</sub> D <sub>5</sub> N) .....                               | 18 |
| <b>Figure S25.</b> IR spectrum of <b>3</b> .....                                                                                | 18 |
| <b>Figure S26.</b> (+)-HRESIMS data of <b>3</b> .....                                                                           | 19 |

|                                                                                                                              |    |
|------------------------------------------------------------------------------------------------------------------------------|----|
| <b>Figure S27.</b> $^1\text{H}$ NMR spectrum of <b>3</b> (600 MHz, in $\text{C}_5\text{D}_5\text{N}$ ) .....                 | 19 |
| <b>Figure S28.</b> $^{13}\text{C}$ NMR spectrum of <b>3</b> (150 MHz, in $\text{C}_5\text{D}_5\text{N}$ ).....               | 19 |
| <b>Figure S29.</b> DEPT spectrum of <b>3</b> (150 MHz, in $\text{C}_5\text{D}_5\text{N}$ ).....                              | 20 |
| <b>Figure S30.</b> $^1\text{H}$ - $^1\text{H}$ COSY spectrum of <b>3</b> (600 MHz, in $\text{C}_5\text{D}_5\text{N}$ ) ..... | 20 |
| <b>Figure S31.</b> HSQC spectrum of <b>3</b> (600 MHz, in $\text{C}_5\text{D}_5\text{N}$ ) .....                             | 21 |
| <b>Figure S32.</b> HMBC spectrum of <b>3</b> (600 MHz, in $\text{C}_5\text{D}_5\text{N}$ ) .....                             | 21 |
| <b>Figure S33.</b> NOESY spectrum of <b>3</b> (600 MHz, in $\text{C}_5\text{D}_5\text{N}$ ) .....                            | 22 |
| <b>Figure S34.</b> IR spectrum of <b>4</b> .....                                                                             | 22 |
| <b>Figure S35.</b> (+)-HRESIMS data of <b>4</b> .....                                                                        | 22 |
| <b>Figure S36.</b> $^1\text{H}$ NMR spectrum of <b>4</b> (500 MHz, in $\text{C}_5\text{D}_5\text{N}$ ) .....                 | 23 |
| <b>Figure S37.</b> $^{13}\text{C}$ NMR spectrum of <b>4</b> (125 MHz, in $\text{C}_5\text{D}_5\text{N}$ ) .....              | 23 |
| <b>Figure S38.</b> DEPT spectrum of <b>4</b> (125 MHz, in $\text{C}_5\text{D}_5\text{N}$ ) .....                             | 24 |
| <b>Figure S39.</b> $^1\text{H}$ - $^1\text{H}$ COSY spectrum of <b>4</b> (500 MHz, in $\text{C}_5\text{D}_5\text{N}$ ) ..... | 24 |
| <b>Figure S40.</b> HSQC spectrum of <b>4</b> (500 MHz, in $\text{C}_5\text{D}_5\text{N}$ ) .....                             | 25 |
| <b>Figure S41.</b> HMBC spectrum of <b>4</b> (500 MHz, in $\text{C}_5\text{D}_5\text{N}$ ) .....                             | 25 |
| <b>Figure S42.</b> NOESY spectrum of <b>4</b> (500 MHz, in $\text{C}_5\text{D}_5\text{N}$ ) .....                            | 26 |
| <b>Figure S43.</b> IR spectrum of <b>5</b> .....                                                                             | 26 |
| <b>Figure S44.</b> (+)-HRESIMS data of <b>5</b> .....                                                                        | 26 |
| <b>Figure S45.</b> $^1\text{H}$ NMR spectrum of <b>5</b> (600 MHz, in $\text{C}_5\text{D}_5\text{N}$ ) .....                 | 27 |
| <b>Figure S46.</b> $^{13}\text{C}$ NMR spectrum of <b>5</b> (150 MHz, in $\text{C}_5\text{D}_5\text{N}$ ) .....              | 27 |
| <b>Figure S47.</b> DEPT spectrum of <b>5</b> (150 MHz, in $\text{C}_5\text{D}_5\text{N}$ ) .....                             | 28 |
| <b>Figure S48.</b> $^1\text{H}$ - $^1\text{H}$ COSY spectrum of <b>5</b> (600 MHz, in $\text{C}_5\text{D}_5\text{N}$ ) ..... | 28 |
| <b>Figure S49.</b> HSQC spectrum of <b>5</b> (600 MHz, in $\text{C}_5\text{D}_5\text{N}$ ) .....                             | 29 |
| <b>Figure S50.</b> HMBC spectrum of <b>5</b> (600 MHz, in $\text{C}_5\text{D}_5\text{N}$ ) .....                             | 29 |
| <b>Figure S51.</b> NOESY spectrum of <b>5</b> (600 MHz, in $\text{C}_5\text{D}_5\text{N}$ ) .....                            | 30 |
| <b>Figure S52.</b> IR spectrum of <b>6</b> .....                                                                             | 30 |
| <b>Figure S53.</b> (+)-HRESIMS data of <b>6</b> .....                                                                        | 30 |
| <b>Figure S54.</b> $^1\text{H}$ NMR spectrum of <b>6</b> (600 MHz, in $\text{C}_5\text{D}_5\text{N}$ ) .....                 | 31 |
| <b>Figure S55.</b> $^{13}\text{C}$ NMR spectrum of <b>6</b> (150 MHz, in $\text{C}_5\text{D}_5\text{N}$ ) .....              | 31 |
| <b>Figure S56.</b> DEPT spectrum of <b>6</b> (150 MHz, in $\text{C}_5\text{D}_5\text{N}$ ) .....                             | 32 |

|                                                                                                                              |    |
|------------------------------------------------------------------------------------------------------------------------------|----|
| <b>Figure S57.</b> $^1\text{H}$ - $^1\text{H}$ COSY spectrum of <b>6</b> (600 MHz, in $\text{C}_5\text{D}_5\text{N}$ ) ..... | 32 |
| <b>Figure S58.</b> HSQC spectrum of <b>6</b> (600 MHz, in $\text{C}_5\text{D}_5\text{N}$ ) .....                             | 33 |
| <b>Figure S59.</b> HMBC spectrum of <b>6</b> (600 MHz, in $\text{C}_5\text{D}_5\text{N}$ ) .....                             | 33 |
| <b>Figure S60.</b> NOESY spectrum of <b>6</b> (600 MHz, in $\text{C}_5\text{D}_5\text{N}$ ).....                             | 34 |
| <b>Figure S61.</b> IR spectrum of <b>7</b> .....                                                                             | 34 |
| <b>Figure S62.</b> (+)-HRESIMS data of <b>7</b> .....                                                                        | 34 |
| <b>Figure S63.</b> $^1\text{H}$ NMR spectrum of <b>7</b> (500 MHz, in $\text{C}_5\text{D}_5\text{N}$ ) .....                 | 35 |
| <b>Figure S64.</b> $^{13}\text{C}$ NMR spectrum of <b>7</b> (125 MHz, in $\text{C}_5\text{D}_5\text{N}$ ) .....              | 35 |
| <b>Figure S65.</b> DEPT spectrum of <b>7</b> (125 MHz, in $\text{C}_5\text{D}_5\text{N}$ ) .....                             | 36 |
| <b>Figure S66.</b> $^1\text{H}$ - $^1\text{H}$ COSY spectrum of <b>7</b> (500 MHz, in $\text{C}_5\text{D}_5\text{N}$ ) ..... | 36 |
| <b>Figure S67.</b> HSQC spectrum of <b>7</b> 500 MHz, in $\text{C}_5\text{D}_5\text{N}$ ) .....                              | 37 |
| <b>Figure S68.</b> HMBC spectrum of <b>7</b> (500 MHz, in $\text{C}_5\text{D}_5\text{N}$ ) .....                             | 37 |
| <b>Figure S69.</b> NOESY spectrum of <b>7</b> (500 MHz, in $\text{C}_5\text{D}_5\text{N}$ ) .....                            | 38 |
| <b>Table S2.</b> Crystal data and structure refinement for <b>7</b> .....                                                    | 38 |
| <b>Figure S70.</b> IR spectrum of <b>8</b> .....                                                                             | 39 |
| <b>Figure S71.</b> (+)-HRESIMS data of <b>8</b> .....                                                                        | 39 |
| <b>Figure S72.</b> $^1\text{H}$ NMR spectrum of <b>8</b> (600 MHz, in $\text{C}_5\text{D}_5\text{N}$ ) .....                 | 39 |
| <b>Figure S73.</b> $^{13}\text{C}$ NMR spectrum of <b>8</b> (150 MHz, in $\text{C}_5\text{D}_5\text{N}$ ) .....              | 40 |
| <b>Figure S74.</b> DEPT spectrum of <b>8</b> (150 MHz, in $\text{C}_5\text{D}_5\text{N}$ ) .....                             | 40 |
| <b>Figure S75.</b> $^1\text{H}$ - $^1\text{H}$ COSY spectrum of <b>8</b> (600 MHz, in $\text{C}_5\text{D}_5\text{N}$ ) ..... | 41 |
| <b>Figure S76.</b> HSQC spectrum of <b>8</b> (600 MHz, in $\text{C}_5\text{D}_5\text{N}$ ) .....                             | 41 |
| <b>Figure S77.</b> HMBC spectrum of <b>8</b> (600 MHz, in $\text{C}_5\text{D}_5\text{N}$ ) .....                             | 42 |
| <b>Figure S78.</b> HMBC spectrum of <b>8</b> (800 MHz, in $\text{C}_5\text{D}_5\text{N}$ ) .....                             | 42 |
| <b>Figure S79.</b> NOESY spectrum of <b>8</b> (600 MHz, in $\text{C}_5\text{D}_5\text{N}$ ) .....                            | 43 |
| <b>Figure S80.</b> IR spectrum of <b>9</b> .....                                                                             | 43 |
| <b>Figure S81.</b> (+)-HRESIMS data of <b>9</b> .....                                                                        | 44 |
| <b>Figure S82.</b> $^1\text{H}$ NMR spectrum of <b>9</b> (600 MHz, in $\text{C}_5\text{D}_5\text{N}$ ) .....                 | 44 |
| <b>Figure S83.</b> $^{13}\text{C}$ NMR spectrum of <b>9</b> (150 MHz, in $\text{C}_5\text{D}_5\text{N}$ ) .....              | 45 |
| <b>Figure S84.</b> DEPT spectrum of <b>9</b> (150 MHz, in $\text{C}_5\text{D}_5\text{N}$ ) .....                             | 45 |
| <b>Figure S85.</b> $^1\text{H}$ - $^1\text{H}$ COSY spectrum of <b>9</b> (600 MHz, in $\text{C}_5\text{D}_5\text{N}$ ) ..... | 46 |

|                                                                                                                                   |    |
|-----------------------------------------------------------------------------------------------------------------------------------|----|
| <b>Figure S86.</b> HSQC spectrum of <b>9</b> (600 MHz, in C <sub>5</sub> D <sub>5</sub> N) .....                                  | 46 |
| <b>Figure S87.</b> HMBC spectrum of <b>9</b> (600 MHz, in C <sub>5</sub> D <sub>5</sub> N) .....                                  | 47 |
| <b>Figure S88.</b> NOESY spectrum of <b>9</b> (600 MHz, in C <sub>5</sub> D <sub>5</sub> N) .....                                 | 47 |
| <b>Figure S89.</b> IR spectrum of <b>10</b> .....                                                                                 | 48 |
| <b>Figure S90.</b> (+)-HRESIMS data of <b>10</b> .....                                                                            | 48 |
| <b>Figure S91.</b> <sup>1</sup> H NMR spectrum of <b>10</b> (600 MHz, in C <sub>5</sub> D <sub>5</sub> N) .....                   | 49 |
| <b>Figure S92.</b> <sup>13</sup> C NMR spectrum of <b>10</b> (150 MHz, in C <sub>5</sub> D <sub>5</sub> N) .....                  | 49 |
| <b>Figure S93.</b> DEPT spectrum of <b>10</b> (150 MHz, in C <sub>5</sub> D <sub>5</sub> N) .....                                 | 49 |
| <b>Figure S94.</b> <sup>1</sup> H- <sup>1</sup> H COSY spectrum of <b>10</b> (600 MHz, in C <sub>5</sub> D <sub>5</sub> N) .....  | 50 |
| <b>Figure S95.</b> HSQC spectrum of <b>10</b> (600 MHz, in C <sub>5</sub> D <sub>5</sub> N) .....                                 | 50 |
| <b>Figure S96.</b> HMBC spectrum of <b>10</b> (600 MHz, in C <sub>5</sub> D <sub>5</sub> N) .....                                 | 51 |
| <b>Figure S97.</b> NOESY spectrum of <b>10</b> (600 MHz, in C <sub>5</sub> D <sub>5</sub> N) .....                                | 51 |
| <b>Figure S98.</b> IR spectrum of <b>11</b> .....                                                                                 | 52 |
| <b>Figure S99.</b> (+)-HRESIMS data of <b>11</b> .....                                                                            | 52 |
| <b>Figure S100.</b> <sup>1</sup> H NMR spectrum of <b>11</b> (500 MHz, in C <sub>5</sub> D <sub>5</sub> N) .....                  | 52 |
| <b>Figure S101.</b> <sup>13</sup> C NMR spectrum of <b>11</b> (125 MHz, in C <sub>5</sub> D <sub>5</sub> N) .....                 | 53 |
| <b>Figure S102.</b> DEPT spectrum of <b>11</b> (125 MHz, in C <sub>5</sub> D <sub>5</sub> N) .....                                | 53 |
| <b>Figure S103.</b> <sup>1</sup> H- <sup>1</sup> H COSY spectrum of <b>11</b> (500 MHz, in C <sub>5</sub> D <sub>5</sub> N) ..... | 54 |
| <b>Figure S104.</b> HSQC spectrum of <b>11</b> (500 MHz, in C <sub>5</sub> D <sub>5</sub> N) .....                                | 54 |
| <b>Figure S105.</b> HMBC spectrum of <b>11</b> (500 MHz, in C <sub>5</sub> D <sub>5</sub> N) .....                                | 55 |
| <b>Figure S106.</b> NOESY spectrum of <b>11</b> (500 MHz, in C <sub>5</sub> D <sub>5</sub> N) .....                               | 55 |
| <b>Table S3.</b> Crystal data and structure refinement for <b>11</b> . .....                                                      | 56 |
| <b>Figure S107.</b> IR spectrum of <b>12</b> .....                                                                                | 56 |
| <b>Figure S108.</b> (+)-HRESIMS data of <b>12</b> .....                                                                           | 57 |
| <b>Figure S109.</b> <sup>1</sup> H NMR spectrum of <b>12</b> (600 MHz, in C <sub>5</sub> D <sub>5</sub> N) .....                  | 57 |
| <b>Figure S110.</b> <sup>13</sup> C NMR spectrum of <b>12</b> (150 MHz, in C <sub>5</sub> D <sub>5</sub> N) .....                 | 58 |
| <b>Figure S111.</b> DEPT spectrum of <b>12</b> (150 MHz, in C <sub>5</sub> D <sub>5</sub> N) .....                                | 58 |
| <b>Figure S112.</b> <sup>1</sup> H- <sup>1</sup> H COSY spectrum of <b>12</b> (600 MHz, in C <sub>5</sub> D <sub>5</sub> N) ..... | 59 |
| <b>Figure S113.</b> HSQC spectrum of <b>12</b> (600 MHz, in C <sub>5</sub> D <sub>5</sub> N) .....                                | 59 |
| <b>Figure S114.</b> HMBC spectrum of <b>12</b> (600 MHz, in C <sub>5</sub> D <sub>5</sub> N) .....                                | 60 |

|                                                                                                                                   |    |
|-----------------------------------------------------------------------------------------------------------------------------------|----|
| <b>Figure S115.</b> NOESY spectrum of <b>12</b> (600 MHz, in C <sub>5</sub> D <sub>5</sub> N) .....                               | 60 |
| <b>Figure S116.</b> IR spectrum of <b>13</b> .....                                                                                | 61 |
| <b>Figure S117.</b> (+)-HRESIMS data of <b>13</b> .....                                                                           | 61 |
| <b>Figure S118.</b> <sup>1</sup> H NMR spectrum of <b>13</b> (600 MHz, in C <sub>5</sub> D <sub>5</sub> N) .....                  | 61 |
| <b>Figure S119.</b> <sup>13</sup> C NMR spectrum of <b>13</b> (150 MHz, in C <sub>5</sub> D <sub>5</sub> N) .....                 | 62 |
| <b>Figure S120.</b> DEPT spectrum of <b>13</b> (150 MHz, in C <sub>5</sub> D <sub>5</sub> N) .....                                | 62 |
| <b>Figure S121.</b> <sup>1</sup> H- <sup>1</sup> H COSY spectrum of <b>13</b> (600 MHz, in C <sub>5</sub> D <sub>5</sub> N) ..... | 63 |
| <b>Figure S122.</b> HSQC spectrum of <b>13</b> (600 MHz, in C <sub>5</sub> D <sub>5</sub> N) .....                                | 63 |
| <b>Figure S123.</b> HMBC spectrum of <b>13</b> (600 MHz, in C <sub>5</sub> D <sub>5</sub> N) .....                                | 64 |
| <b>Figure S124.</b> NOESY spectrum of <b>13</b> (600 MHz, in C <sub>5</sub> D <sub>5</sub> N) .....                               | 64 |
| <b>Figure S125.</b> IR spectrum of <b>14</b> .....                                                                                | 65 |
| <b>Figure S126.</b> (+)-HRESIMS data of <b>14</b> .....                                                                           | 65 |
| <b>Figure S127.</b> <sup>1</sup> H NMR spectrum of <b>14</b> (600 MHz, in C <sub>5</sub> D <sub>5</sub> N) .....                  | 65 |
| <b>Figure S128.</b> <sup>13</sup> C NMR spectrum of <b>14</b> (150 MHz, in C <sub>5</sub> D <sub>5</sub> N) .....                 | 66 |
| <b>Figure S129.</b> DEPT spectrum of <b>14</b> (150 MHz, in C <sub>5</sub> D <sub>5</sub> N) .....                                | 66 |
| <b>Figure S130.</b> <sup>1</sup> H- <sup>1</sup> H COSY spectrum of <b>14</b> (600 MHz, in C <sub>5</sub> D <sub>5</sub> N) ..... | 67 |
| <b>Figure S131.</b> HSQC spectrum of <b>14</b> (600 MHz, in C <sub>5</sub> D <sub>5</sub> N) .....                                | 67 |
| <b>Figure S132.</b> HMBC spectrum of <b>14</b> (600 MHz, in C <sub>5</sub> D <sub>5</sub> N) .....                                | 68 |
| <b>Figure S133.</b> NOESY spectrum of <b>14</b> (600 MHz, in C <sub>5</sub> D <sub>5</sub> N) .....                               | 68 |
| <b>Table S4.</b> Crystal data and structure refinement for <b>14</b> .....                                                        | 69 |
| <b>Figure S134.</b> IR spectrum of <b>15</b> .....                                                                                | 69 |
| <b>Figure S135.</b> (+)-HRESIMS data of <b>15</b> .....                                                                           | 70 |
| <b>Figure S136.</b> <sup>1</sup> H NMR spectrum of <b>15</b> (600 MHz, in C <sub>5</sub> D <sub>5</sub> N) .....                  | 70 |
| <b>Figure S137.</b> <sup>13</sup> C NMR spectrum of <b>15</b> (150 MHz, in C <sub>5</sub> D <sub>5</sub> N) .....                 | 71 |
| <b>Figure S138.</b> DEPT spectrum of <b>15</b> (150 MHz, in C <sub>5</sub> D <sub>5</sub> N) .....                                | 71 |
| <b>Figure S139.</b> <sup>1</sup> H- <sup>1</sup> H COSY spectrum of <b>15</b> (600 MHz, in C <sub>5</sub> D <sub>5</sub> N) ..... | 72 |
| <b>Figure S140.</b> HSQC spectrum of <b>15</b> (600 MHz, in C <sub>5</sub> D <sub>5</sub> N) .....                                | 72 |
| <b>Figure S141.</b> HMBC spectrum of <b>15</b> (600 MHz, in C <sub>5</sub> D <sub>5</sub> N) .....                                | 73 |
| <b>Figure S142.</b> NOESY spectrum of <b>15</b> (600 MHz, in C <sub>5</sub> D <sub>5</sub> N) .....                               | 73 |
| <b>Figure S143.</b> IR spectrum of <b>16</b> .....                                                                                | 74 |

|                                                                                                                                   |    |
|-----------------------------------------------------------------------------------------------------------------------------------|----|
| <b>Figure S144.</b> (+)-HRESIMS data of <b>16</b> .....                                                                           | 74 |
| <b>Figure S145.</b> <sup>1</sup> H NMR spectrum of <b>16</b> (600 MHz, in C <sub>5</sub> D <sub>5</sub> N) .....                  | 74 |
| <b>Figure S146.</b> <sup>13</sup> C NMR spectrum of <b>16</b> (150 MHz, in C <sub>5</sub> D <sub>5</sub> N) .....                 | 75 |
| <b>Figure S147.</b> DEPT spectrum of <b>16</b> (150 MHz, in C <sub>5</sub> D <sub>5</sub> N) .....                                | 75 |
| <b>Figure S148.</b> <sup>1</sup> H- <sup>1</sup> H COSY spectrum of <b>16</b> (600 MHz, in C <sub>5</sub> D <sub>5</sub> N) ..... | 76 |
| <b>Figure S149.</b> HSQC spectrum of <b>16</b> (600 MHz, in C <sub>5</sub> D <sub>5</sub> N).....                                 | 76 |
| <b>Figure S150.</b> HMBC spectrum of <b>16</b> (600 MHz, in C <sub>5</sub> D <sub>5</sub> N) .....                                | 77 |
| <b>Figure S151.</b> NOESY spectrum of <b>16</b> (600 MHz, in C <sub>5</sub> D <sub>5</sub> N) .....                               | 77 |
| <b>Figure S152.</b> IR spectrum of <b>17</b> .....                                                                                | 78 |
| <b>Figure S153.</b> (+)-HRESIMS data of <b>17</b> .....                                                                           | 78 |
| <b>Figure S154.</b> <sup>1</sup> H NMR spectrum of <b>17</b> (600 MHz, in C <sub>5</sub> D <sub>5</sub> N) .....                  | 78 |
| <b>Figure S155.</b> <sup>13</sup> C NMR spectrum of <b>17</b> (150 MHz, in C <sub>5</sub> D <sub>5</sub> N) .....                 | 79 |
| <b>Figure S156.</b> DEPT spectrum of <b>17</b> (150 MHz, in C <sub>5</sub> D <sub>5</sub> N) .....                                | 79 |
| <b>Figure S157.</b> <sup>1</sup> H- <sup>1</sup> H COSY spectrum of <b>17</b> (600 MHz, in C <sub>5</sub> D <sub>5</sub> N) ..... | 80 |
| <b>Figure S158.</b> HSQC spectrum of <b>17</b> (600 MHz, in C <sub>5</sub> D <sub>5</sub> N) .....                                | 80 |
| <b>Figure S159.</b> HMBC spectrum of <b>17</b> (600 MHz, in C <sub>5</sub> D <sub>5</sub> N) .....                                | 81 |
| <b>Figure S160.</b> NOESY spectrum of <b>17</b> (600 MHz, in C <sub>5</sub> D <sub>5</sub> N) .....                               | 81 |

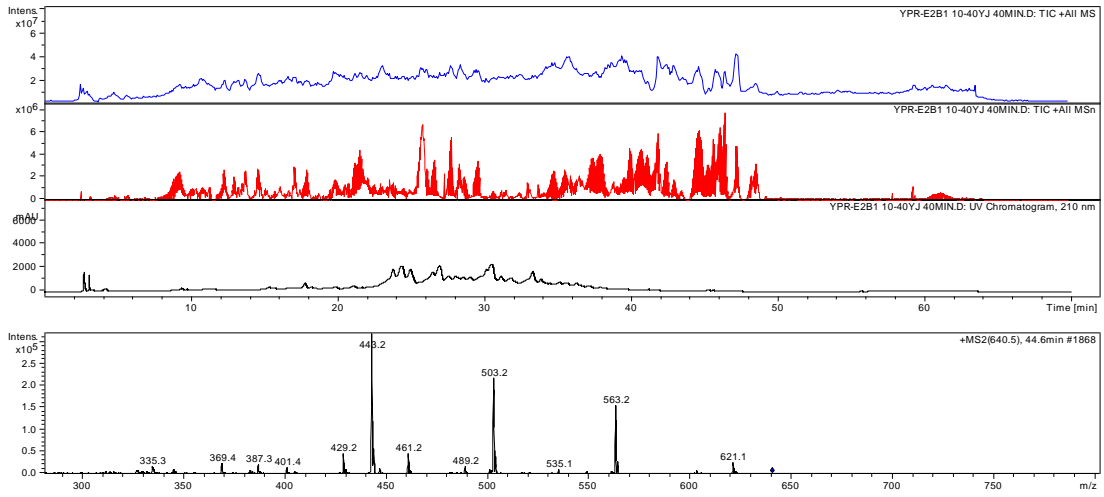

**Figure S1.** Online HPLC/UV/ESI-MS<sup>2</sup> analyses of fraction D1a

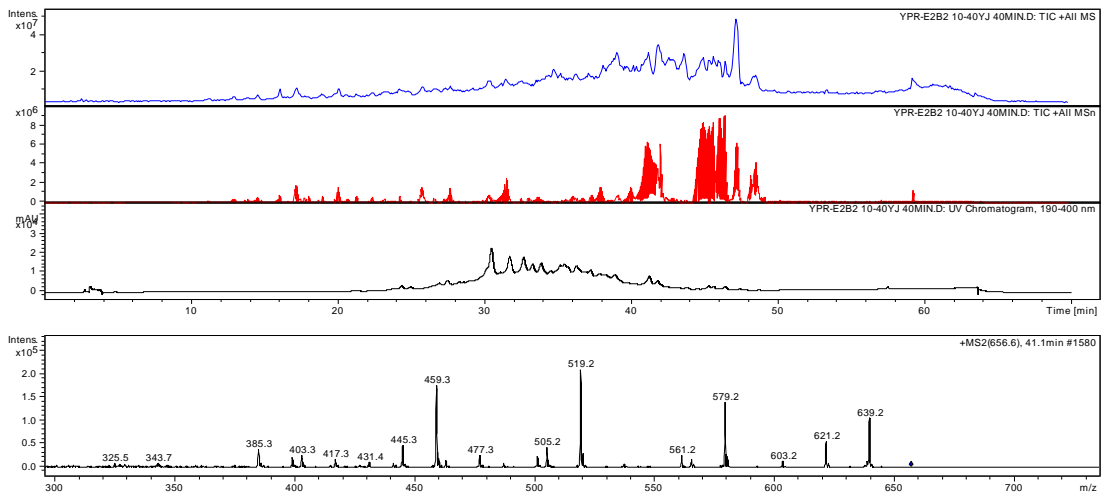

**Figure S2.** Online HPLC/UV/ESI-MS<sup>2</sup> analyses of fraction D2a

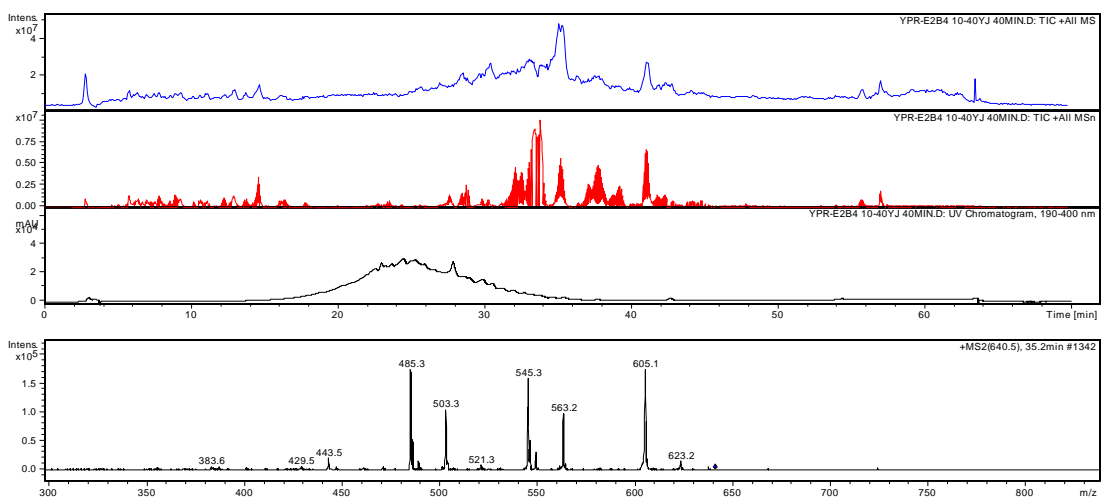

**Figure S3.** Online HPLC/UV/ESI-MS<sup>2</sup> analyses of fraction D2b



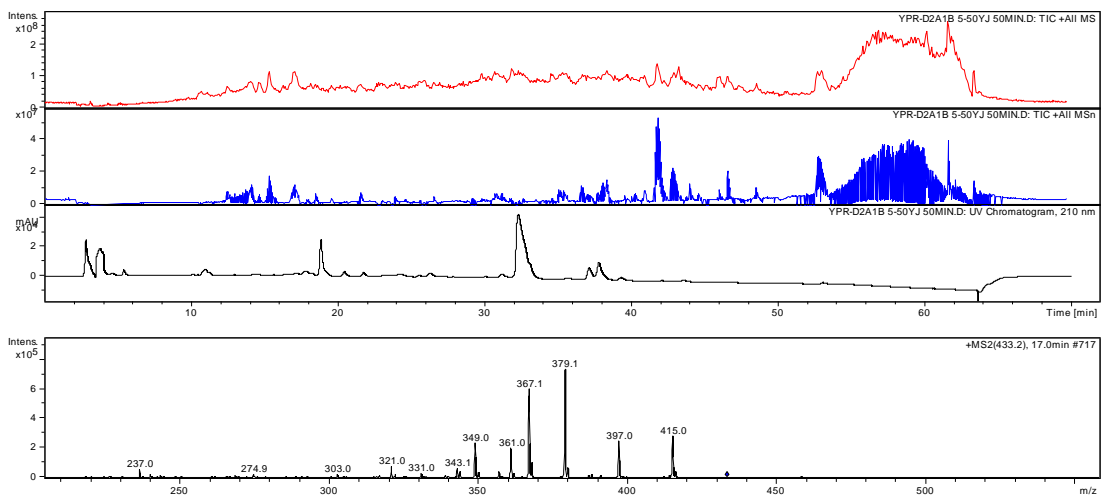

**Figure S4.** Online HPLC/UV/ESIMS<sup>2</sup> analyses of fraction E1a

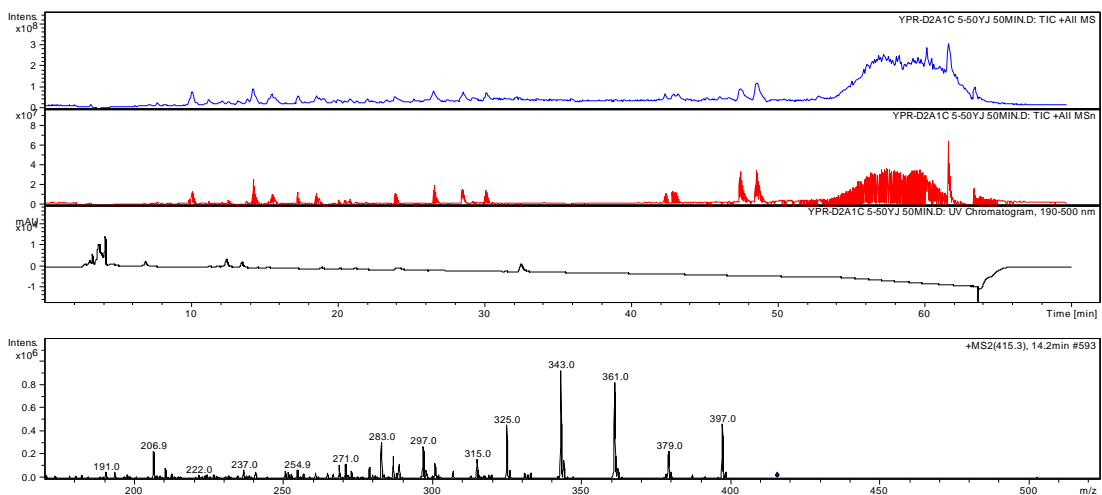

**Figure S5.** Online HPLC/UV/ESIMS<sup>2</sup> analyses of fraction E1b

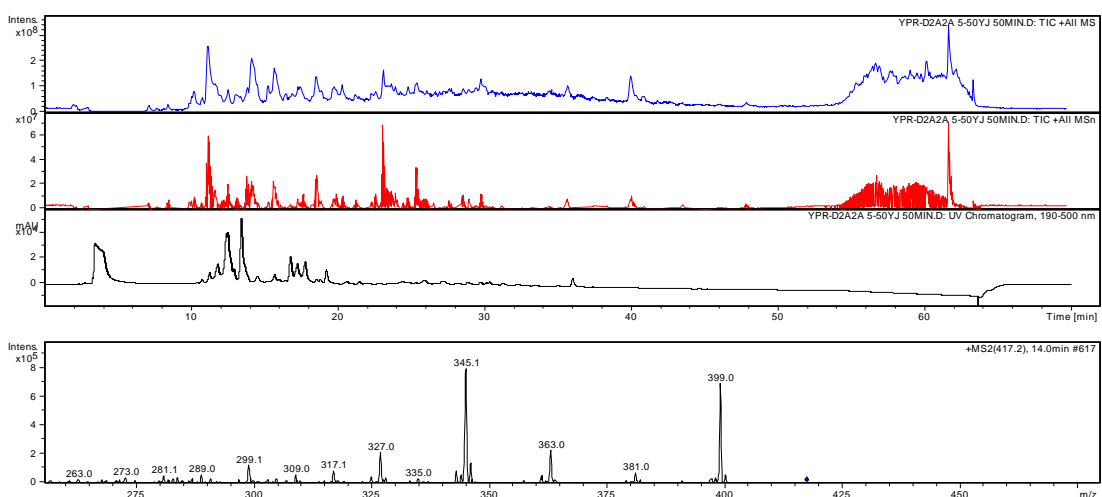

**Figure S6.** Online HPLC/UV/ESIMS<sup>2</sup> analyses of fraction E2a

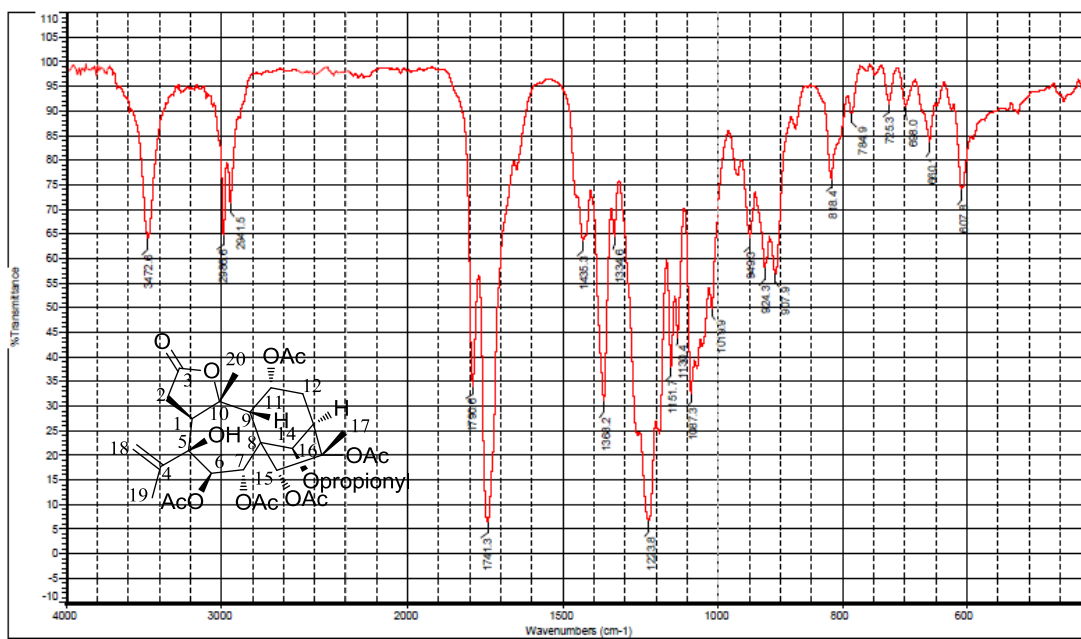

Figure S7. IR spectrum of **1**

MS Formula Results: + Scan (7.193 min) Sub (2015050501.d)

| m/z      | Ion                 | Formula        | Abundance |
|----------|---------------------|----------------|-----------|
| 703.2568 | (M+Na) <sup>+</sup> | C33 H44 Na O15 | 82303.1   |

  

| Best                                | Formula (M)    | Ion Formula       | Score | Cross Sec | Mass     | Calc Mass | Calc m/z | Diff (ppm) | Ads Diff (ppm) | Mass Match | Abund Match | Spacing Match | List |
|-------------------------------------|----------------|-------------------|-------|-----------|----------|-----------|----------|------------|----------------|------------|-------------|---------------|------|
| <input checked="" type="checkbox"/> | C33 H44 O15    | C33 H44 Na O15    | 99.72 |           | 680.2676 | 680.2688  | 703.2572 | 0.64       | 0.64           | 99.99      | 99.24       | 99.75         | 12   |
| <input type="checkbox"/>            | C46 H36 N2 O4  | C46 H36 N2 Na O4  | 98.52 |           | 680.2676 | 680.2675  | 703.2567 | -0.13      | 0.13           | 100        | 95.1        | 99.67         | 30   |
| <input type="checkbox"/>            | C28 H44 N2 O17 | C28 H44 N2 Na O17 | 98.45 |           | 680.2676 | 680.2684  | 703.2532 | -5.29      | 5.29           | 99.07      | 96.28       | 99.8          | 8    |
| <input type="checkbox"/>            | C51 H36 O2     | C51 H36 Na O2     | 96.87 |           | 680.2676 | 680.2715  | 703.2608 | 5.8        | 5.8            | 96.88      | 91.24       | 99.63         | 34   |

Figure S8. (+)-HRESIMS data of **1**

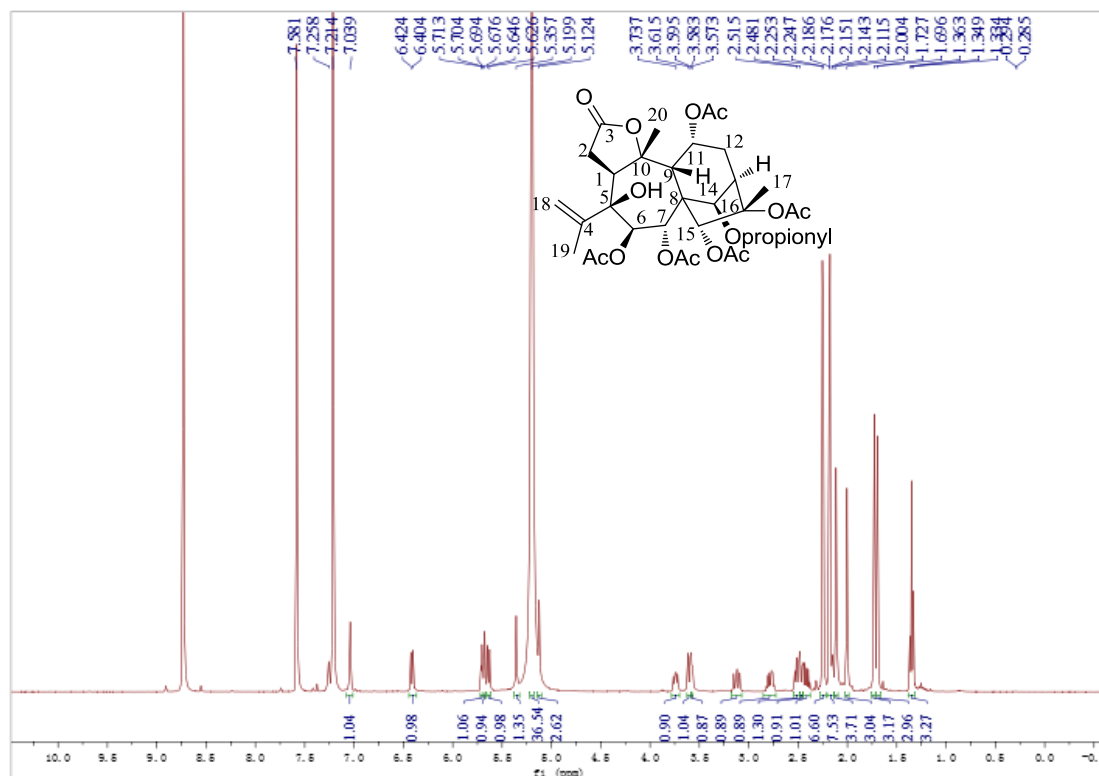

Figure S9. <sup>1</sup>H NMR spectrum of **1** (500 MHz, in C<sub>5</sub>D<sub>5</sub>N)

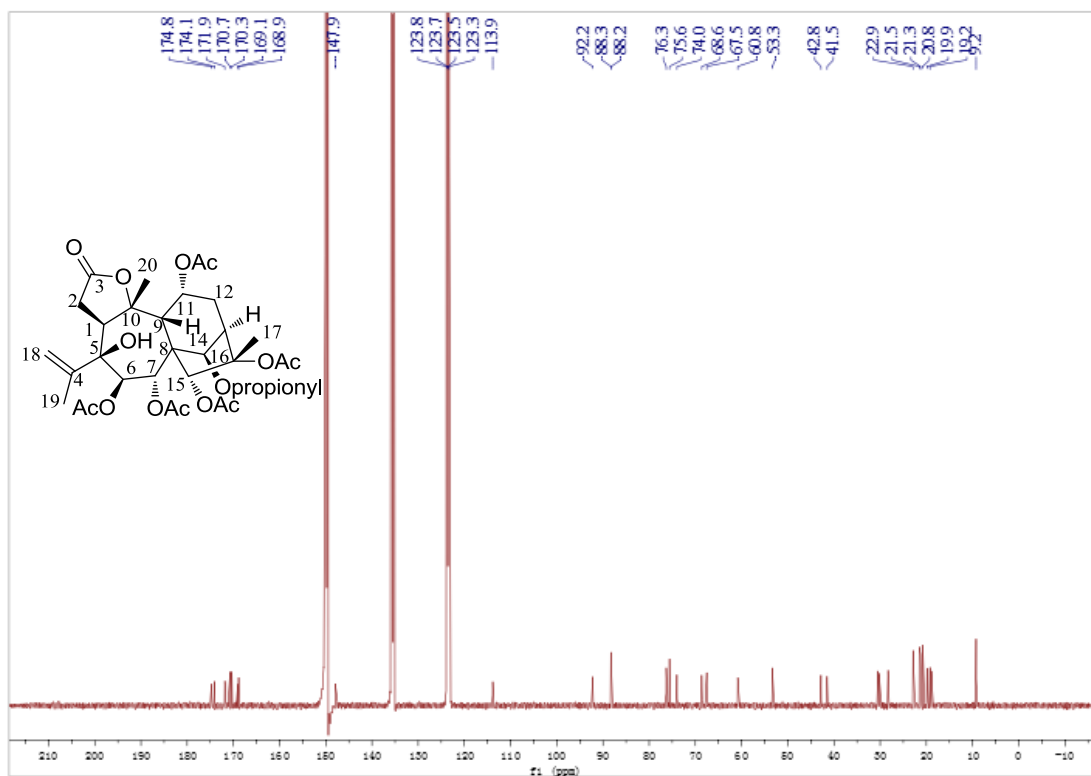

**Figure S10.**  $^{13}\text{C}$  NMR spectrum of **1** (125 MHz, in  $\text{C}_5\text{D}_5\text{N}$ )

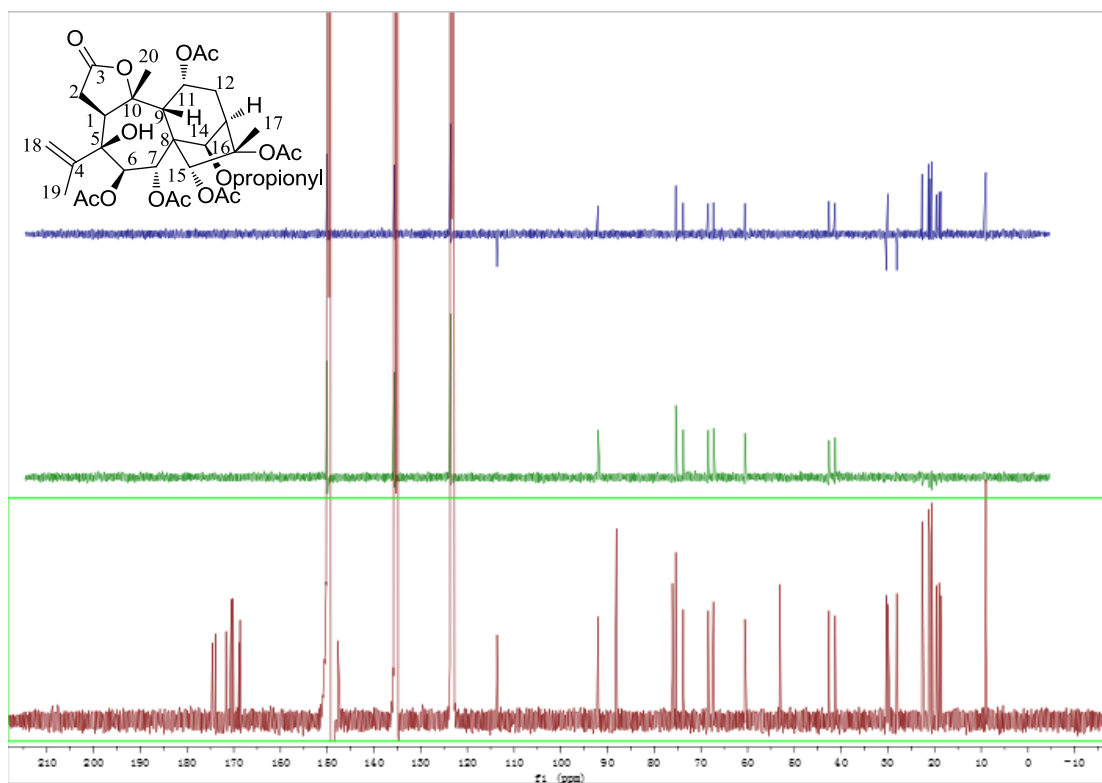

**Figure S11.** DEPT spectrum of **1** (125 MHz, in  $\text{C}_5\text{D}_5\text{N}$ )

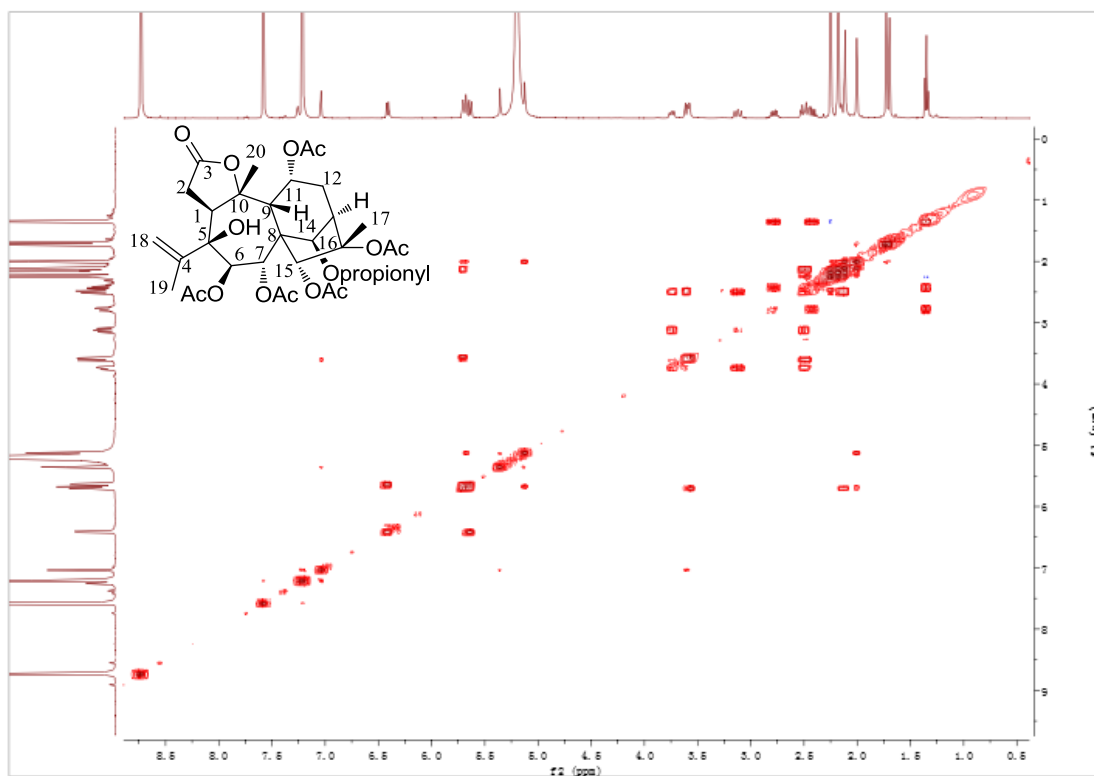

**Figure S12.**  $^1\text{H}$ - $^1\text{H}$  COSY spectrum of **1** (500 MHz, in  $\text{C}_5\text{D}_5\text{N}$ )

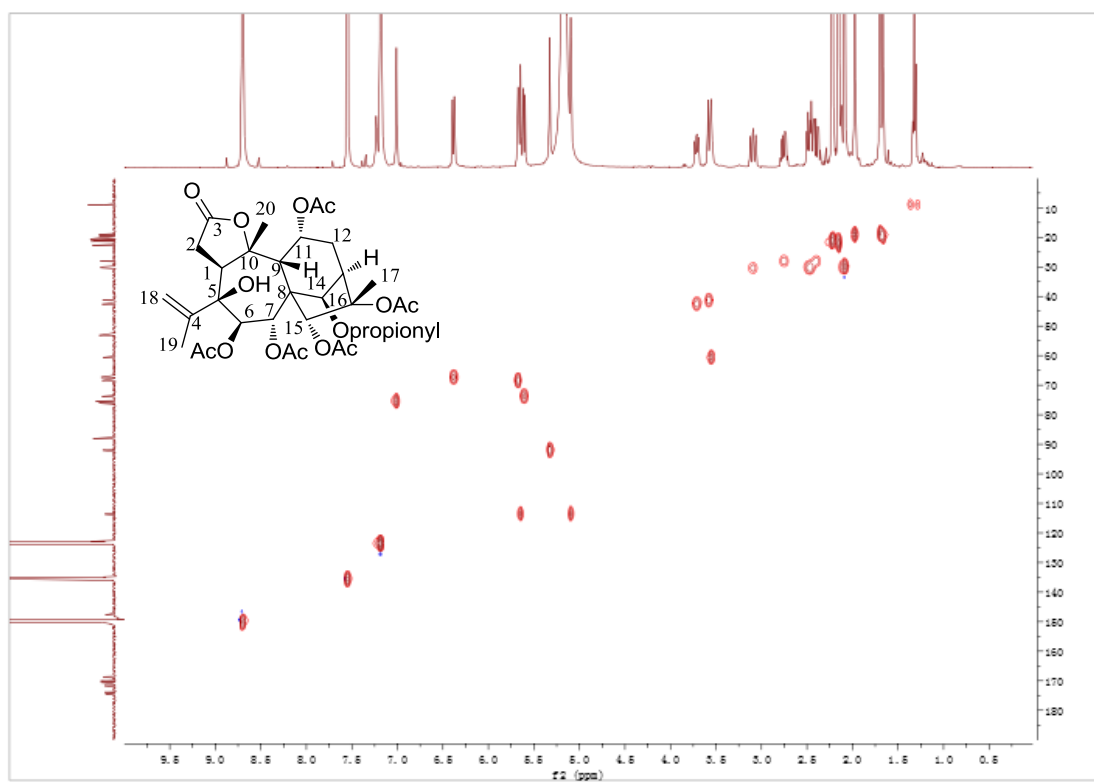

**Figure S13.** HSQC spectrum of **1** (500 MHz, in  $\text{C}_5\text{D}_5\text{N}$ )

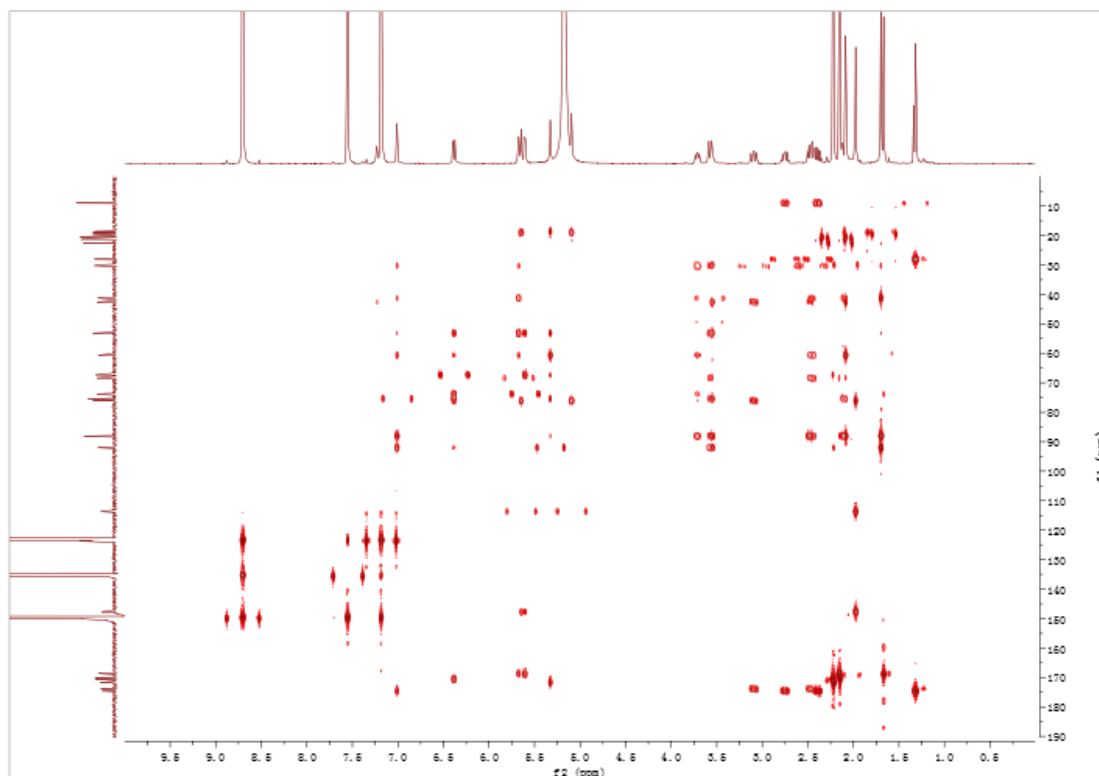

**Figure S14.** HMBC spectrum of **1** (500 MHz, in  $C_5D_5N$ )

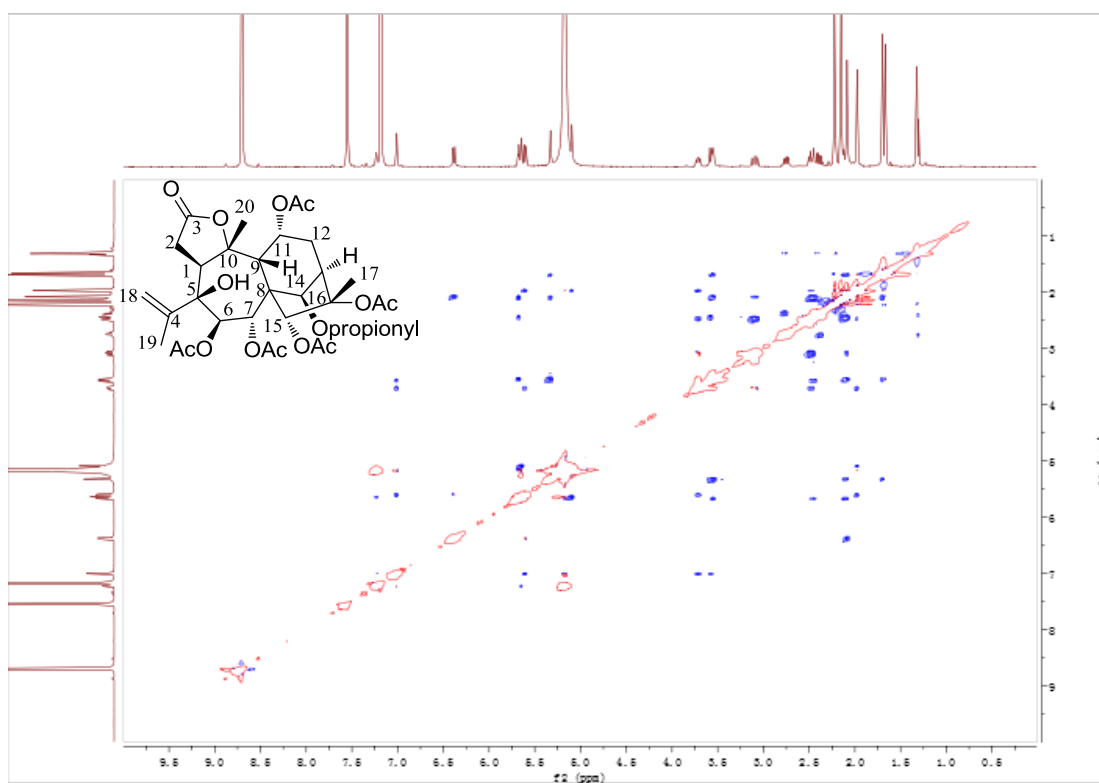

**Figure S15.** NOESY spectrum of **1** (500 MHz, in  $C_5D_5N$ )

**Table S1.** Crystal data and structure refinement for **1**

|                                                                                         |                                                   |
|-----------------------------------------------------------------------------------------|---------------------------------------------------|
| Identification code                                                                     | exp_3806                                          |
| Empirical formula                                                                       | C33H44O16                                         |
| Formula weight                                                                          | 696.68                                            |
| Temperature/K                                                                           | 104.3                                             |
| Crystal system                                                                          | triclinic                                         |
| Space group                                                                             | P1                                                |
| a / Å, b / Å, c / Å                                                                     | 8.6705(4), 17.6150(9), 17.7494(7)                 |
| $\alpha/^\circ, \beta/^\circ, \gamma/^\circ$                                            | 64.166(4), 89.173(3), 76.713(4)                   |
| Volume/Å <sup>3</sup>                                                                   | 2638.3(2)                                         |
| Z                                                                                       | 3                                                 |
| $\rho_{\text{calc}}/\text{mg mm}^{-3}$                                                  | 1.315                                             |
| $\mu/\text{mm}^{-1}$                                                                    | 0.894                                             |
| F(000)                                                                                  | 1110                                              |
| Crystal size/mm <sup>3</sup>                                                            | 0.40 × 0.26 × 0.04                                |
| 2 $\theta$ range for data collection                                                    | 9.1 to 142.46°                                    |
| Index ranges                                                                            | -10 ≤ h ≤ 10, -22 ≤ k ≤ 22, -21 ≤ l ≤ 22          |
| Reflections collected                                                                   | 38245                                             |
| Independent reflections                                                                 | 16761[R(int) = 0.0353 (inf-0.9Å)]                 |
| Data/restraints/parameters                                                              | 16761/5/1364                                      |
| Goodness-of-fit on F <sup>2</sup>                                                       | 1.020                                             |
| Final R indexes [I > 2 $\sigma$ (I) i.e. F <sub>o</sub> > 4 $\sigma$ (F <sub>o</sub> )] | R <sub>1</sub> = 0.0444, wR <sub>2</sub> = 0.1138 |
| Final R indexes [all data]                                                              | R <sub>1</sub> = 0.0467 wR <sub>2</sub> = 0.1165  |
| Largest diff. peak/hole/e Å <sup>-3</sup>                                               | 0.464/-0.446                                      |
| Flack Parameters                                                                        | 0.00(8)                                           |
| Completeness                                                                            | 0.983                                             |

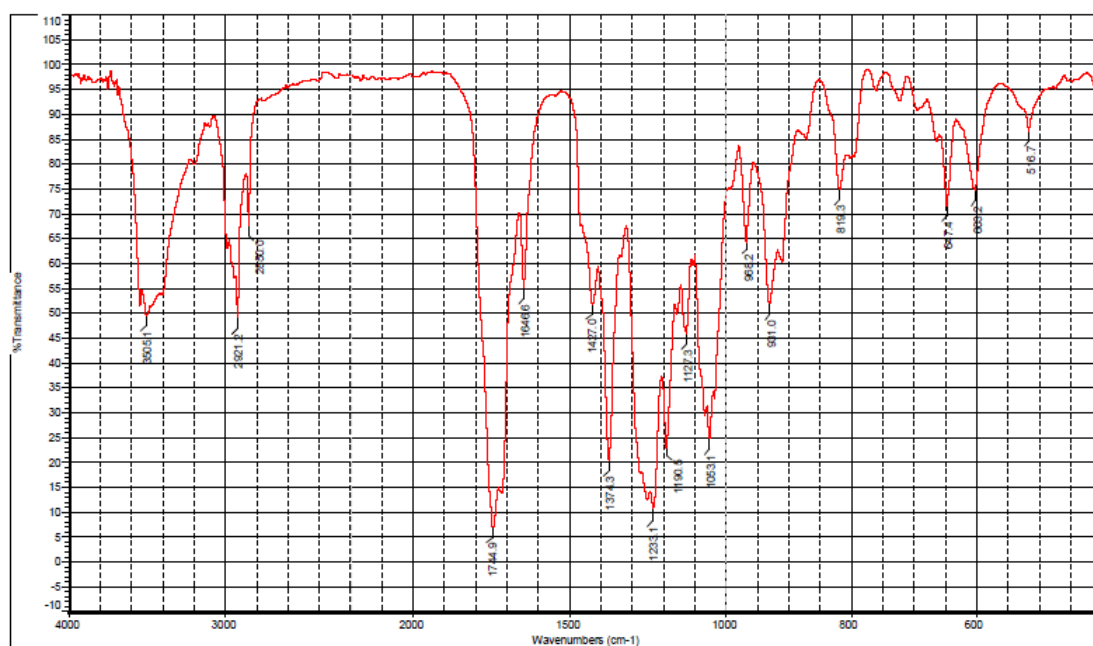**Figure S16.** IR spectrum of **2**

MS Formula Results: + Scan (6.290 min) Sub (2015091701.d)

| m/z      | Ion                 | Formula        | Abundance |           |          |           |          |            |                |            |             |               |     |
|----------|---------------------|----------------|-----------|-----------|----------|-----------|----------|------------|----------------|------------|-------------|---------------|-----|
| 661.2477 | (M+Na) <sup>+</sup> | C31 H42 Na O14 | 344442.6  |           |          |           |          |            |                |            |             |               |     |
| Best     | Formula (M)         | Ion Formula    | Score     | Cross Sco | Mass     | Calc Mass | Calc m/z | Diff (ppm) | Abs Diff (ppm) | Mass Match | Abund Match | Spacing Match | DGE |
| ✓        | C31 H42 O14         | C31 H42 Na O14 | 99.86     |           | 638.2584 | 638.2575  | 661.2467 | -1.47      | 1.47           | 99.93      | 99.73       | 99.89         | 11  |
| ✓        | C32 H38 Na O10      | C32 H38 Na O10 | 96.62     |           | 638.2584 | 638.2588  | 661.246  | 0.81       | 0.81           | 96.99      | 96.76       | 99.83         | 16  |
| ✓        | C27 H38 Na O12      | C27 H38 Na O12 | 96.47     |           | 638.2584 | 638.2543  | 661.244  | -5.7       | 5.7            | 98.93      | 99.86       | 99.96         | 12  |
| ✓        | C20 H42 Na O17      | C20 H42 Na O17 | 96.62     |           | 638.2584 | 638.2606  | 661.2499 | 3.49       | 3.49           | 99.4       | 95.87       | 99.99         | 3   |
| ✓        | C44 H34 Na O3       | C44 H34 Na O3  | 96.34     |           | 638.2584 | 638.2569  | 661.2462 | -2.28      | 2.28           | 99.83      | 87.58       | 99.86         | 26  |
| ✓        | C49 H34 Na O        | C49 H34 Na O   | 94.54     |           | 638.2584 | 638.261   | 661.2502 | 4.02       | 4.02           | 99.47      | 81.9        | 99.84         | 33  |

Figure S17. (+)-HRESIMS data of **2**

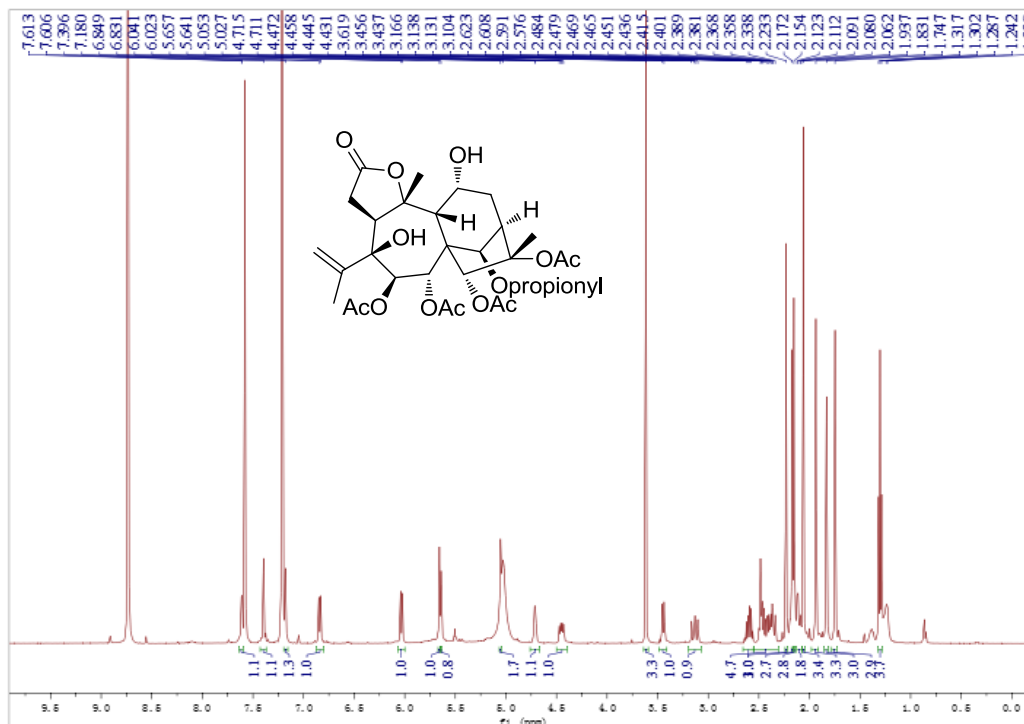

Figure S18. <sup>1</sup>H NMR spectrum of **2** (500 MHz, in C<sub>5</sub>D<sub>5</sub>N)

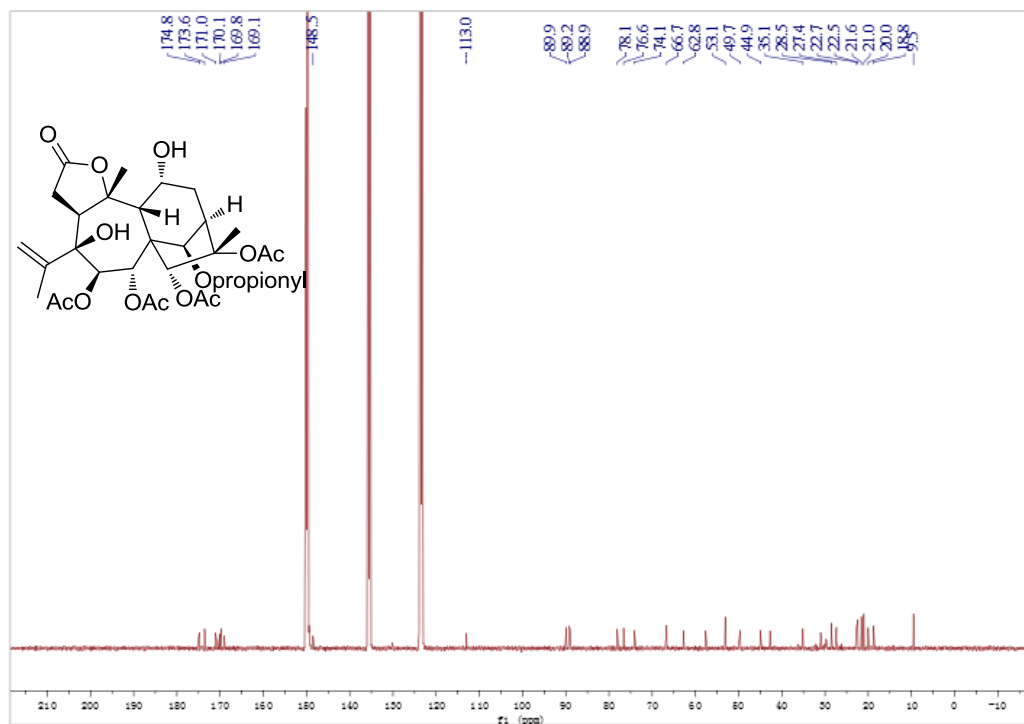

Figure S19. <sup>13</sup>C NMR spectrum of **2** (125 MHz, in C<sub>5</sub>D<sub>5</sub>N)

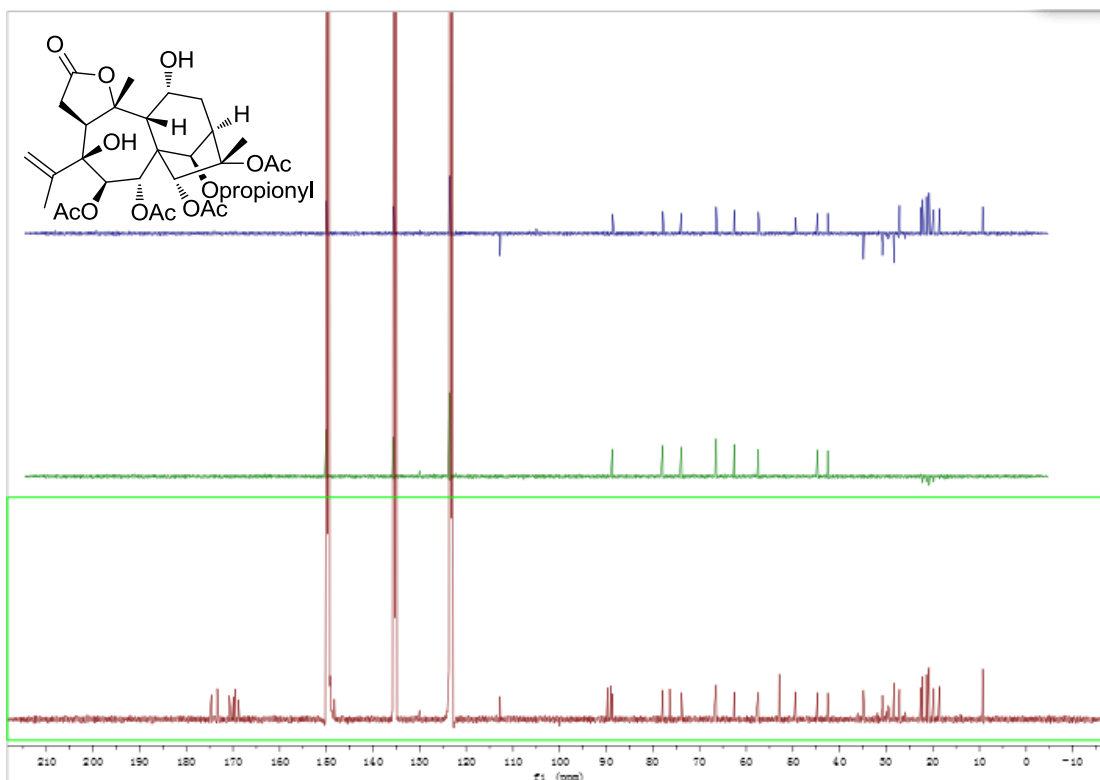

**Figure S20.** DEPT spectrum of **2** (125 MHz, in  $\text{C}_5\text{D}_5\text{N}$ )

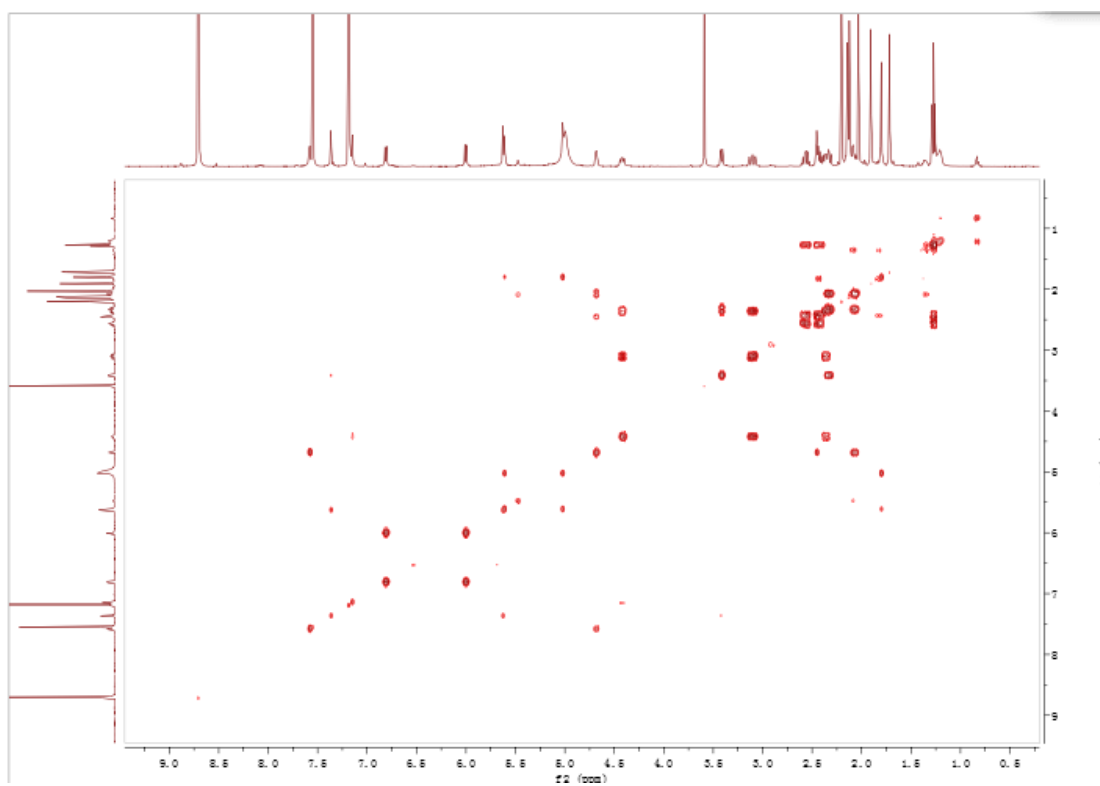

**Figure S21.**  $^1\text{H}$ - $^1\text{H}$  COSY spectrum of **2** (500 MHz, in  $\text{C}_5\text{D}_5\text{N}$ )



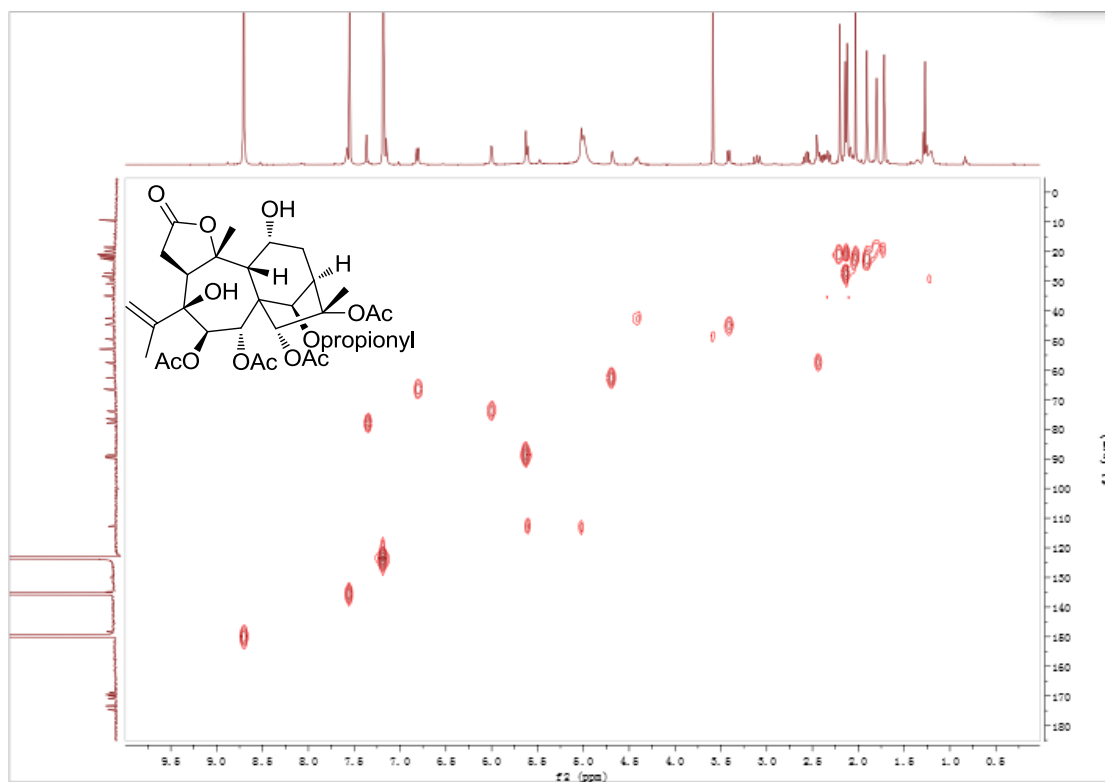

**Figure S22.** HSQC spectrum of **2** (500 MHz, in  $\text{C}_5\text{D}_5\text{N}$ )

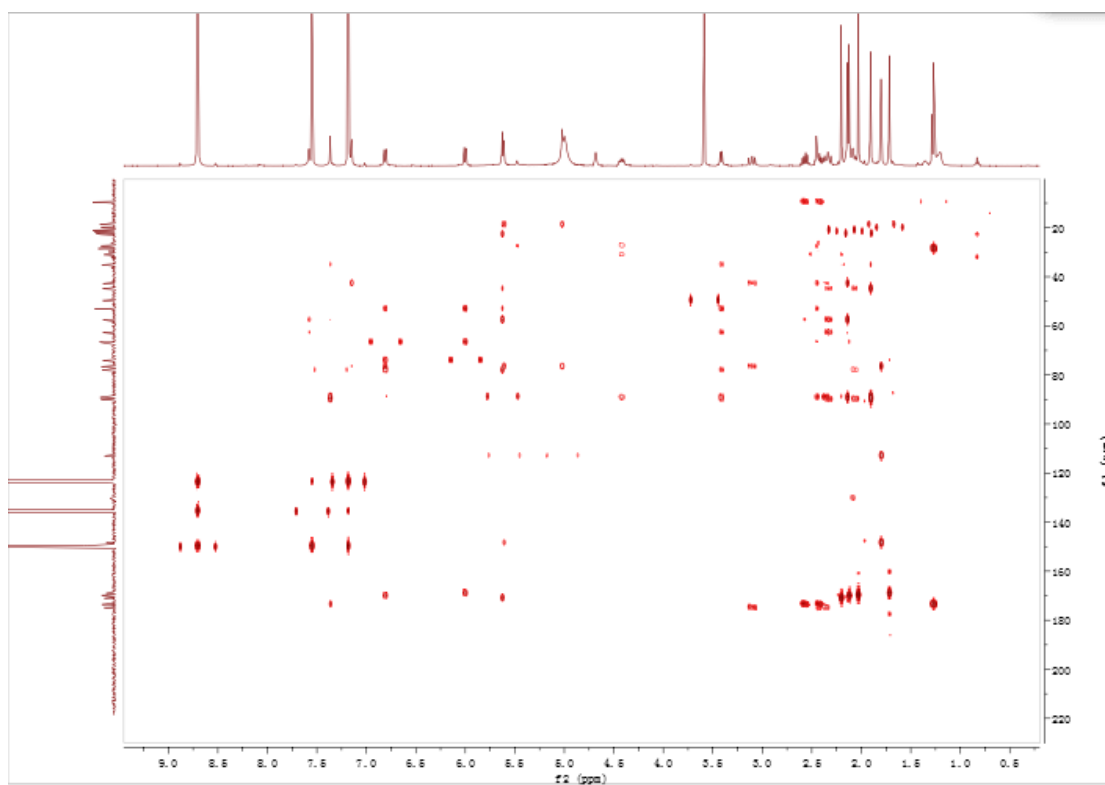

**Figure S23.** HMBC spectrum of **2** (500 MHz, in  $\text{C}_5\text{D}_5\text{N}$ )

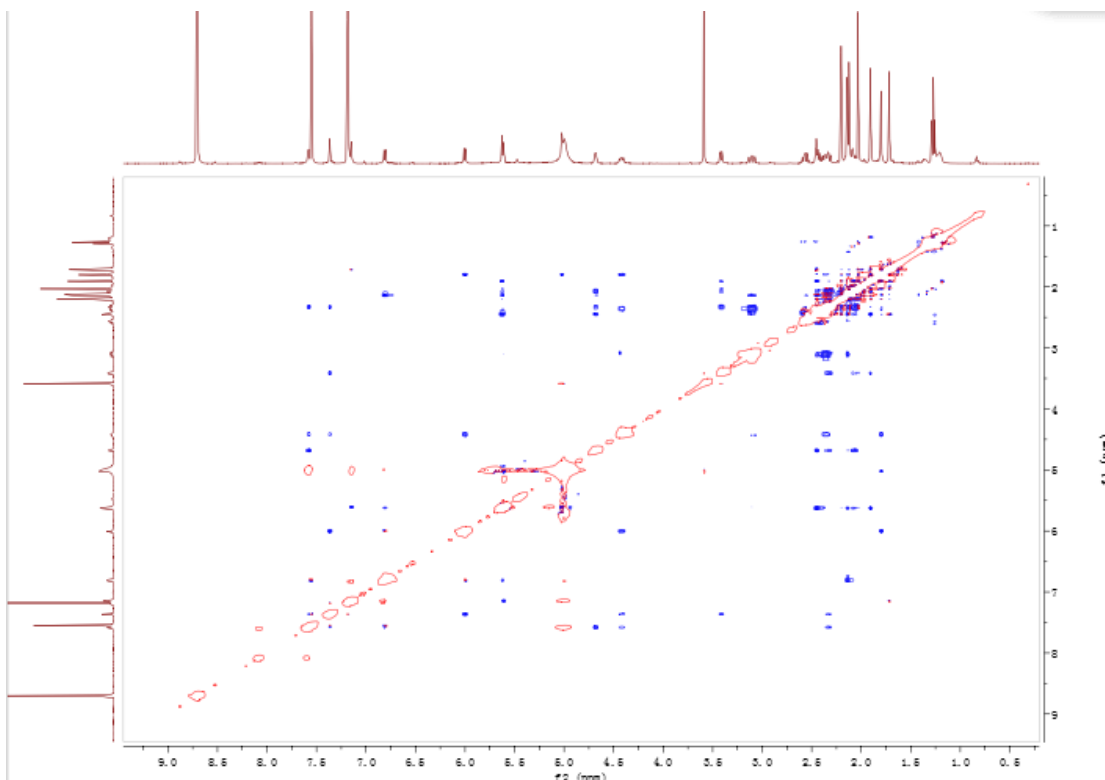

Figure S24. NOESY spectrum of **2** (500 MHz, in C<sub>5</sub>D<sub>5</sub>N)

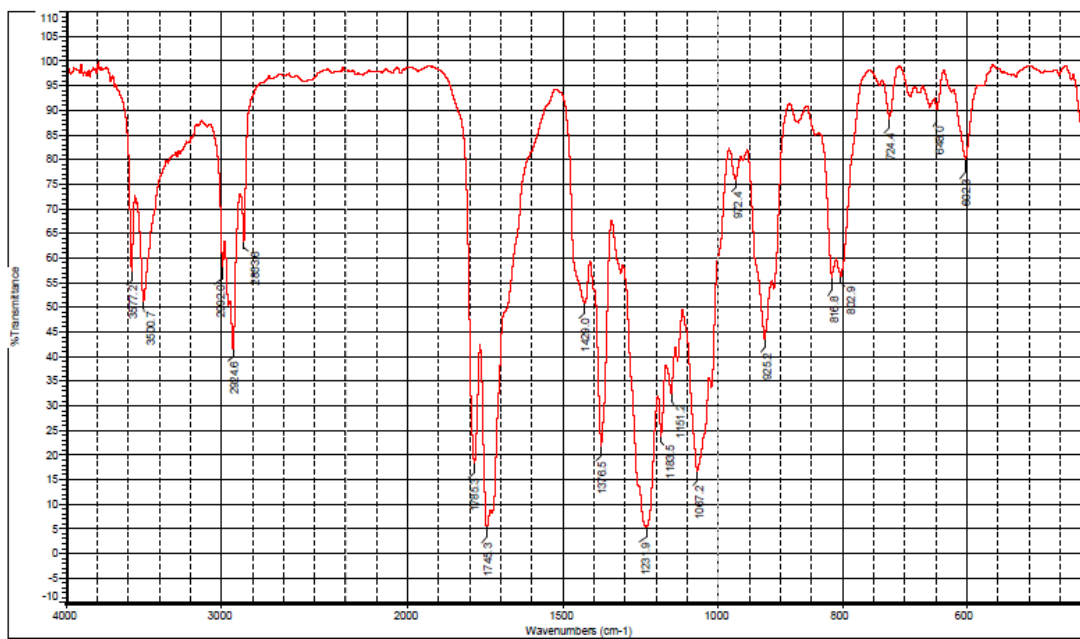

Figure S25. IR spectrum of **3**

MS Formula Results: + Scan (6.357 min) Sub (2015052601.d)

| m/z      | Ion                 | Formula                                           | Abundance |
|----------|---------------------|---------------------------------------------------|-----------|
| 861.2467 | (M+Na) <sup>+</sup> | C <sub>31</sub> H <sub>42</sub> NaO <sub>14</sub> | 57921.8   |

  

| Best | Formula (M)                                                   | Ion Formula                                                     | Score | Cross Sco | Mass     | Calc Mass | Calc m/z | Diff (ppm) | Abs Diff (ppm) | Mass Match | Abund Match | Spcing Match | DBE |
|------|---------------------------------------------------------------|-----------------------------------------------------------------|-------|-----------|----------|-----------|----------|------------|----------------|------------|-------------|--------------|-----|
| ✓    | C <sub>31</sub> H <sub>42</sub> O <sub>14</sub>               | C <sub>31</sub> H <sub>42</sub> NaO <sub>14</sub>               | 99.81 |           | 638.2575 | 638.2575  | 661.2467 | -0.08      | 0.08           | 100        | 99.87       | 99.37        | 11  |
|      | C <sub>32</sub> H <sub>38</sub> NaO <sub>15</sub>             | C <sub>32</sub> H <sub>38</sub> NaO <sub>15</sub>               | 99.59 |           | 638.2575 | 638.2568  | 661.2448 | -2         | 2              | 99.87      | 99.3        | 99.37        | 15  |
|      | C <sub>27</sub> H <sub>38</sub> NaO <sub>12</sub>             | C <sub>27</sub> H <sub>38</sub> NaO <sub>12</sub>               | 99.42 |           | 638.2575 | 638.2548  | 661.244  | -4.32      | 4.32           | 99.38      | 99.45       | 99.44        | 12  |
|      | C <sub>20</sub> H <sub>42</sub> NaO <sub>17</sub>             | C <sub>20</sub> H <sub>42</sub> NaO <sub>17</sub>               | 97.74 |           | 638.2575 | 638.2808  | 661.3499 | 4.88       | -4.88          | 99.21      | 93.8        | 99.51        | 3   |
|      | C <sub>44</sub> H <sub>34</sub> N <sub>2</sub> O <sub>3</sub> | C <sub>44</sub> H <sub>34</sub> N <sub>2</sub> NaO <sub>3</sub> | 97.03 |           | 638.2575 | 638.2859  | 661.3462 | -0.89      | 0.89           | 99.97      | 90.28       | 99.23        | 29  |
|      | C <sub>49</sub> H <sub>34</sub> O                             | C <sub>49</sub> H <sub>34</sub> NaO                             | 95.11 |           | 638.2575 | 638.281   | 661.2502 | 5.42       | 5.42           | 99.03      | 85.2        | 99.17        | 33  |

Figure S26. (+)-HRESIMS data of **3**

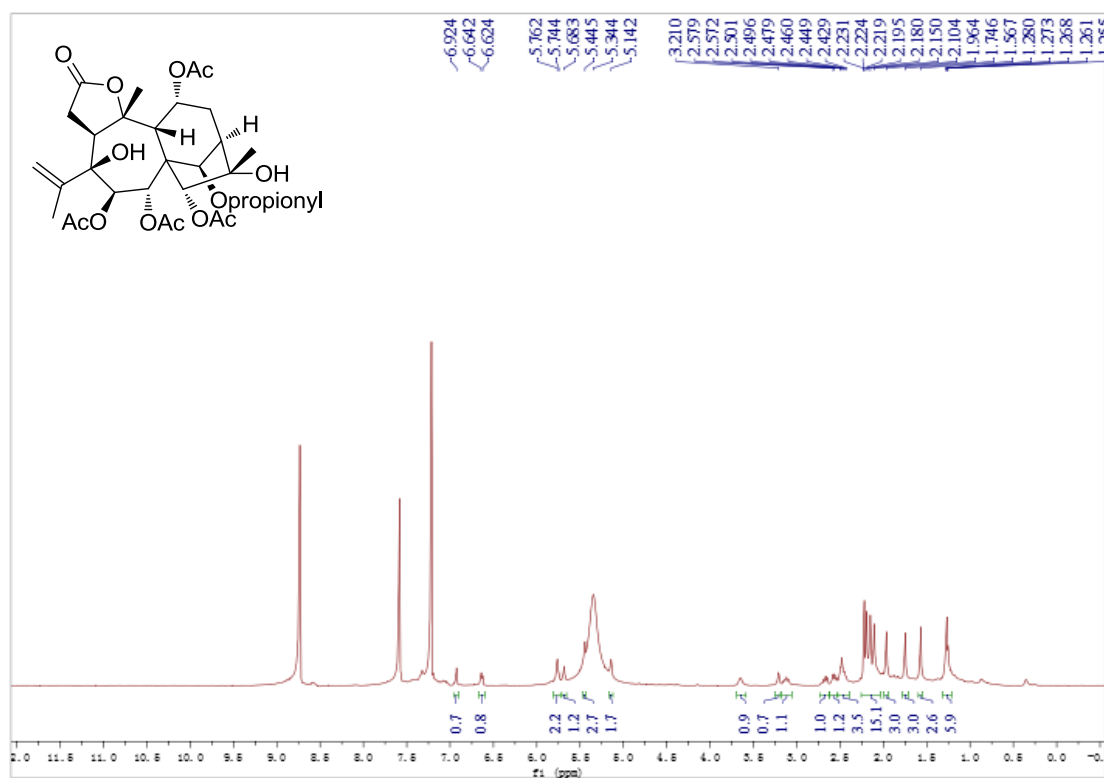

Figure S27.  $^1\text{H}$  NMR spectrum of **3** (600 MHz, in  $\text{C}_5\text{D}_5\text{N}$ )

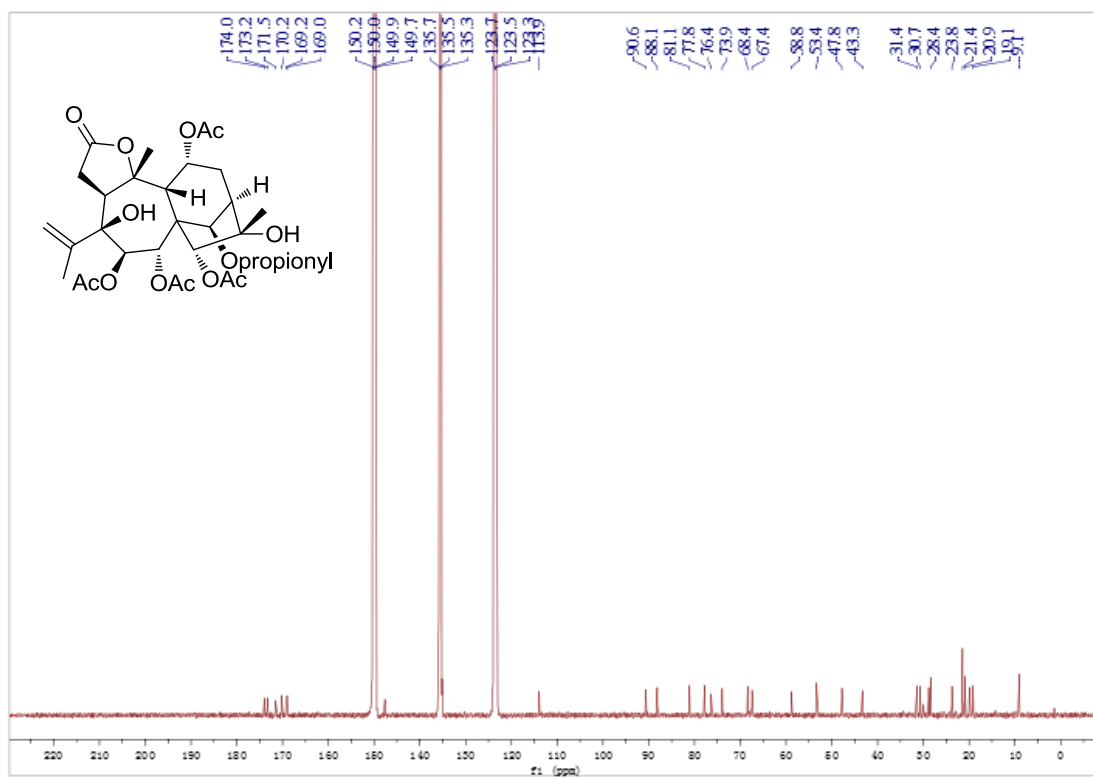

Figure S28.  $^{13}\text{C}$  NMR spectrum of **3** (150 MHz, in  $\text{C}_5\text{D}_5\text{N}$ )

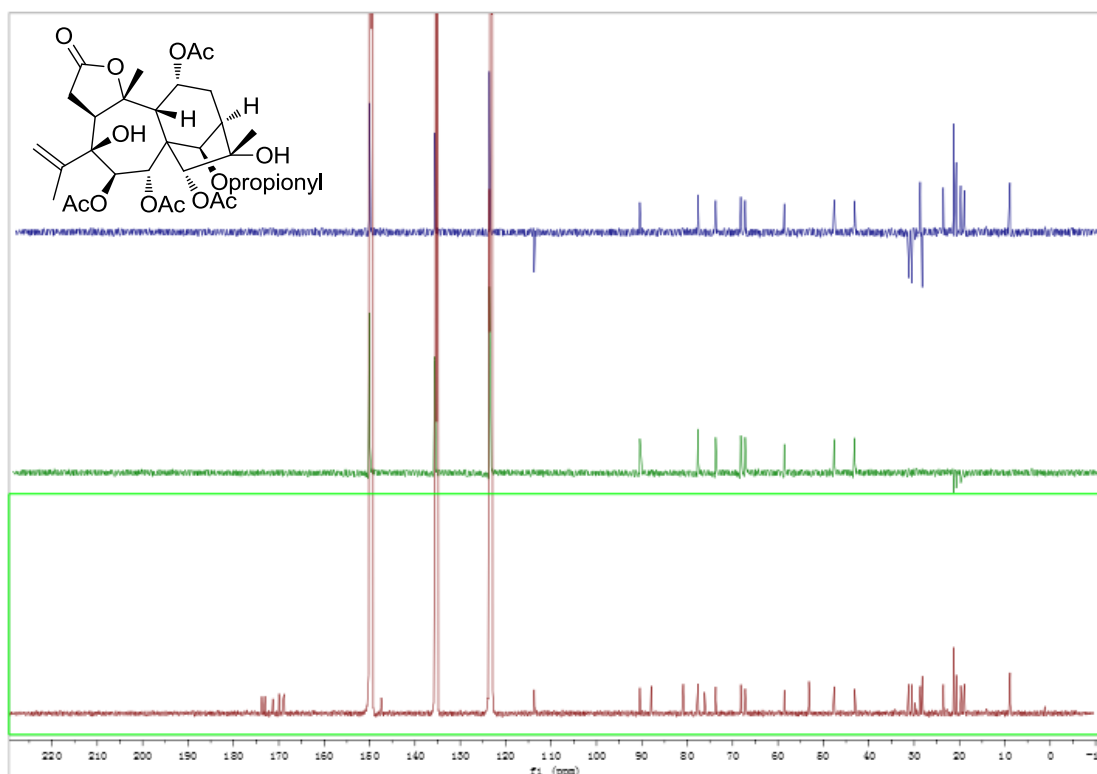

**Figure S29.** DEPT spectrum of **3** (150 MHz, in  $C_5D_5N$ )

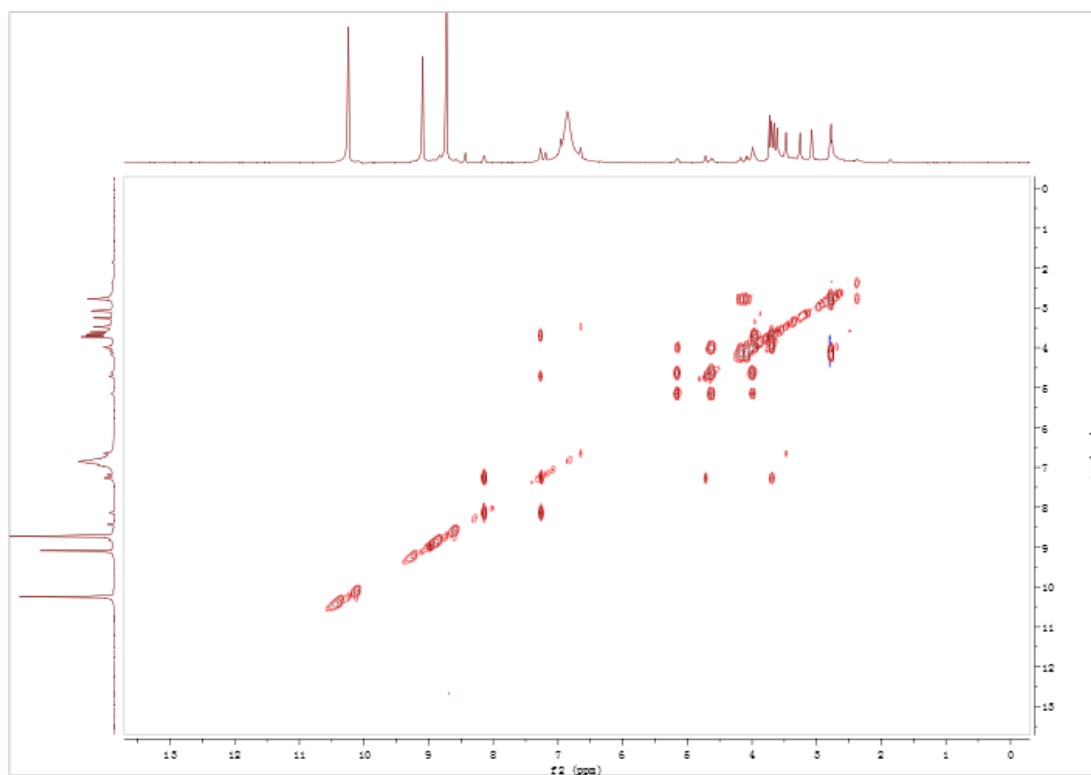

**Figure S30.**  $^1H$ - $^1H$  COSY spectrum of **3** (600 MHz, in  $C_5D_5N$ )

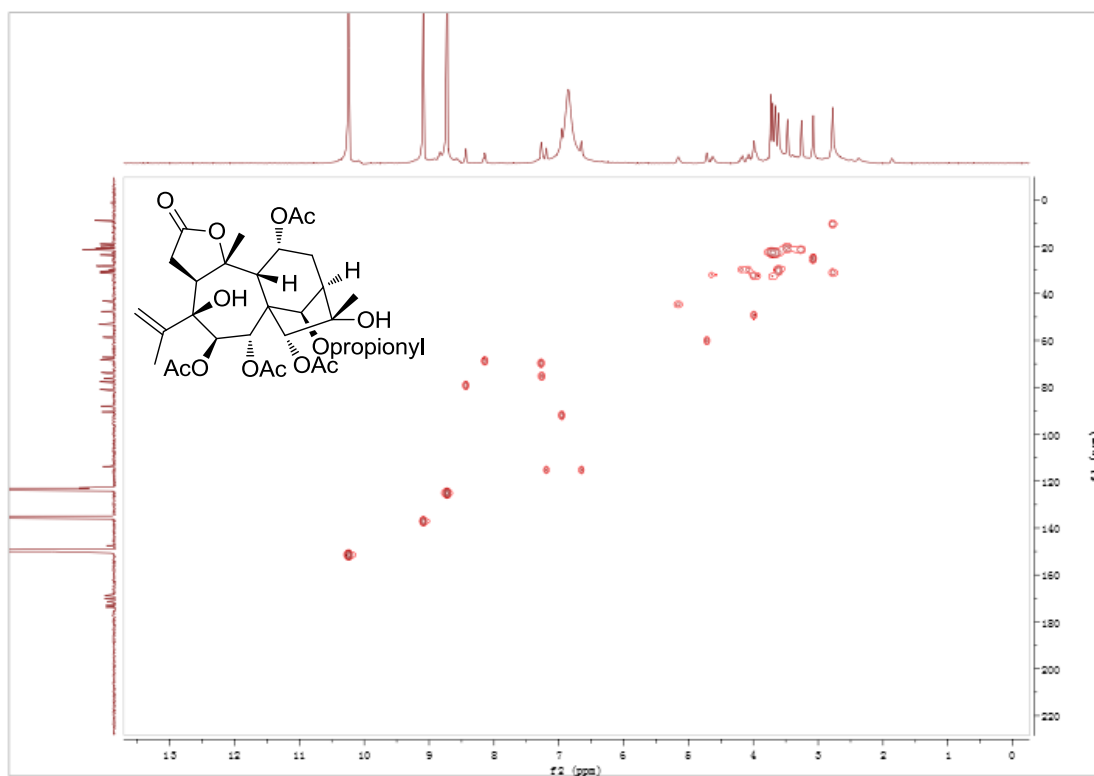

**Figure S31.** HSQC spectrum of **3** (600 MHz, in C<sub>5</sub>D<sub>5</sub>N)

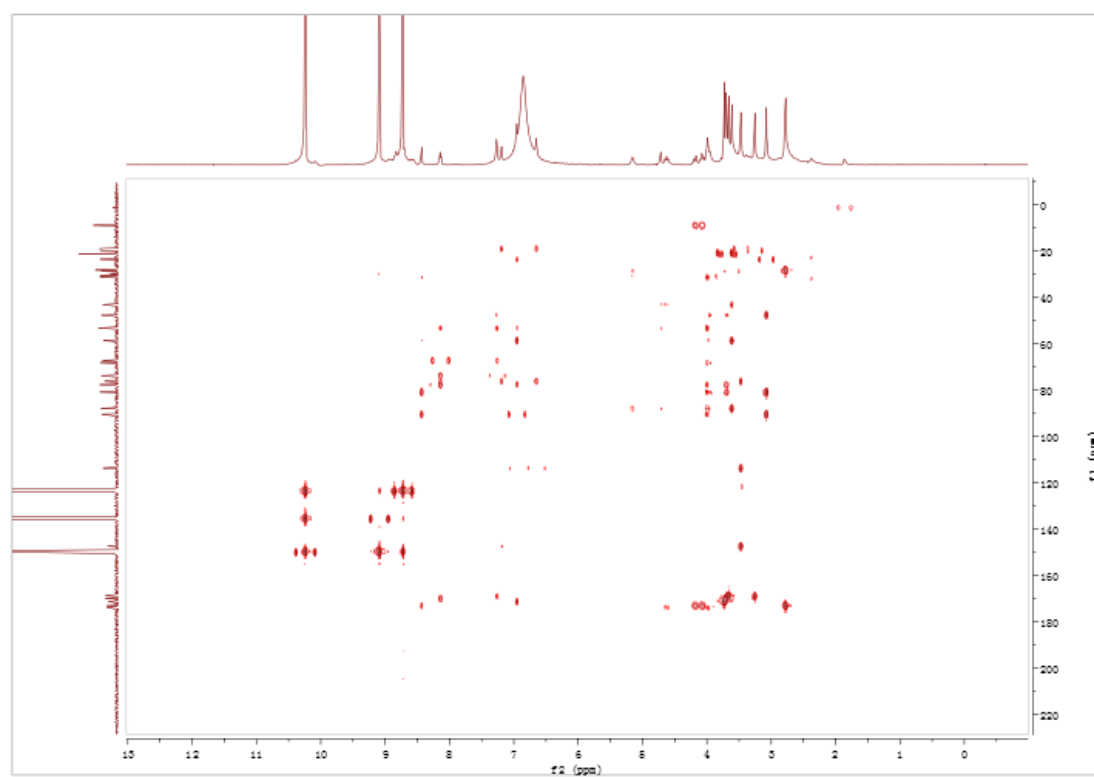

**Figure S32.** HMBC spectrum of **3** (600 MHz, in C<sub>5</sub>D<sub>5</sub>N)

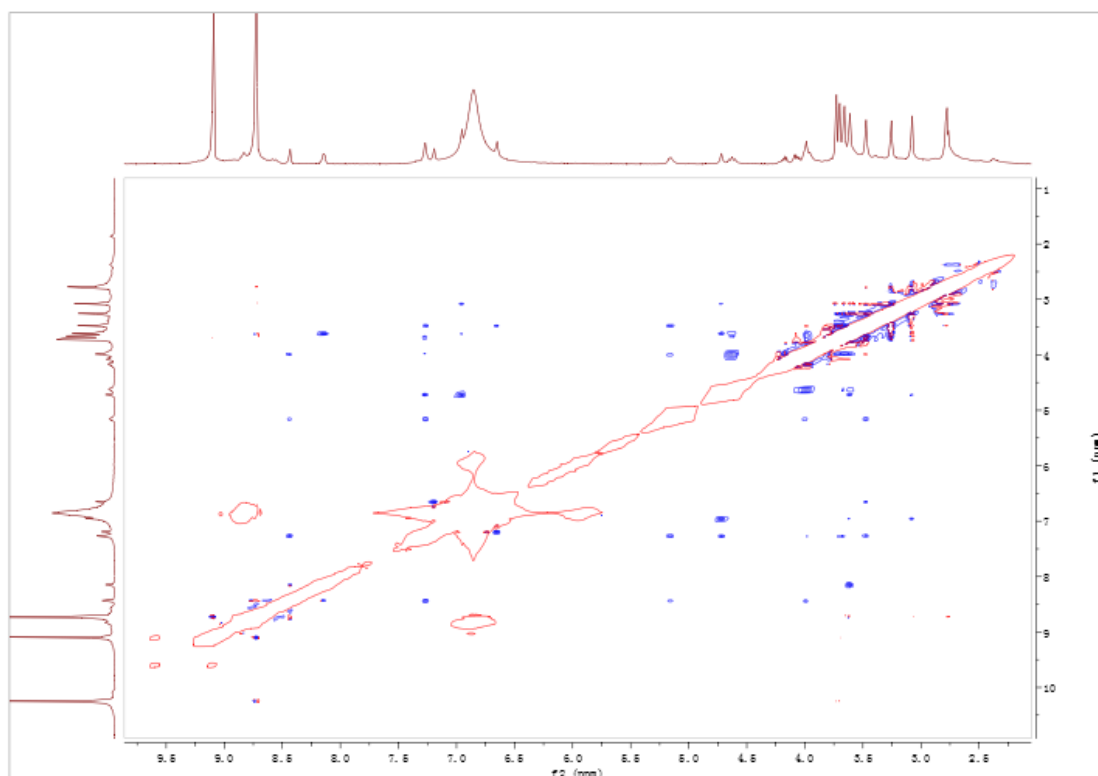

Figure S33. NOESY spectrum of **3** (600 MHz, in  $C_5D_5N$ )

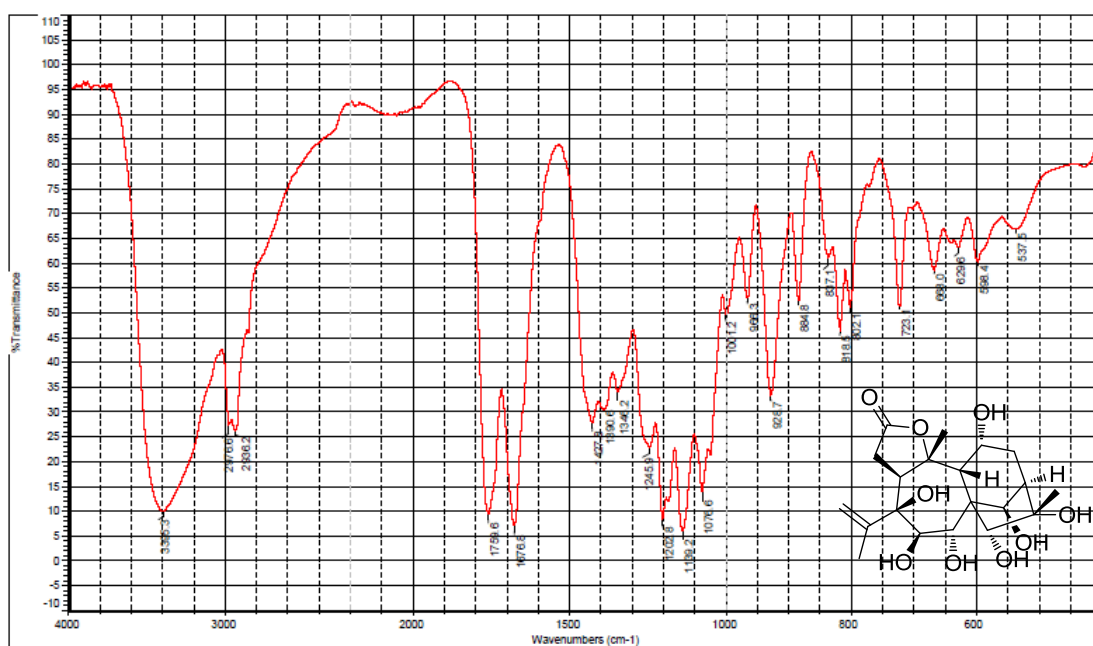

Figure S34. IR spectrum of **4**

MS Formula Results: + Scan (3.630 min) Sub (2016053006.d)

| m/z      | Ion                | Formula    | Abundance |
|----------|--------------------|------------|-----------|
| 415.1984 | (M+H) <sup>+</sup> | C20 H31 O9 | 49119.2   |

  

| Best | Formula (M)   | Ion Formula   | Score | Cross Sco | Mass     | Calc. Mass | Calc. m/z | Diff (ppm) | Abs Diff (ppm) | Mass Match | Abund Match | Spacing Match | DBE |
|------|---------------|---------------|-------|-----------|----------|------------|-----------|------------|----------------|------------|-------------|---------------|-----|
| ✓    | C20 H31 O9    | C20 H31 O9    | 99.01 |           | 414.1911 | 414.1989   | 415.1993  | 4.98       | 4.98           | 99.19      | 99.46       | 99.33         | 6   |
| ✓    | C17 H34 O9 S  | C17 H35 O9 S  | 97.86 |           | 414.1911 | 414.1924   | 415.1998  | 3.15       | 3.15           | 99.57      | 93.88       | 99.23         | 1   |
| ✓    | C21 H34 O4 S2 | C21 H35 O4 S2 | 97.47 |           | 414.1911 | 414.1899   | 415.1971  | -2.9       | 2.9            | 99.72      | 92.42       | 99.05         | 5   |
| ✓    | C18 H39 O4 S3 | C18 H39 O4 S3 | 94.22 |           | 414.1911 | 414.1932   | 415.2005  | 5.23       | 5.23           | 99.1       | 82.21       | 98.88         | 0   |

Figure S35. (+)-HRESIMS data of **4**

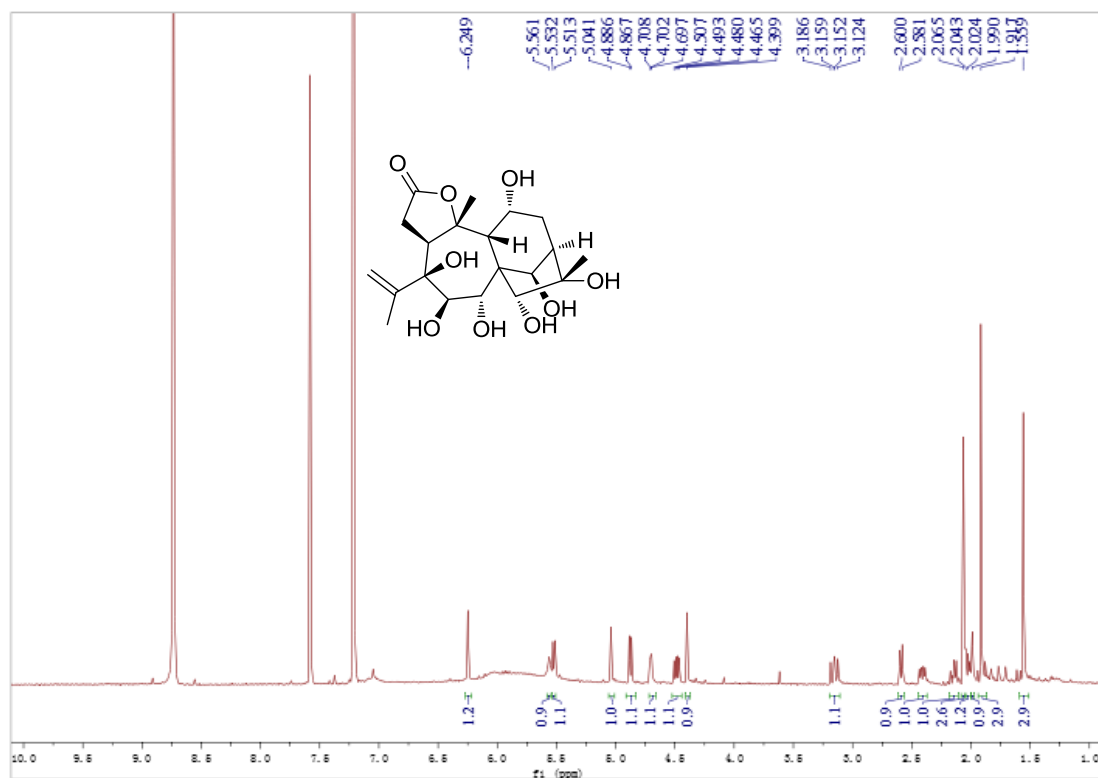

Figure S36.  $^1\text{H}$  NMR spectrum of **4** (500 MHz, in  $\text{C}_5\text{D}_5\text{N}$ )

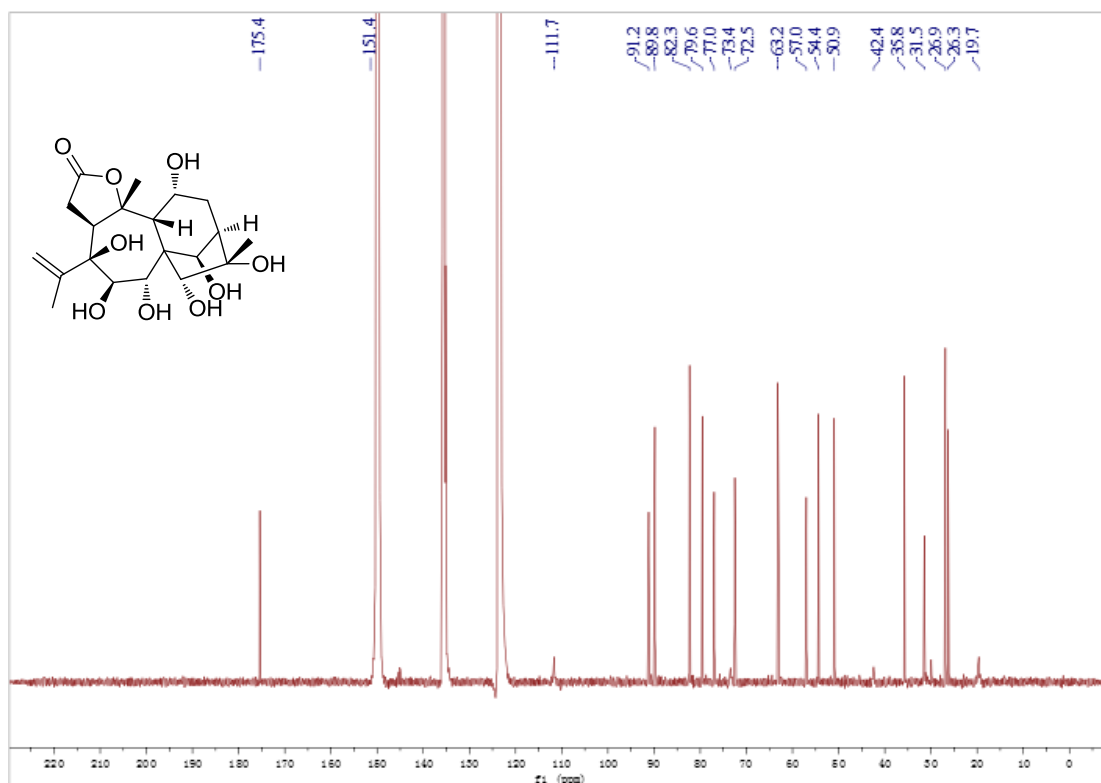

Figure S37.  $^{13}\text{C}$  NMR spectrum of **4** (125 MHz, in  $\text{C}_5\text{D}_5\text{N}$ )

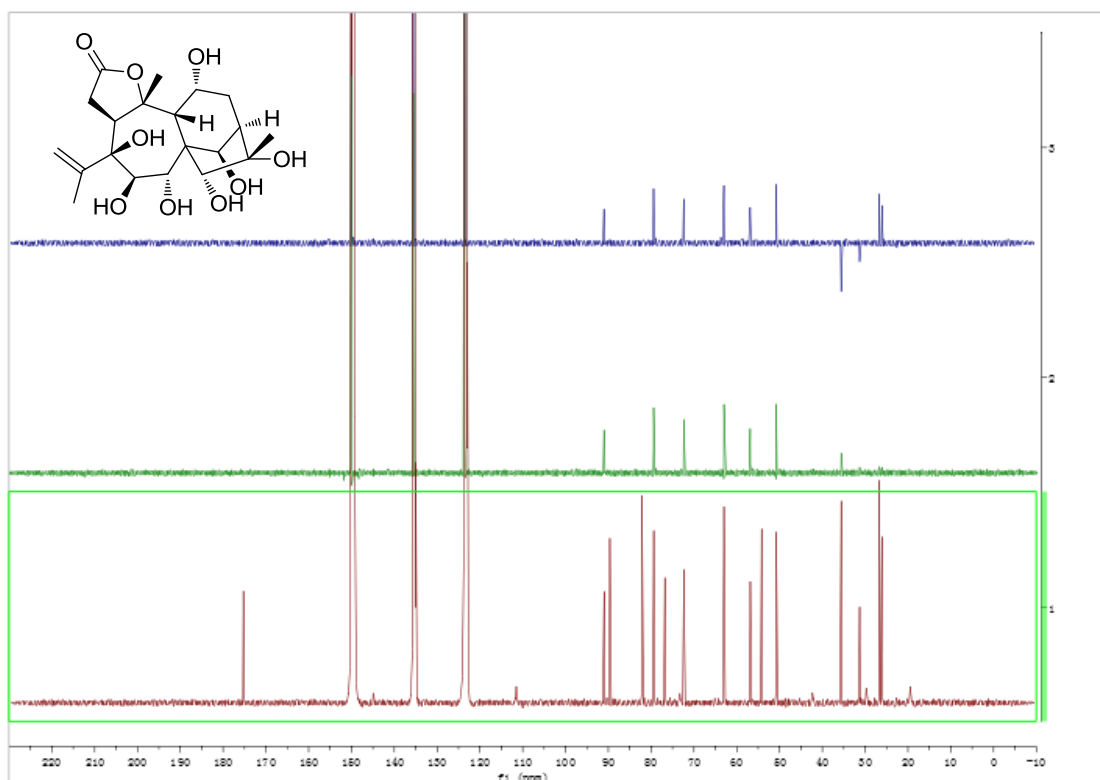

**Figure S38.** DEPT spectrum of **4** (125 MHz, in C<sub>5</sub>D<sub>5</sub>N)

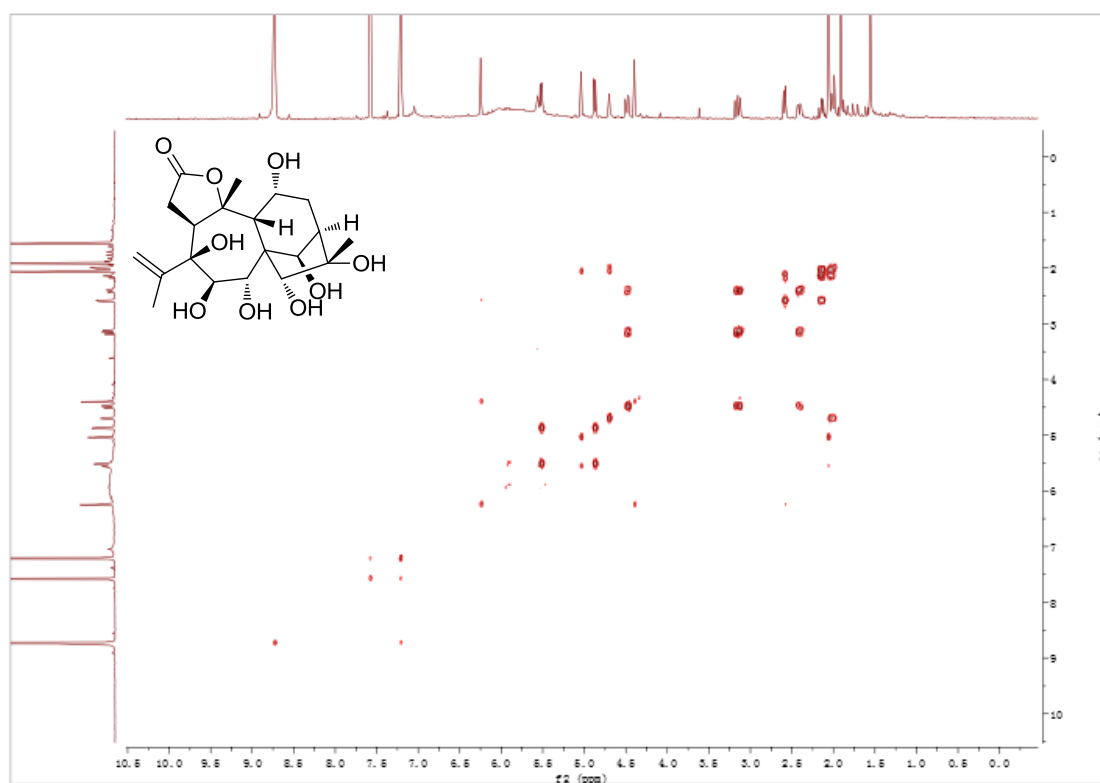

**Figure S39.** <sup>1</sup>H-<sup>1</sup>H COSY spectrum of **4** (500 MHz, in C<sub>5</sub>D<sub>5</sub>N)



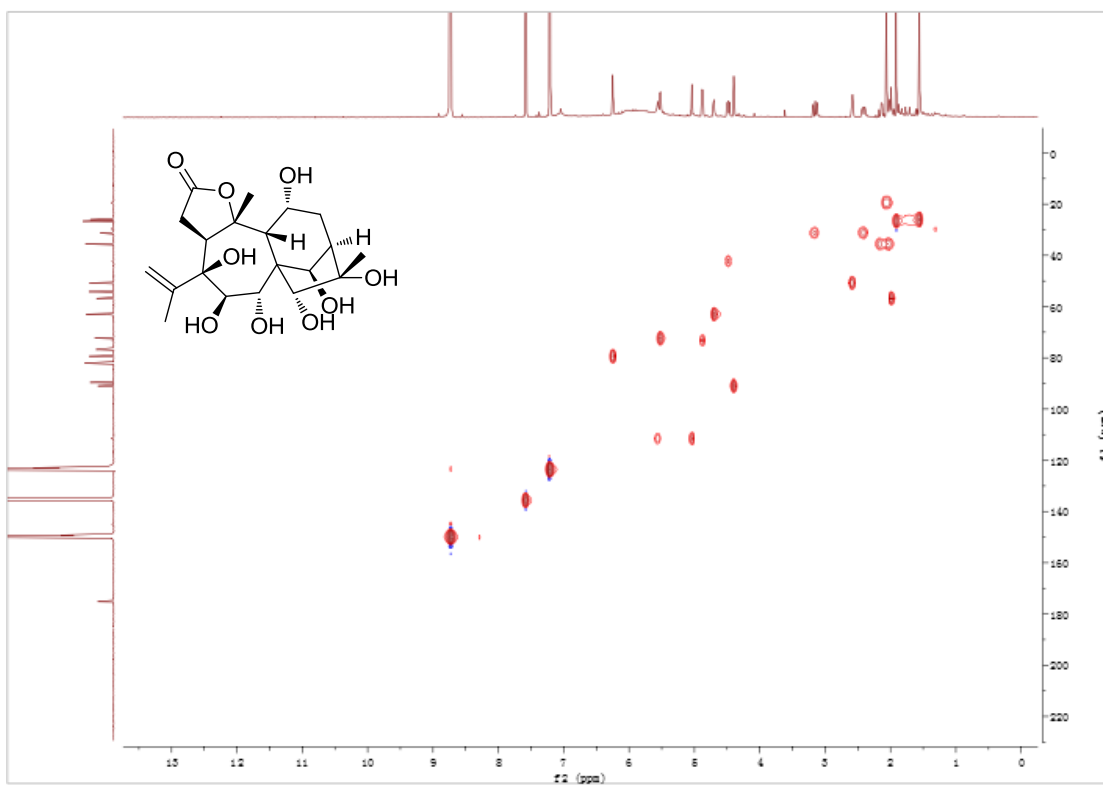

**Figure S40.** HSQC spectrum of **4** (500 MHz, in  $\text{C}_5\text{D}_5\text{N}$ )

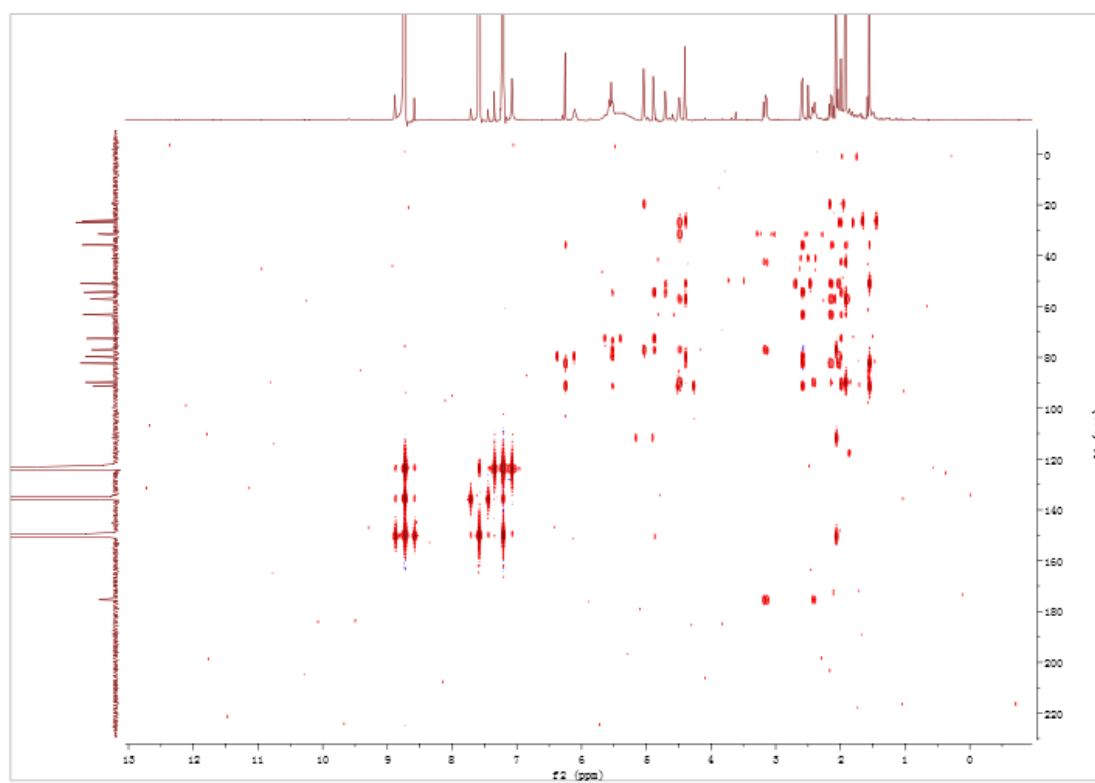

**Figure S41.** HMBC spectrum of **4** (500 MHz, in  $\text{C}_5\text{D}_5\text{N}$ )

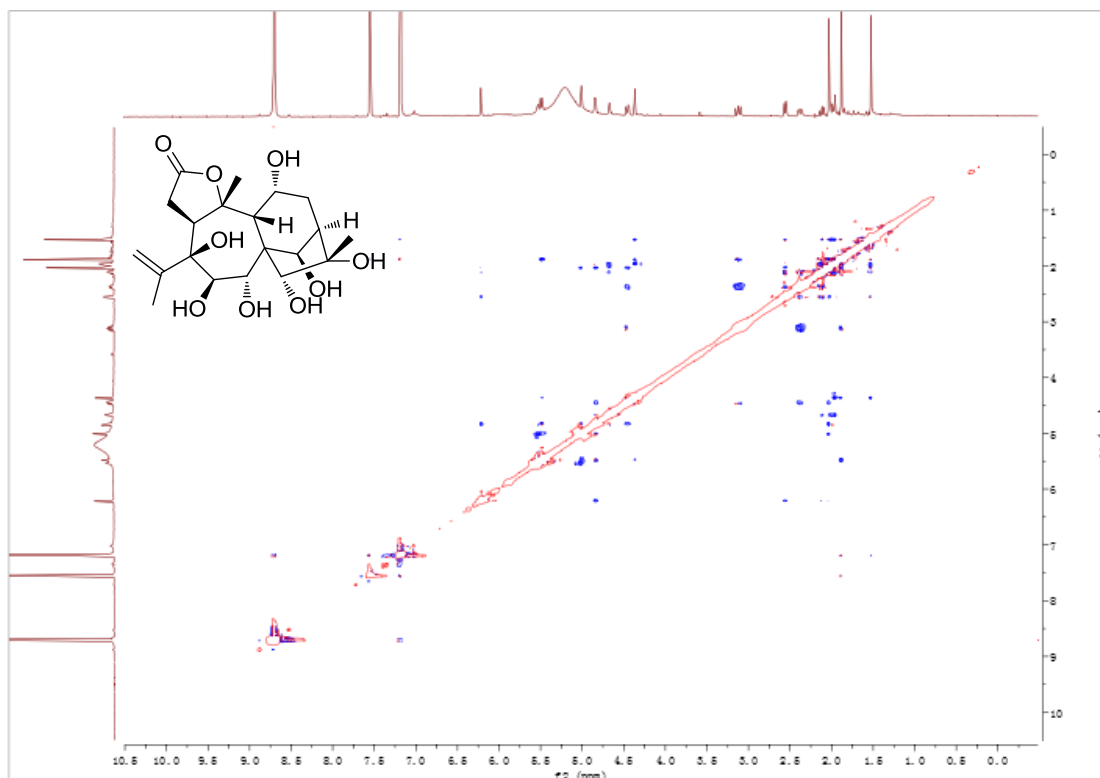

Figure S42. NOESY spectrum of **4** (500 MHz, in C<sub>5</sub>D<sub>5</sub>N)

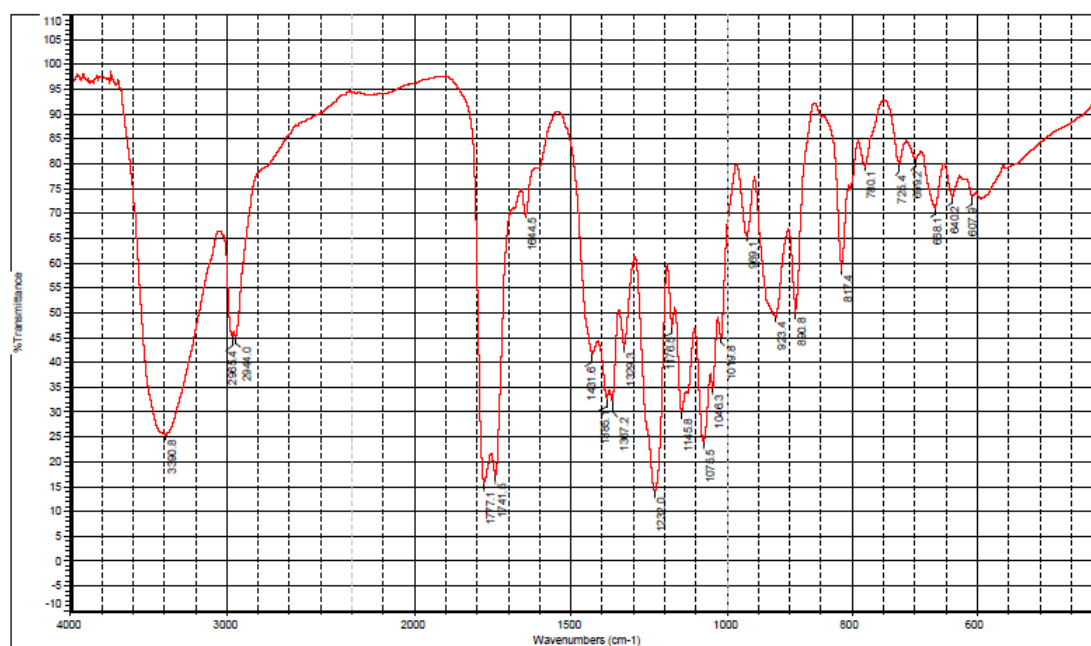

Figure S43. IR spectrum of **5**

MS Formula Results: + Scan (4.539 min) Sub (2016110802.d)

| m/z      | Ion                | Formula       | Abundance |           |          |           |          |            |                |            |             |               |     |
|----------|--------------------|---------------|-----------|-----------|----------|-----------|----------|------------|----------------|------------|-------------|---------------|-----|
| 457.2075 | (M+H) <sup>+</sup> | C22 H33 O10   | 386179.8  |           |          |           |          |            |                |            |             |               |     |
| Best     | Formula (M)        | Ion Formula   | Score     | Cross Sco | Mass     | Calc Mass | Calc m/z | Diff (ppm) | Abs Diff (ppm) | Mass Match | Abund Match | Spacing Match | DfE |
|          |                    | C22 H32 O10   | 99.94     |           | 456.2002 | 456.1995  | 457.2068 | -1.37      | 1.37           | 99.94      | 99.95       | 99.91         | 7   |
|          |                    | C23 H36 O5 S2 | 97.56     |           | 456.2002 | 456.2004  | 457.2077 | 0.53       | 0.53           | 99.99      | 91.9        | 99.51         | 6   |
|          |                    | C27 H36 S3    | 94.65     |           | 456.2002 | 456.1979  | 457.2052 | -4.96      | 4.96           | 99.17      | 83.14       | 98.42         | 10  |

Figure S44. (+)-HRESIMS data of **5**

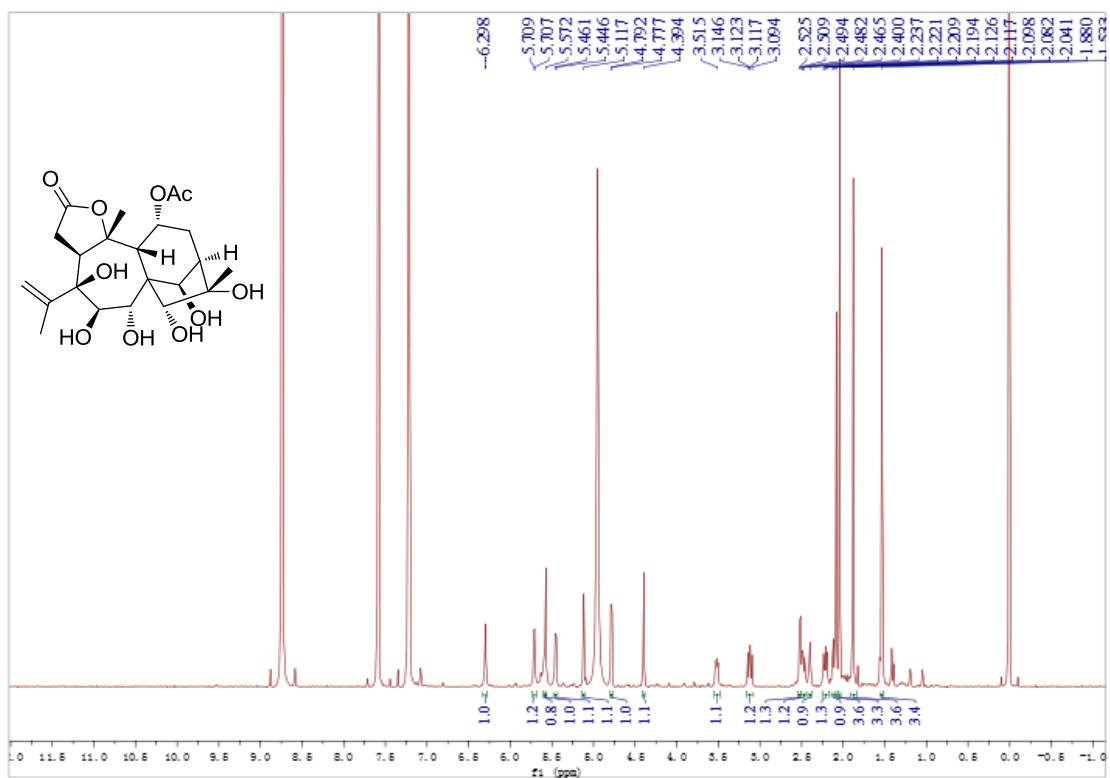

Figure S45.  $^1\text{H}$  NMR spectrum of **5** (600 MHz, in  $\text{C}_5\text{D}_5\text{N}$ )

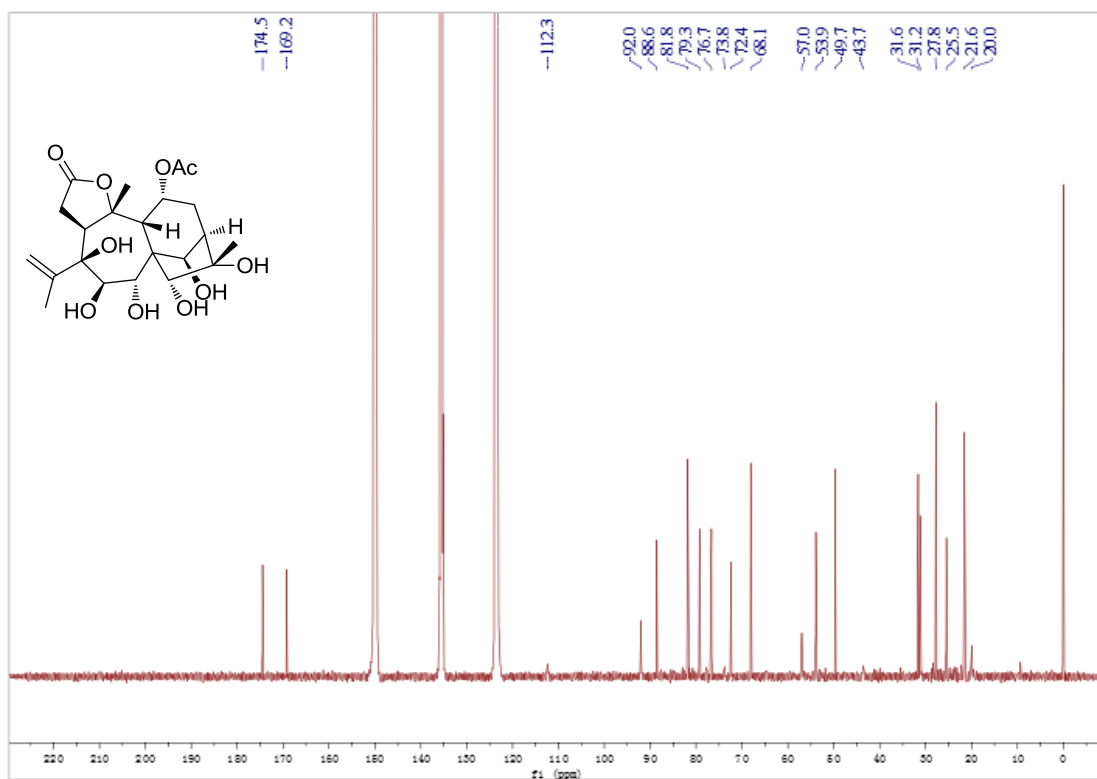

Figure S46.  $^{13}\text{C}$  NMR spectrum of **5** (150 MHz, in  $\text{C}_5\text{D}_5\text{N}$ )

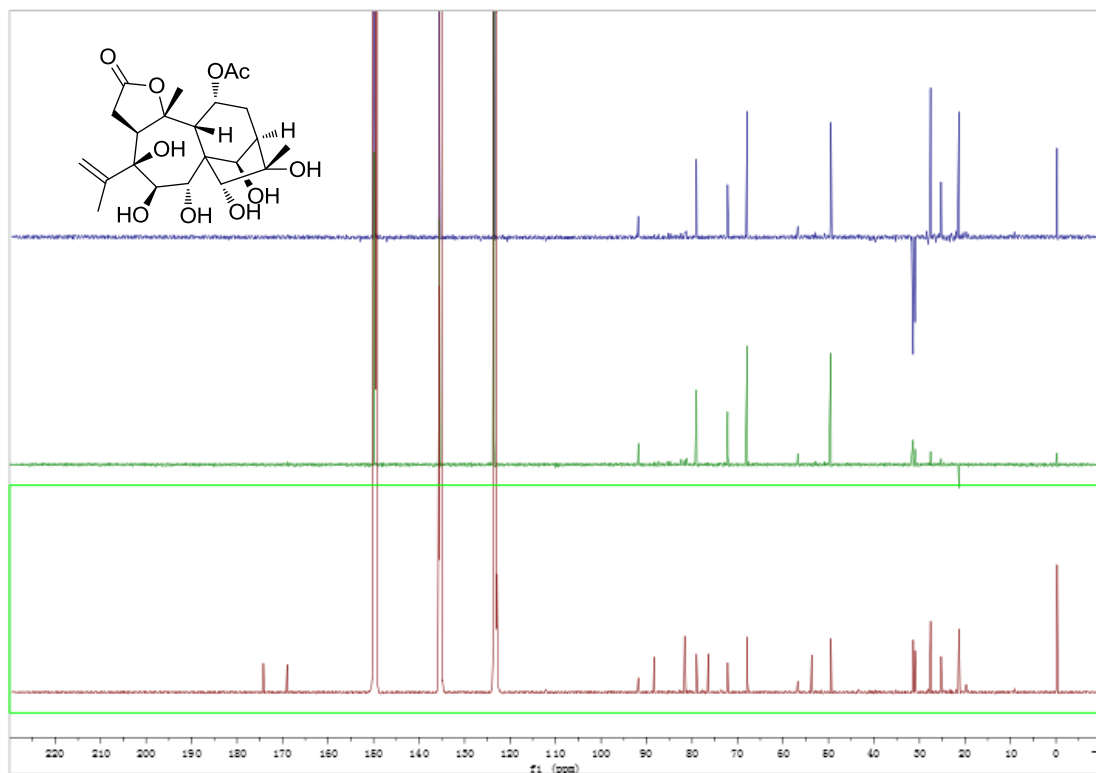

**Figure S47.** DEPT spectrum of **5** (150 MHz, in  $C_5D_5N$ )

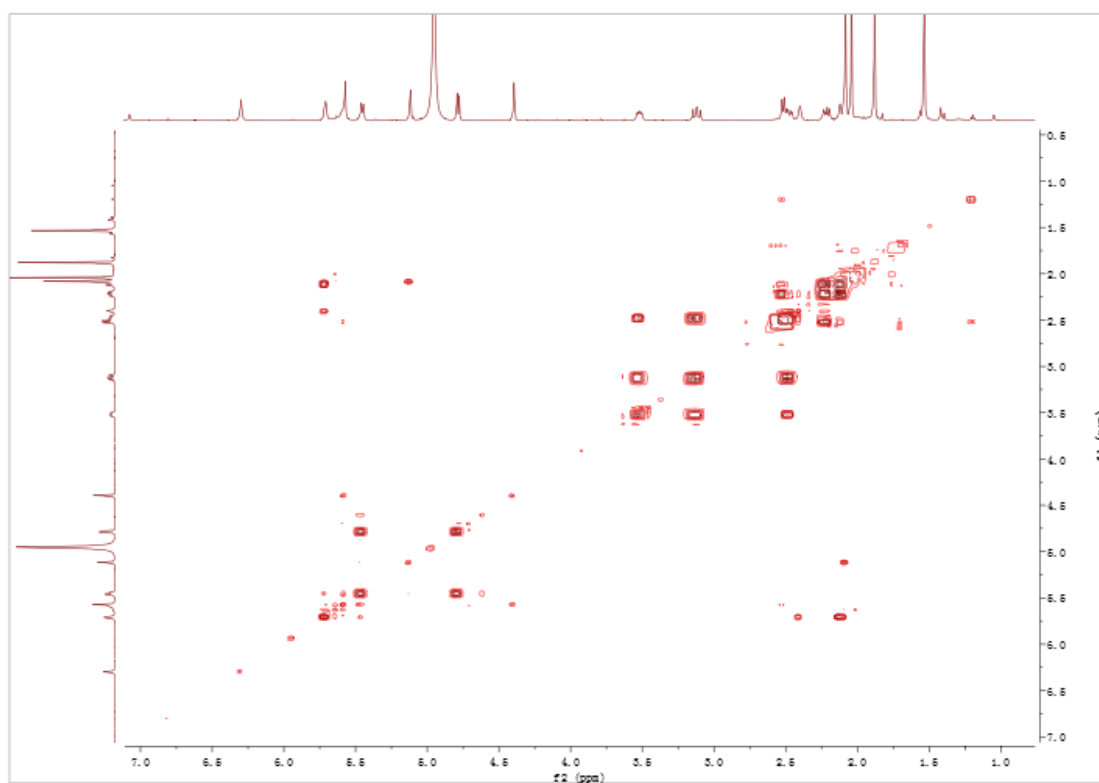

**Figure S48.**  $^1H$ - $^1H$  COSY spectrum of **5** (600 MHz, in  $C_5D_5N$ )

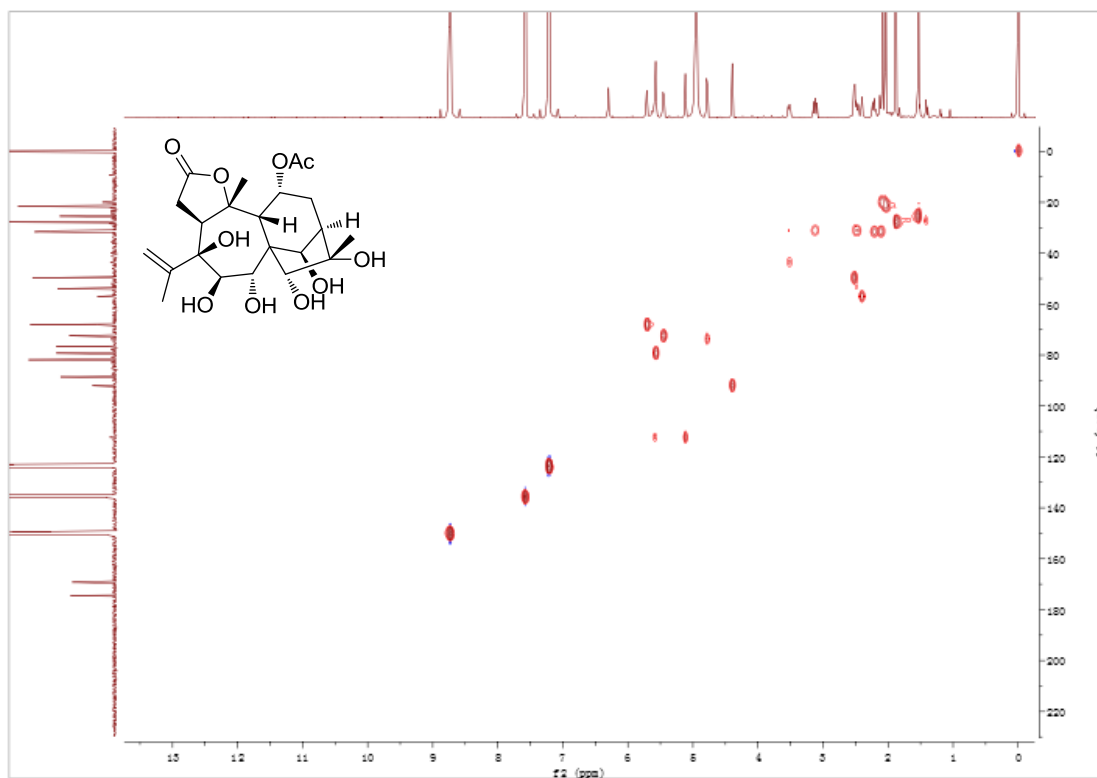

**Figure S49.** HSQC spectrum of **5** (600 MHz, in  $C_5D_5N$ )

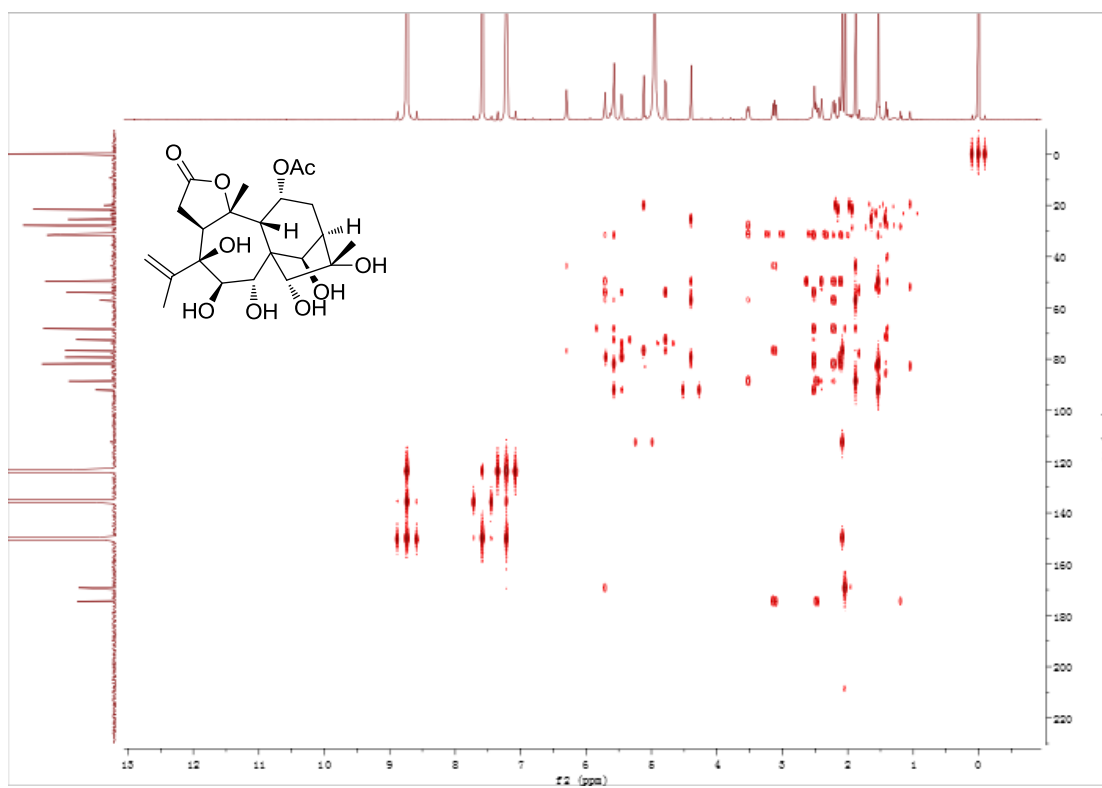

**Figure S50.** HMBC spectrum of **5** (600 MHz, in  $C_5D_5N$ )

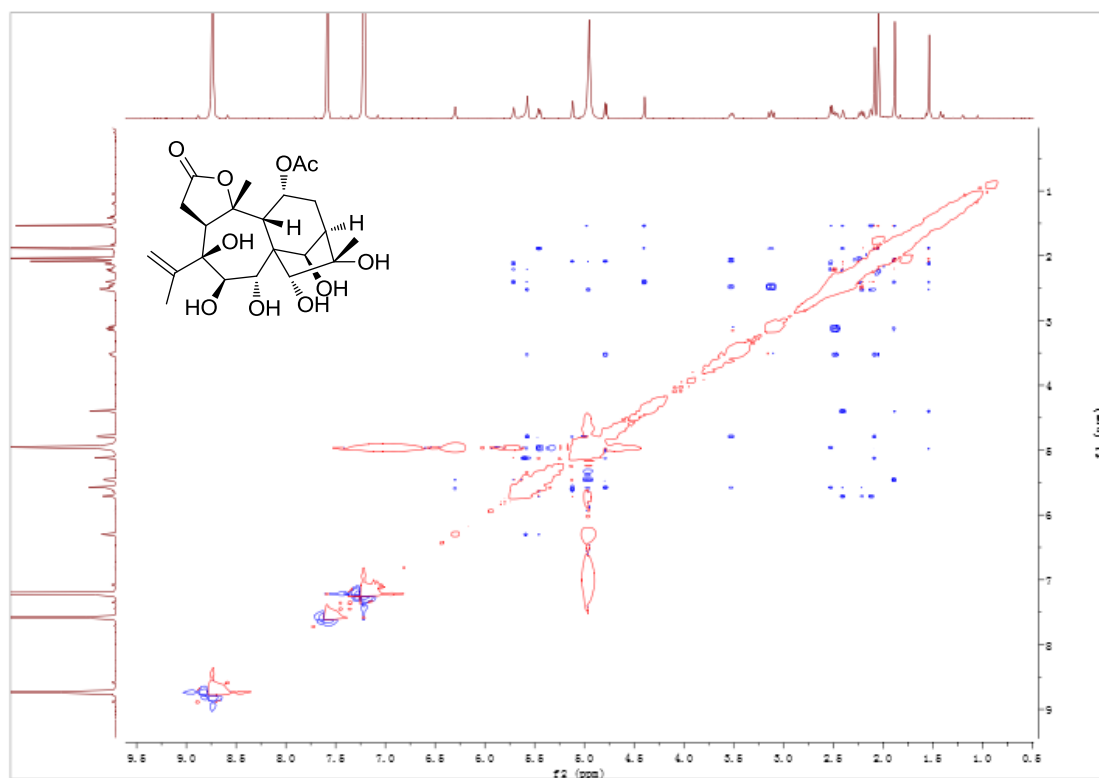

Figure S51. NOESY spectrum of **5** (600 MHz, in  $C_5D_5N$ )

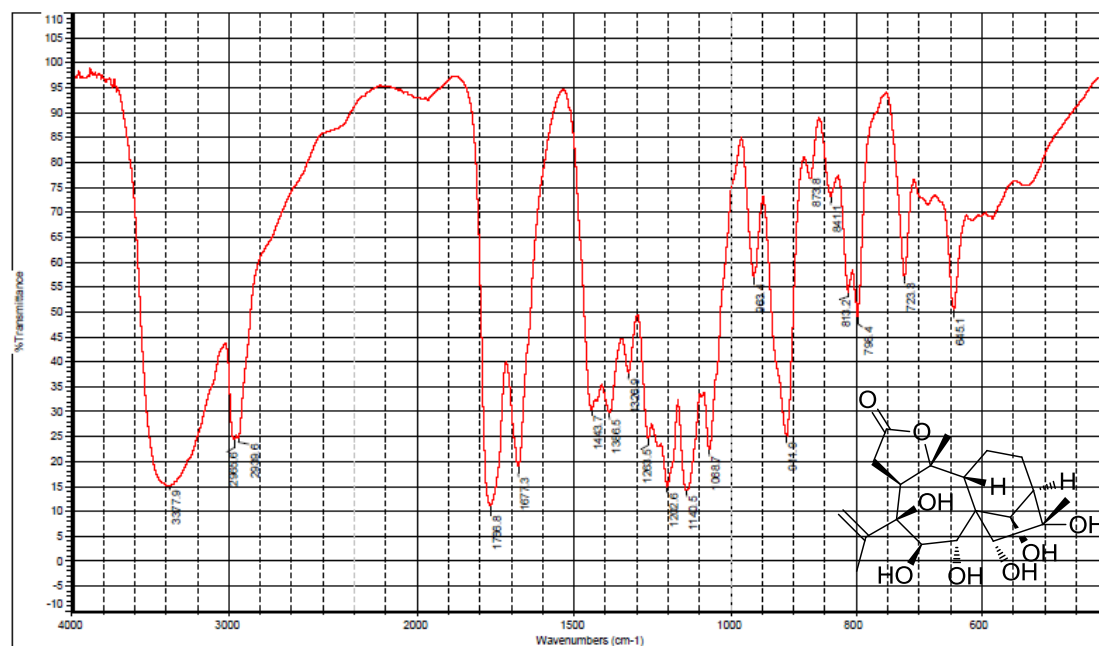

Figure S52. IR spectrum of **6**

MS Formula Results: + Scan (5.098 min) Sub (2016111001.d)

| m/z      | Ion                 | Formula          | Abundance |           |          |            |           |            |                 |            |             |               |     |
|----------|---------------------|------------------|-----------|-----------|----------|------------|-----------|------------|-----------------|------------|-------------|---------------|-----|
| 421.1831 | (M+Na) <sup>+</sup> | C20 H30 Na O8    | 314907.9  |           |          |            |           |            |                 |            |             |               |     |
| Best     | Formula (M)         | Ion Formula      | Score     | Cross Sto | Mass     | Calc. Mass | Calc. m/z | Diff (ppm) | Alts Diff (ppm) | Mass Match | Abund Match | Spacing Match | DBE |
|          | C20 H30 O8          | C20 H30 Na O8    | 99.91     |           | 396.1939 | 396.1941   | 421.1833  | 0.38       | 0.36            | 100        | 99.84       | 99.84         | 6   |
|          | C24 H30 O3 S        | C24 H30 Na O3 S  | 96.05     |           | 398.1939 | 398.1916   | 421.1808  | -5.91      | 5.91            | 96.96      | 95.13       | 99.71         | 10  |
|          | C21 H34 O3 S2       | C21 H34 Na O3 S2 | 97.26     |           | 398.1939 | 398.1949   | 421.1842  | 2.55       | 2.55            | 99.81      | 91.11       | 99.52         | 5   |

Figure S53. (+)-HRESIMS data of **6**

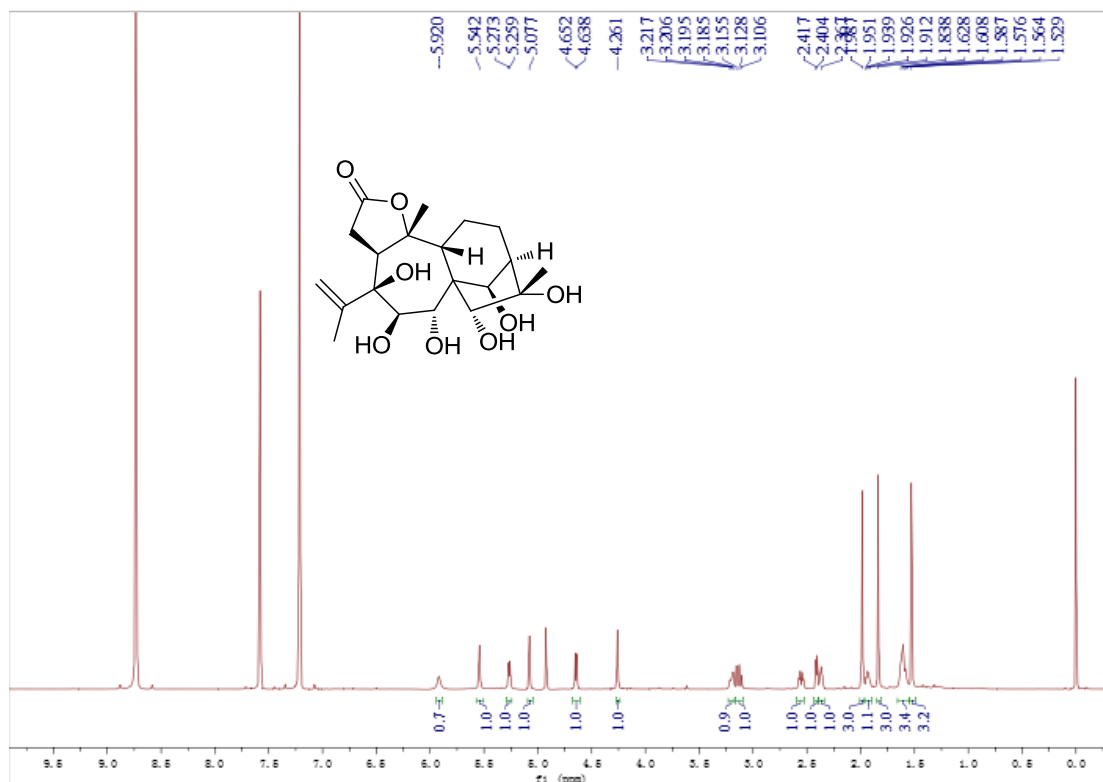

**Figure S54.** <sup>1</sup>H NMR spectrum of **6** (600 MHz, in C<sub>5</sub>D<sub>5</sub>N)

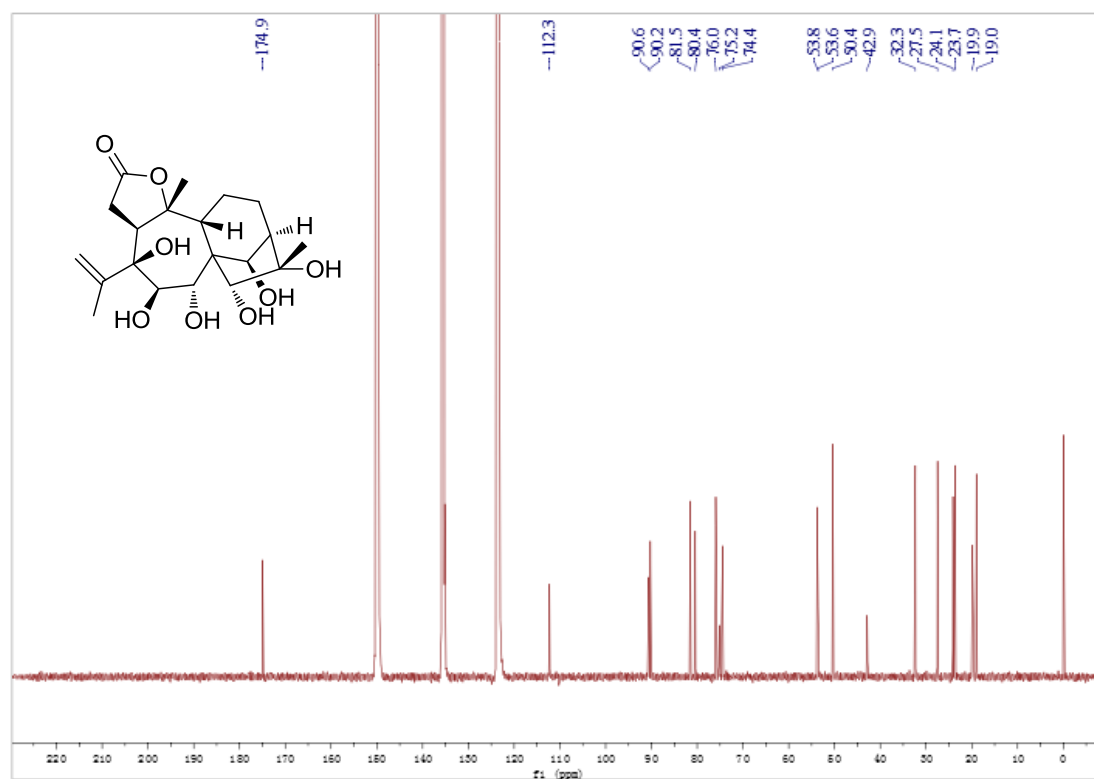

**Figure S55.** <sup>13</sup>C NMR spectrum of **6** (150 MHz, in C<sub>5</sub>D<sub>5</sub>N)

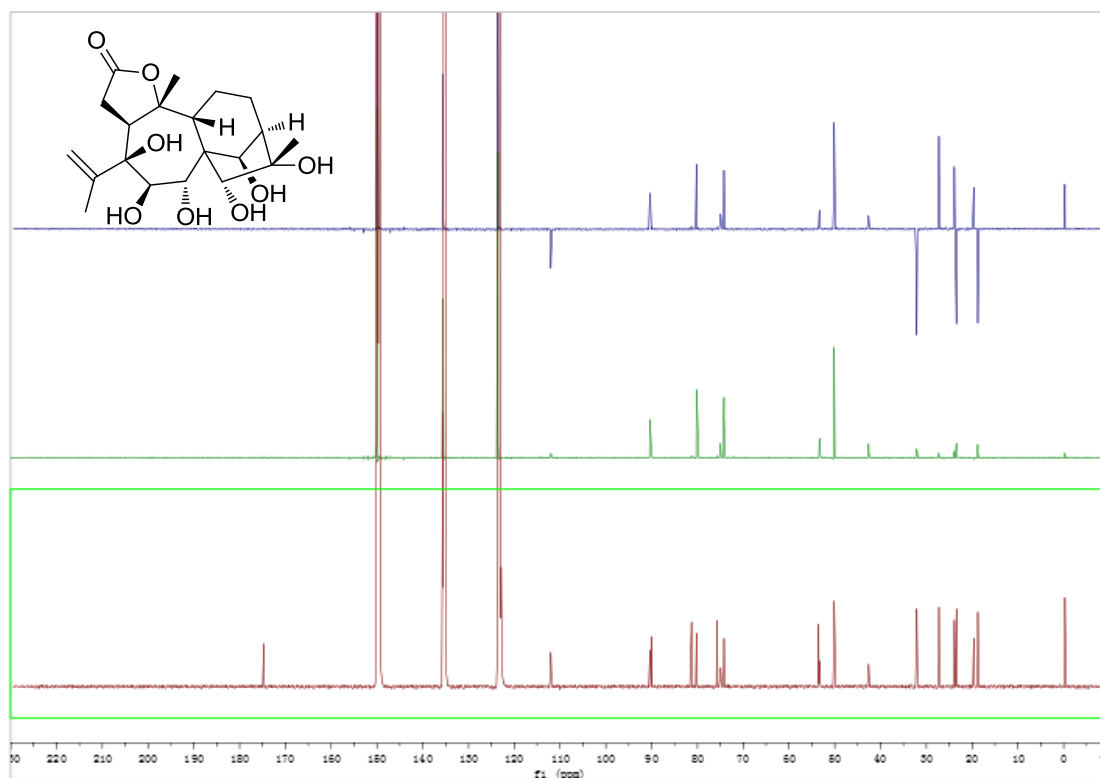

**Figure S56.** DEPT spectrum of **6** (150 MHz, in  $\text{C}_5\text{D}_5\text{N}$ )

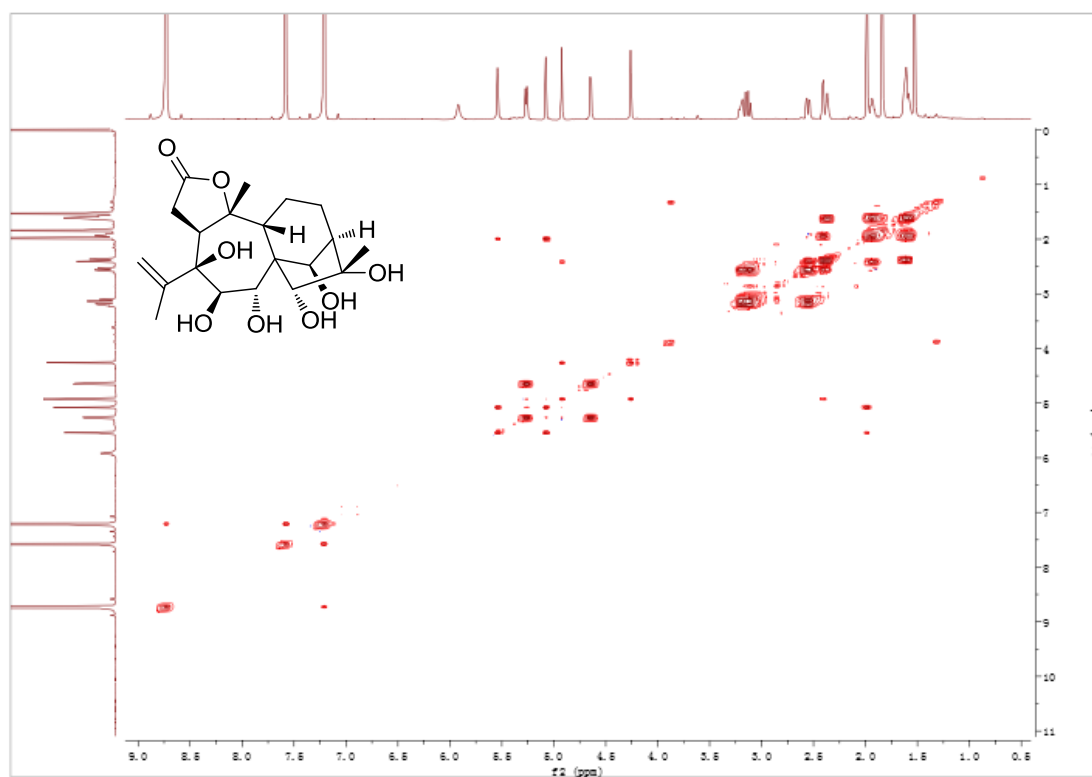

**Figure S57.**  $^1\text{H}$ - $^1\text{H}$  COSY spectrum of **6** (600 MHz, in  $\text{C}_5\text{D}_5\text{N}$ )



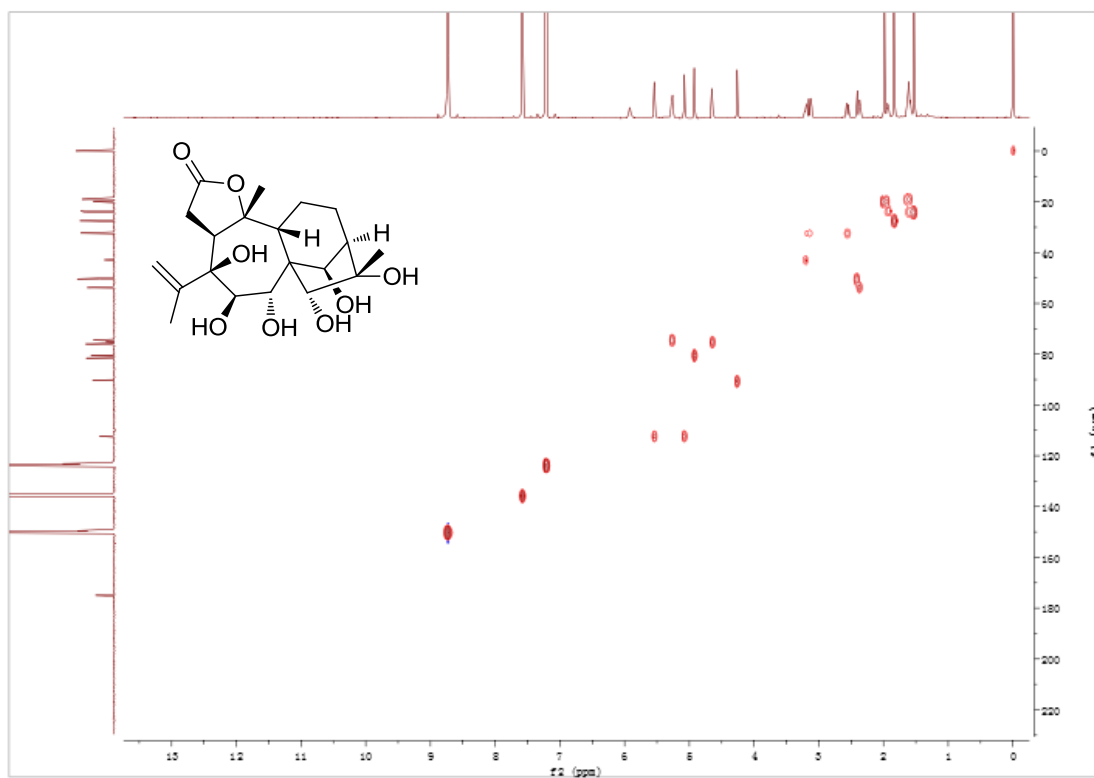

**Figure S58.** HSQC spectrum of **6** (600 MHz, in C<sub>5</sub>D<sub>5</sub>N)

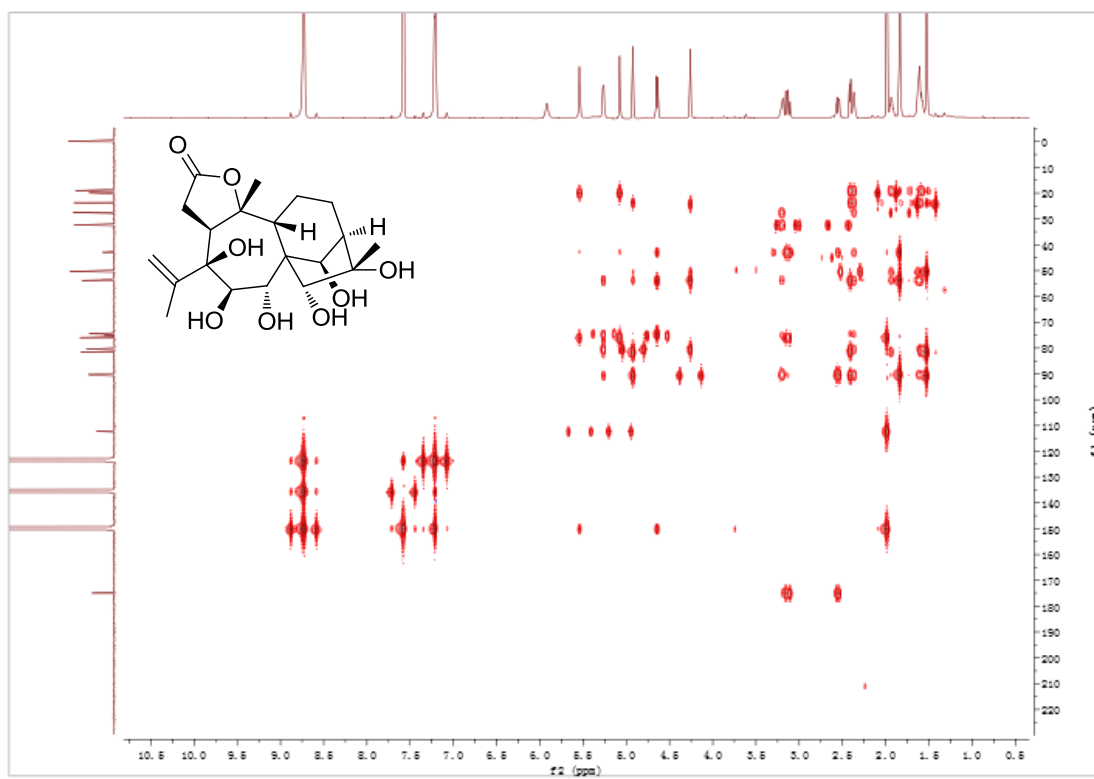

**Figure S59.** HMBC spectrum of **6** (600 MHz, in C<sub>5</sub>D<sub>5</sub>N)

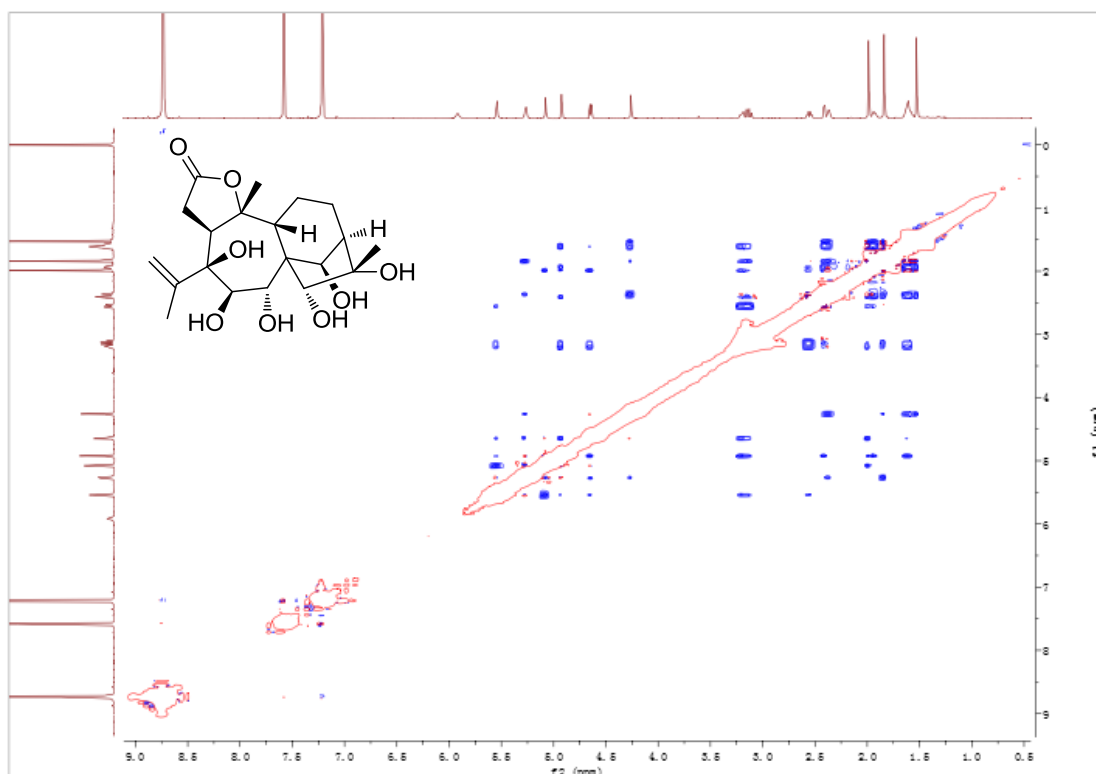

Figure S60. NOESY spectrum of **6** (600 MHz, in  $C_5D_5N$ )

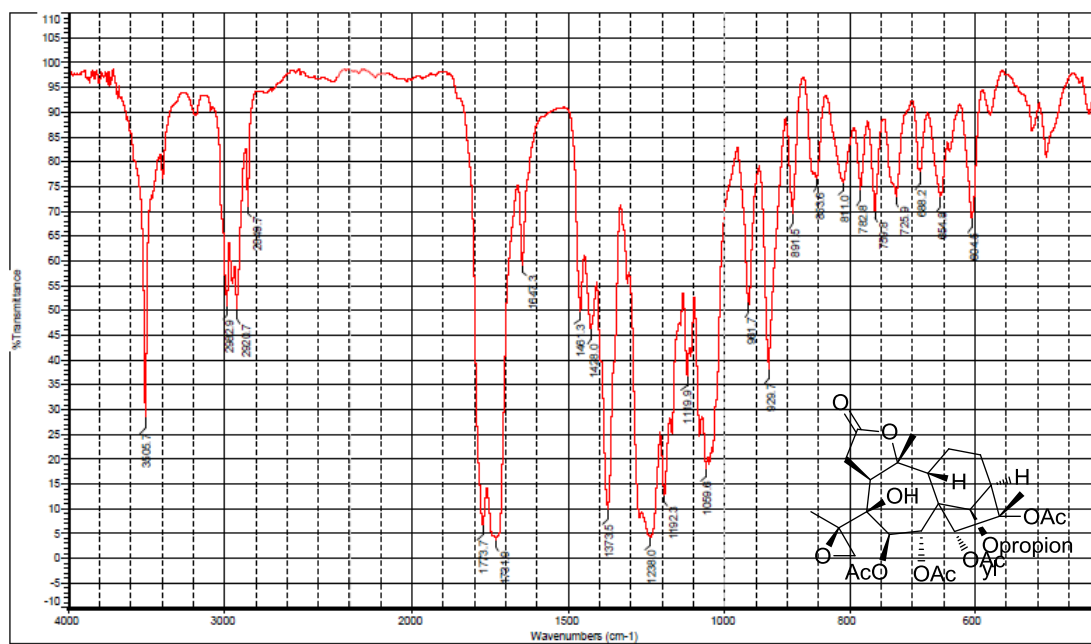

Figure S61. IR spectrum of **7**

MS Formula Results: + Scan (6.499 min) Sub (2015091706.d)

| m/z      | Ion                 | Formula                                           | Abundance |
|----------|---------------------|---------------------------------------------------|-----------|
| 661.2478 | (M+Na) <sup>+</sup> | C <sub>31</sub> H <sub>42</sub> NaO <sub>14</sub> | 882556.8  |

  

| Ret <sup>1</sup> | Formula (M) | Ion Formula                                                   | Score | Cross sco | Mass     | Calc. Mass | Calc. m/z | Diff (ppm) | Abs Diff (ppm) | Mass Match | Abund Match | Spacing Match | DBE |
|------------------|-------------|---------------------------------------------------------------|-------|-----------|----------|------------|-----------|------------|----------------|------------|-------------|---------------|-----|
| +                | [-]         | C <sub>31</sub> H <sub>42</sub> NaO <sub>14</sub>             | 99.99 |           | 638.2585 | 638.2575   | 661.2487  | -1.7       | 1.7            | 99.9       | 99.98       | 99.89         | 11  |
| +                | [-]         | C <sub>32</sub> H <sub>38</sub> NaO <sub>10</sub>             | 99.83 |           | 638.2585 | 638.2588   | 661.248   | 0.38       | 0.38           | 100        | 99.49       | 99.92         | 16  |
| +                | [-]         | C <sub>27</sub> H <sub>38</sub> NaO <sub>12</sub>             | 99.35 |           | 638.2585 | 638.2546   | 661.244   | -5.94      | 5.94           | 88.84      | 99.71       | 99.98         | 12  |
| +                | [-]         | C <sub>20</sub> H <sub>42</sub> NaO <sub>17</sub>             | 98.11 |           | 638.2585 | 638.2606   | 661.2499  | 3.26       | 3.26           | 99.65      | 91.99       | 99.99         | 3   |
| +                | [-]         | C <sub>44</sub> H <sub>34</sub> N <sub>2</sub> O <sub>3</sub> | 97.08 |           | 638.2585 | 638.2569   | 661.2462  | -2.51      | 2.51           | 99.79      | 90.25       | 99.85         | 29  |
| +                | [-]         | C <sub>49</sub> H <sub>34</sub> O                             | 95.45 |           | 638.2585 | 638.281    | 661.2922  | 3.8        | 3.8            | 99.52      | 85.02       | 99.82         | 33  |

Figure S62. (+)-HRESIMS data of **7**

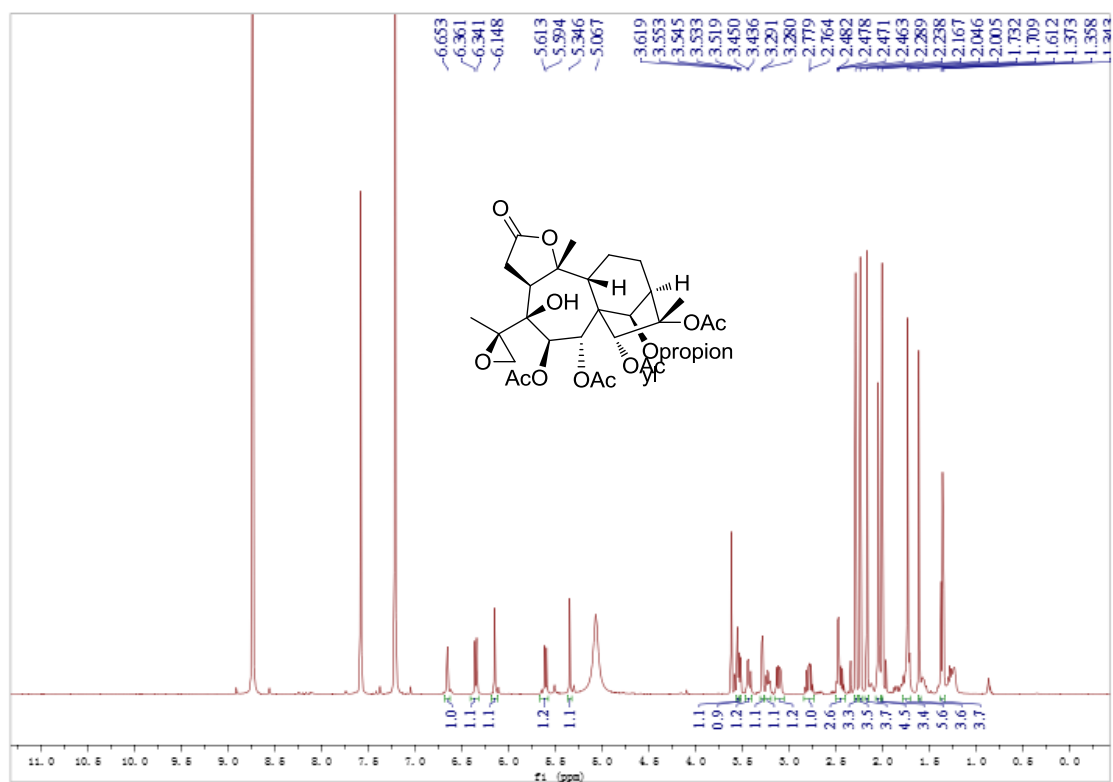

**Figure S63.**  $^1\text{H}$  NMR spectrum of **7** (500 MHz, in  $\text{C}_5\text{D}_5\text{N}$ )

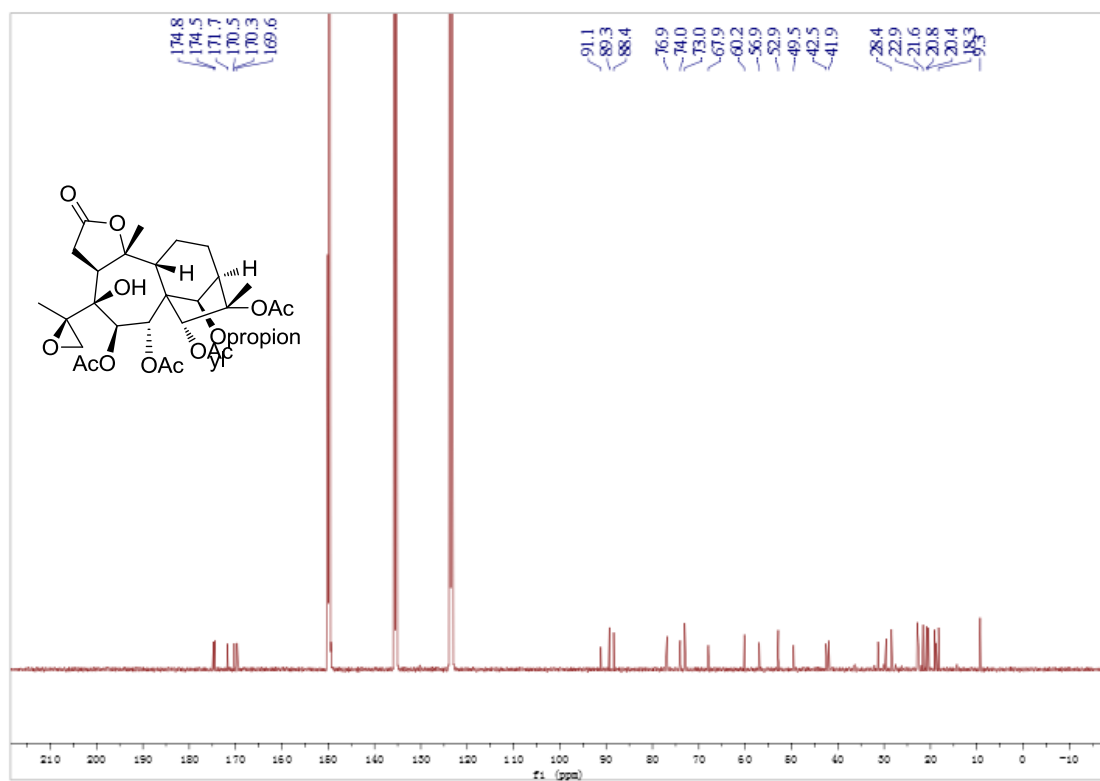

**Figure S64.**  $^{13}\text{C}$  NMR spectrum of **7** (125 MHz, in  $\text{C}_5\text{D}_5\text{N}$ )

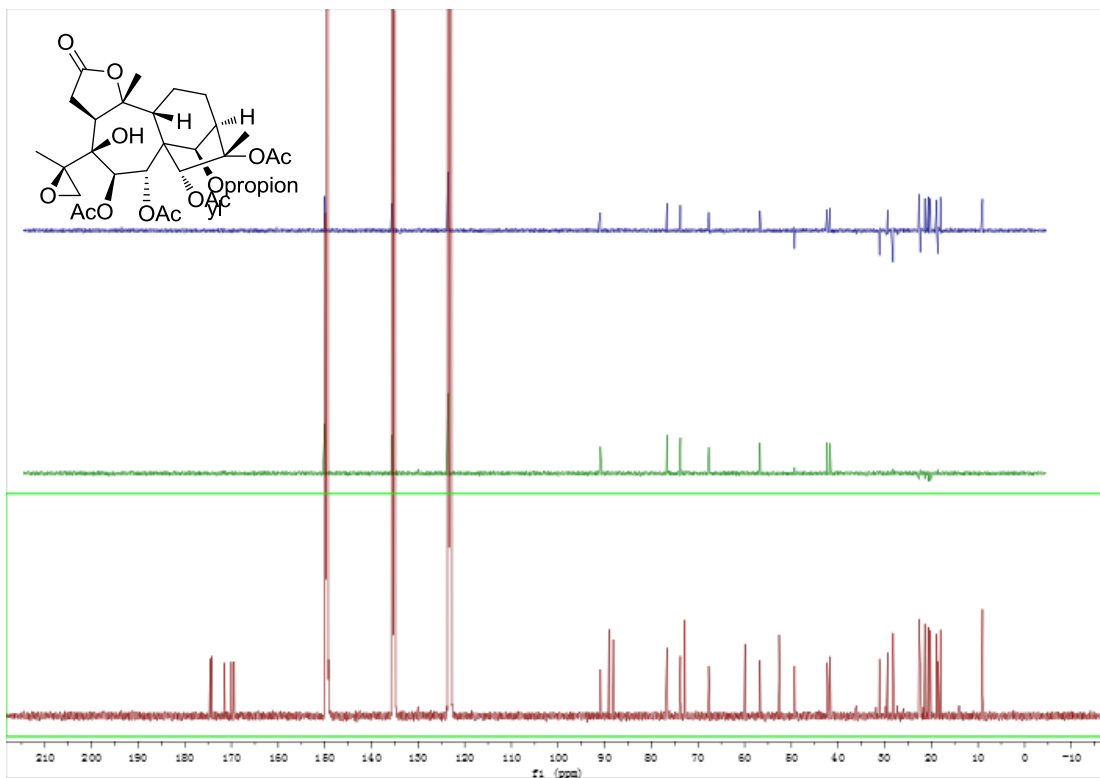

**Figure S65.** DEPT spectrum of **7** (125 MHz, in  $C_5D_5N$ )

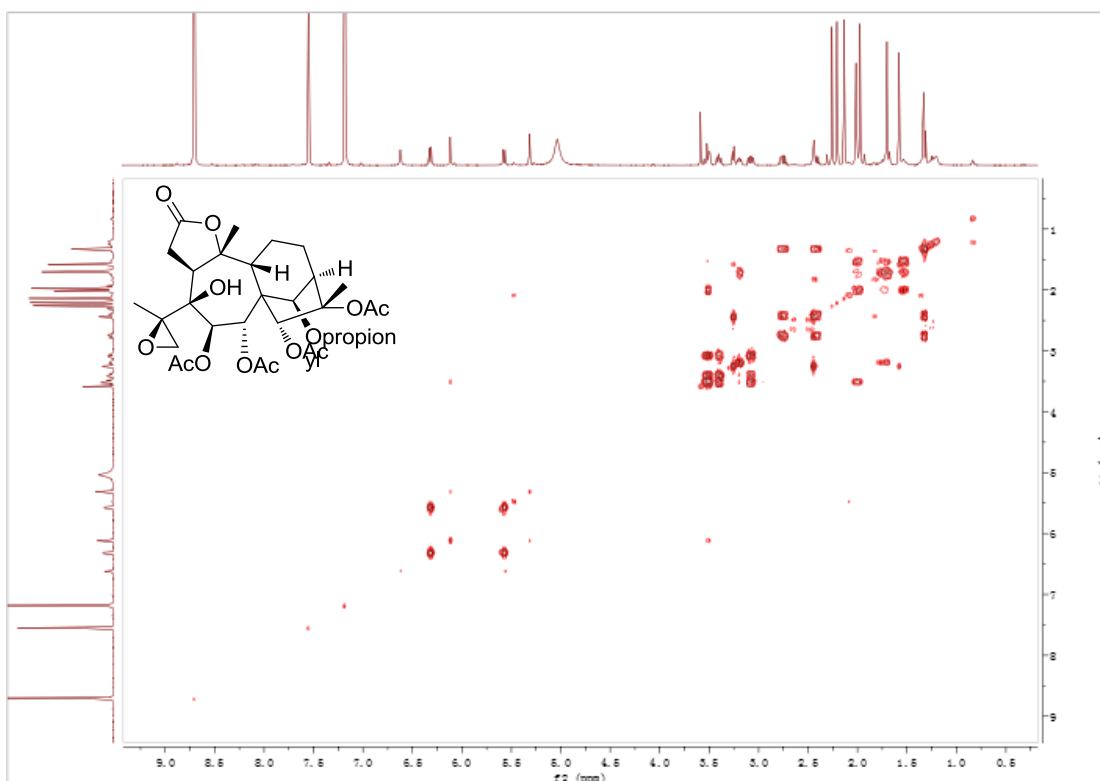

**Figure S66.**  $^1H$ - $^1H$  COSY spectrum of **7** (500 MHz, in  $C_5D_5N$ )

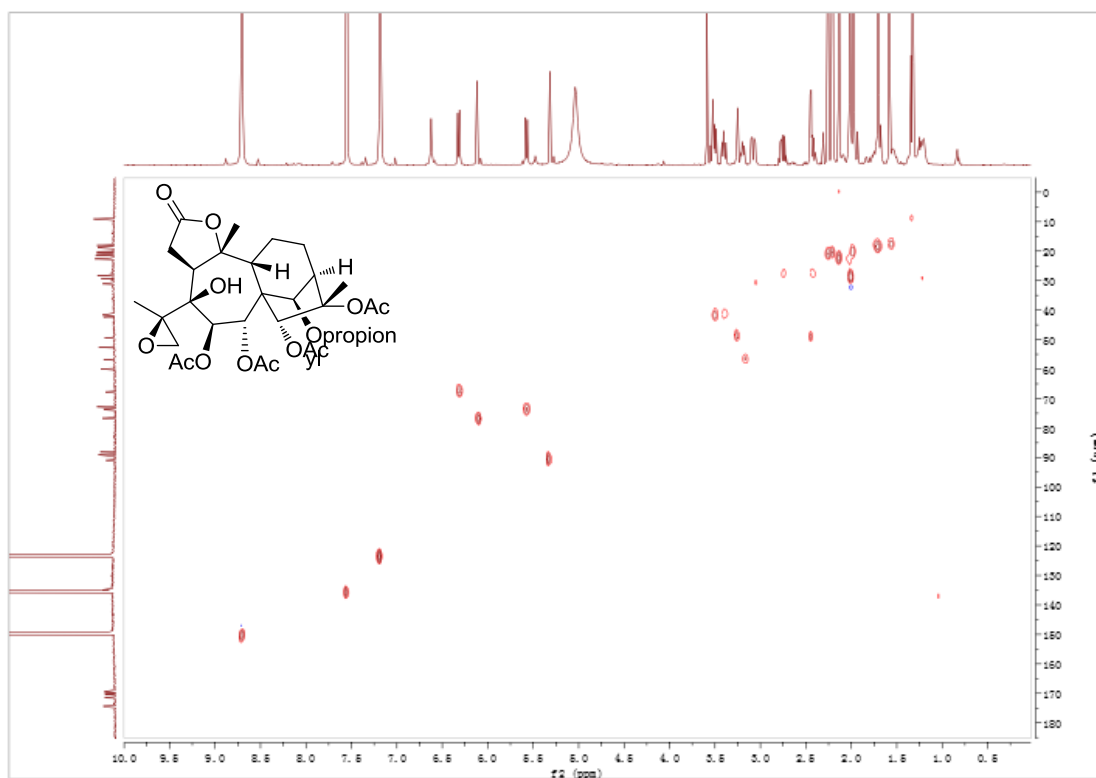

**Figure S67.** HSQC spectrum of **7** (500 MHz, in C<sub>5</sub>D<sub>5</sub>N)

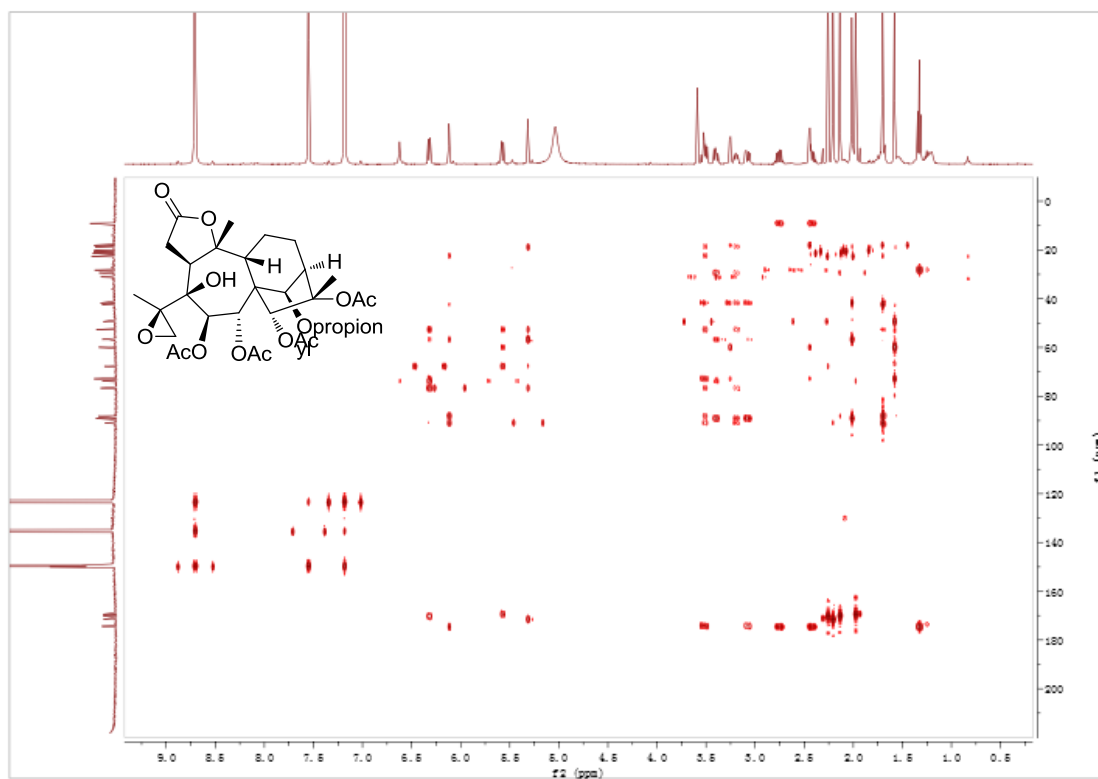

**Figure S68.** HMBC spectrum of **7** (500 MHz, in C<sub>5</sub>D<sub>5</sub>N)

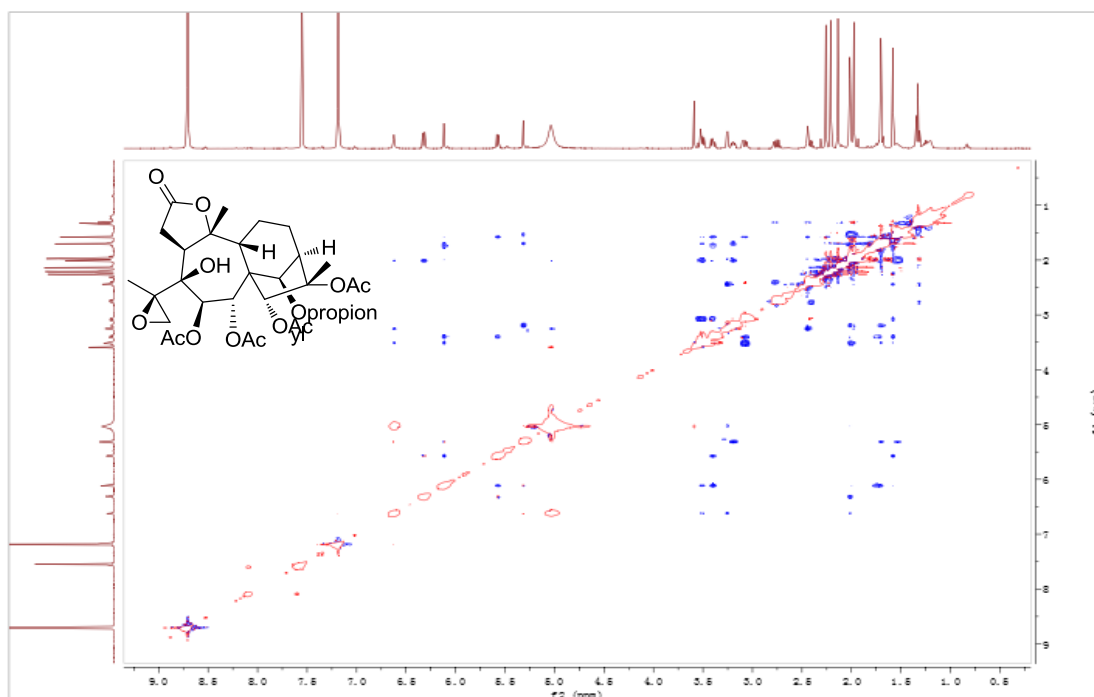

**Figure S69.** NOESY spectrum of **7** (500 MHz, in  $C_5D_5N$ )

**Table S2.** Crystal data and structure refinement for **7**

|                                                                                         |                                                   |
|-----------------------------------------------------------------------------------------|---------------------------------------------------|
| Identification code                                                                     | exp_3590                                          |
| Empirical formula                                                                       | $C_{32}H_{42}O_{15}$ .26177                       |
| Formula weight                                                                          | 670.84                                            |
| Temperature/K                                                                           | 102.8                                             |
| Crystal system                                                                          | orthorhombic                                      |
| Space group                                                                             | $P2_12_12_1$                                      |
| a / Å, b / Å, c / Å                                                                     | 12.7605(3), 15.5108(5), 16.9324(4)                |
| $\alpha/^\circ, \beta/^\circ, \gamma/^\circ$                                            | 90, 90, 90                                        |
| Volume/Å <sup>3</sup>                                                                   | 3351.35(16)                                       |
| Z                                                                                       | 4                                                 |
| $\rho_{\text{calc}}/\text{mg mm}^{-3}$                                                  | 1.330                                             |
| $\mu/\text{mm}^{-1}$                                                                    | 0.900                                             |
| F(000)                                                                                  | 1424                                              |
| Crystal size/mm <sup>3</sup>                                                            | 0.450 × 0.400 × 0.400                             |
| 2 $\theta$ range for data collection                                                    | 7.73 to 141.822°                                  |
| Index ranges                                                                            | -15 ≤ h ≤ 15, -17 ≤ k ≤ 16, -12 ≤ l ≤ 20          |
| Reflections collected                                                                   | 12021                                             |
| Independent reflections                                                                 | 6334[R(int) = 0.0234 (inf-0.9Å)]                  |
| Data/restraints/parameters                                                              | 6334/0/462                                        |
| Goodness-of-fit on F <sup>2</sup>                                                       | 1.031                                             |
| Final R indexes [I > 2 $\sigma$ (I) i.e. F <sub>o</sub> > 4 $\sigma$ (F <sub>o</sub> )] | R <sub>1</sub> = 0.0366, wR <sub>2</sub> = 0.0931 |
| Final R indexes [all data]                                                              | R <sub>1</sub> = 0.0388 wR <sub>2</sub> = 0.0951  |
| Largest diff. peak/hole/e Å <sup>-3</sup>                                               | 0.199/-0.300                                      |
| Flack Parameters                                                                        | 0.04(7)                                           |
| Completeness                                                                            | 1.000                                             |

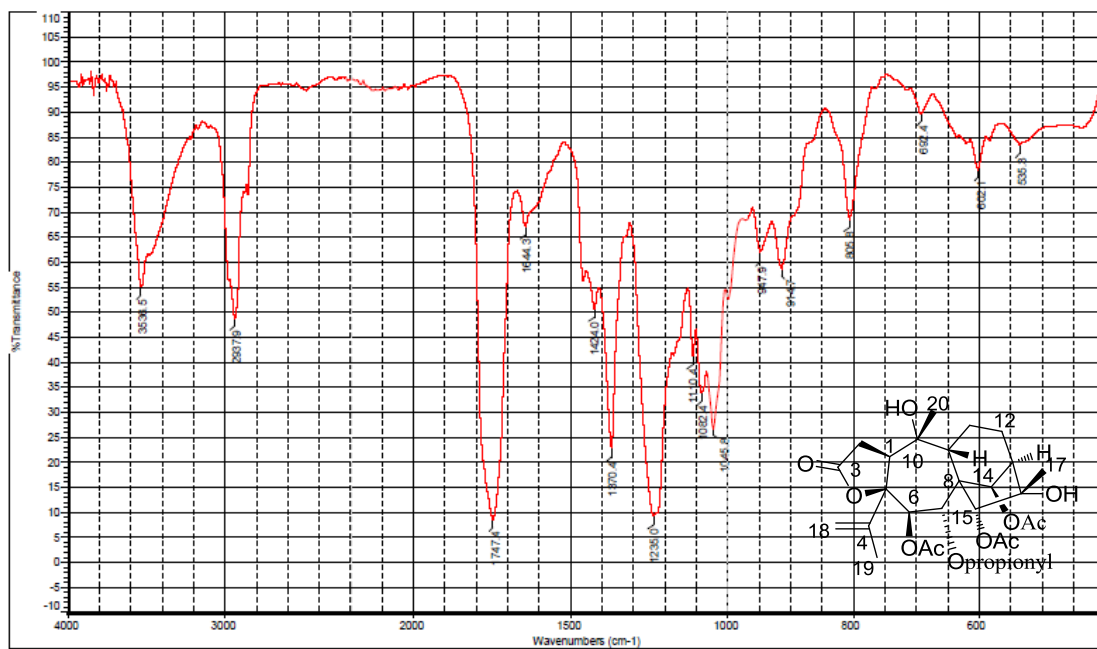

Figure S70. IR spectrum of **8**

MS Formula Results: + Scan (6.106 min) Sub (2015070701.d)

| m/z      | Ion                 | Formula                                           | Abundance |
|----------|---------------------|---------------------------------------------------|-----------|
| 603.2398 | (M+Na) <sup>+</sup> | C <sub>29</sub> H <sub>40</sub> NaO <sub>12</sub> | 176758    |

  

| Beat | Formula (M)                                                    | Ion Formula                                                      | Score | Cross Sco | Mass     | Calc. Mass | Calc. m/z | Diff (ppm) | Abs Diff (ppm) | Mass Match | Abund Match | Spacing Match | DBE |
|------|----------------------------------------------------------------|------------------------------------------------------------------|-------|-----------|----------|------------|-----------|------------|----------------|------------|-------------|---------------|-----|
| ✓    | C <sub>29</sub> H <sub>40</sub> O <sub>12</sub>                | C <sub>29</sub> H <sub>40</sub> NaO <sub>12</sub>                | 99.89 |           | 580.2506 | 580.252    | 603.2412  | 2.35       | 2.35           | 99.82      | 99.98       | 99.95         | 10  |
| +    | C <sub>25</sub> H <sub>36</sub> N <sub>6</sub> O <sub>10</sub> | C <sub>25</sub> H <sub>36</sub> N <sub>6</sub> NaO <sub>10</sub> | 99.77 |           | 580.2506 | 580.2493   | 603.2385  | -2.3       | 2.3            | 99.83      | 99.6        | 99.67         | 11  |
| +    | C <sub>30</sub> H <sub>36</sub> N <sub>4</sub> O <sub>8</sub>  | C <sub>30</sub> H <sub>36</sub> N <sub>4</sub> NaO <sub>8</sub>  | 99.5  |           | 580.2506 | 580.2533   | 603.2425  | 4.64       | 4.64           | 99.3       | 99.48       | 99.91         | 15  |
| +    | C <sub>24</sub> H <sub>40</sub> N <sub>2</sub> O <sub>14</sub> | C <sub>24</sub> H <sub>40</sub> N <sub>2</sub> NaO <sub>14</sub> | 99.24 |           | 580.2506 | 580.248    | 603.2372  | -4.99      | 4.99           | 99.32      | 98.95       | 99.93         | 6   |
| +    | C <sub>37</sub> H <sub>32</sub> N <sub>4</sub> O <sub>3</sub>  | C <sub>37</sub> H <sub>32</sub> N <sub>4</sub> NaO <sub>3</sub>  | 97.63 |           | 580.2506 | 580.2474   | 603.2367  | -5.48      | 5.48           | 99.03      | 94.47       | 99.91         | 24  |
| +    | C <sub>42</sub> H <sub>32</sub> N <sub>2</sub> O               | C <sub>42</sub> H <sub>32</sub> N <sub>2</sub> NaO               | 96.97 |           | 580.2506 | 580.2515   | 603.2407  | 1.46       | 1.46           | 99.93      | 89.57       | 99.91         | 28  |

Figure S71. (+)-HRESIMS data of **8**

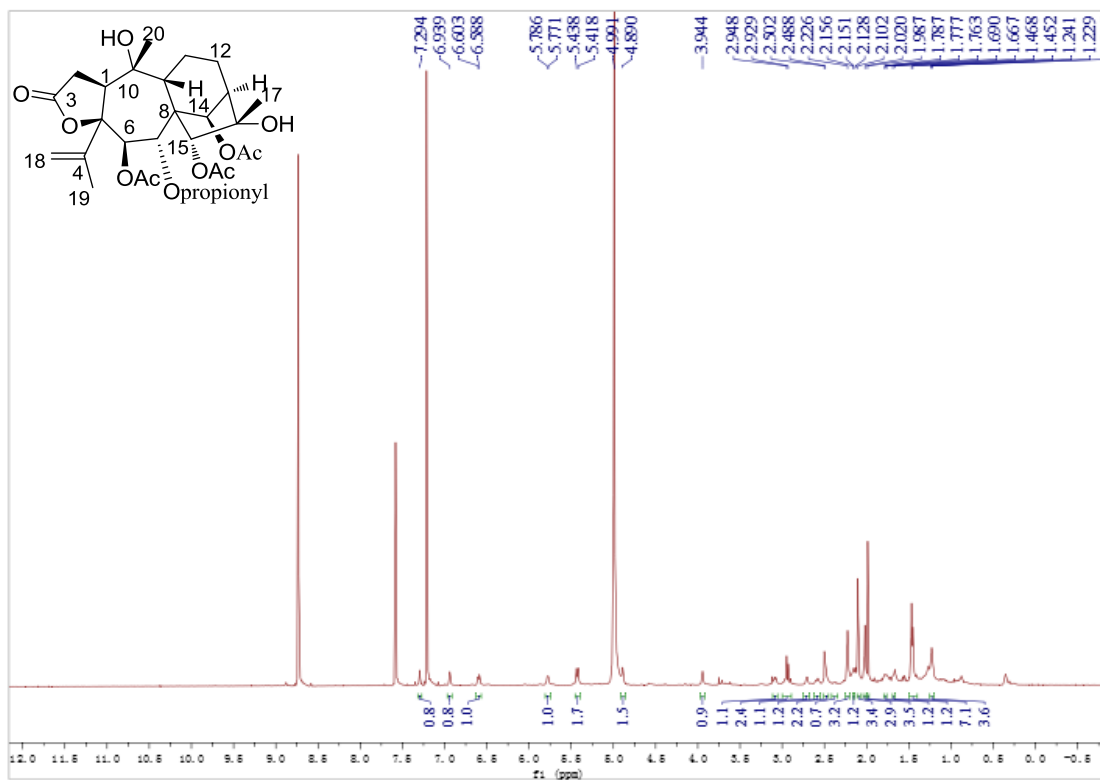

Figure S72. <sup>1</sup>H NMR spectrum of **8** (600 MHz, in C<sub>5</sub>D<sub>5</sub>N)

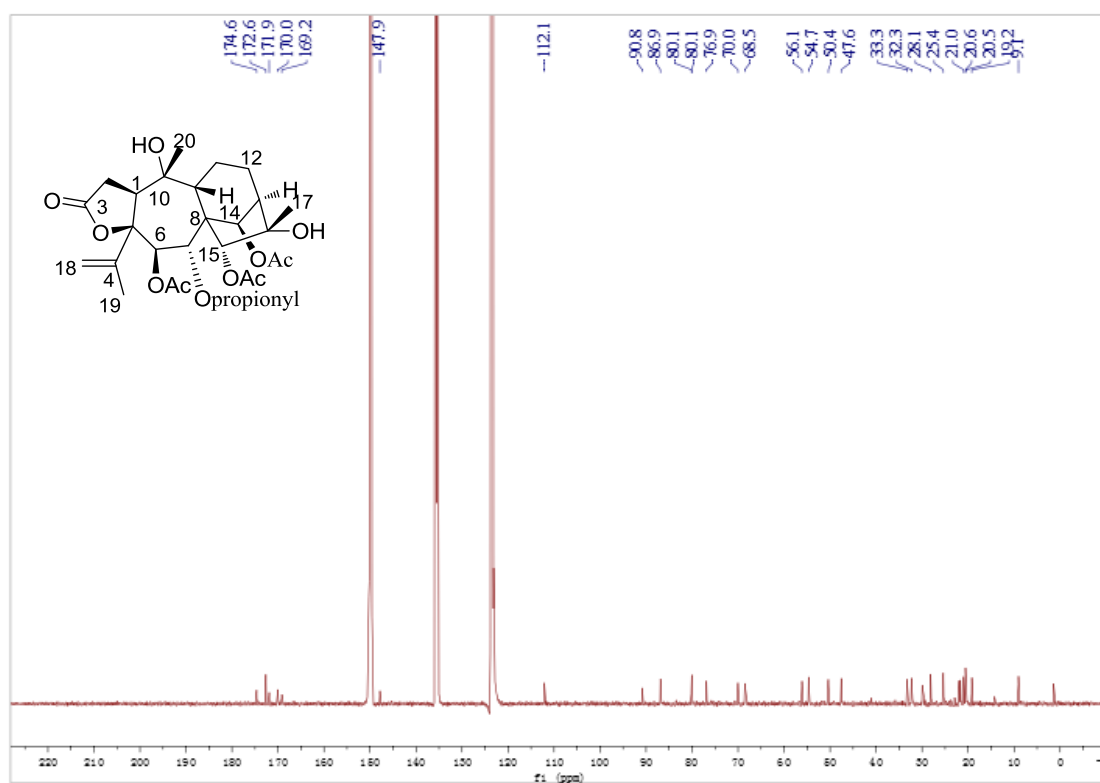

**Figure S73.** <sup>13</sup>C NMR spectrum of **8** (150 MHz, in C<sub>5</sub>D<sub>5</sub>N)

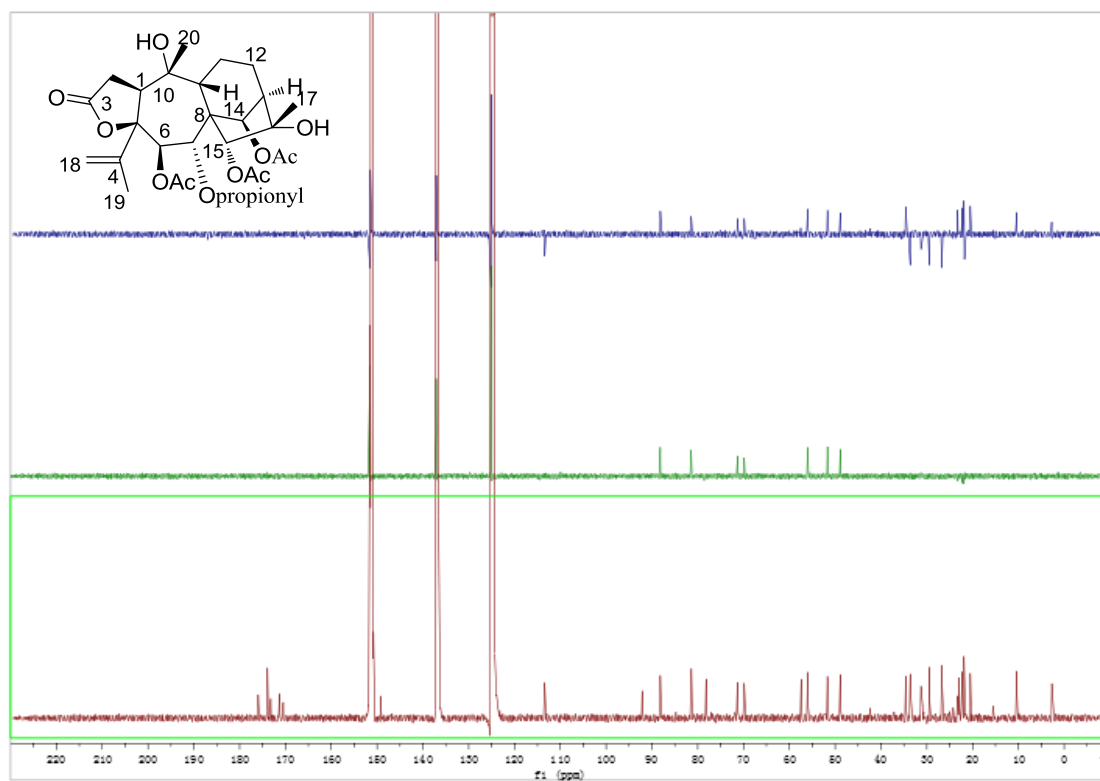

**Figure S74.** DEPT spectrum of **8** (150 MHz, in C<sub>5</sub>D<sub>5</sub>N)



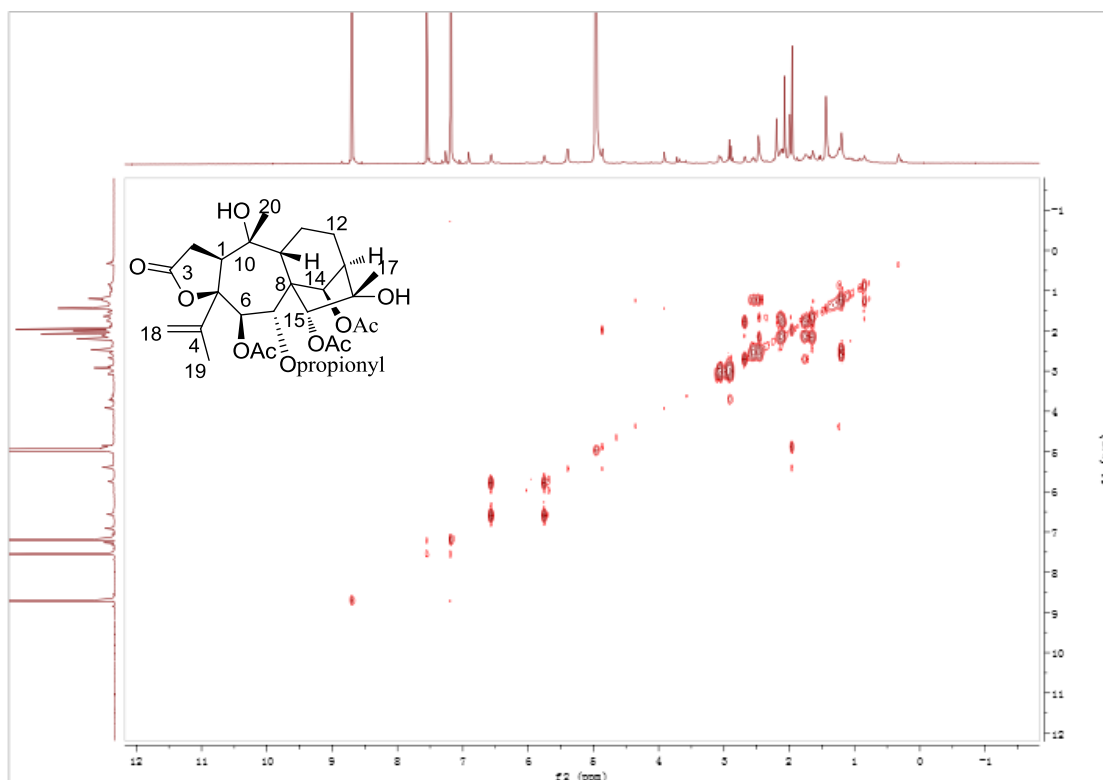

**Figure S75.**  $^1\text{H}$ - $^1\text{H}$  COSY spectrum of **8** (600 MHz, in  $\text{C}_5\text{D}_5\text{N}$ )

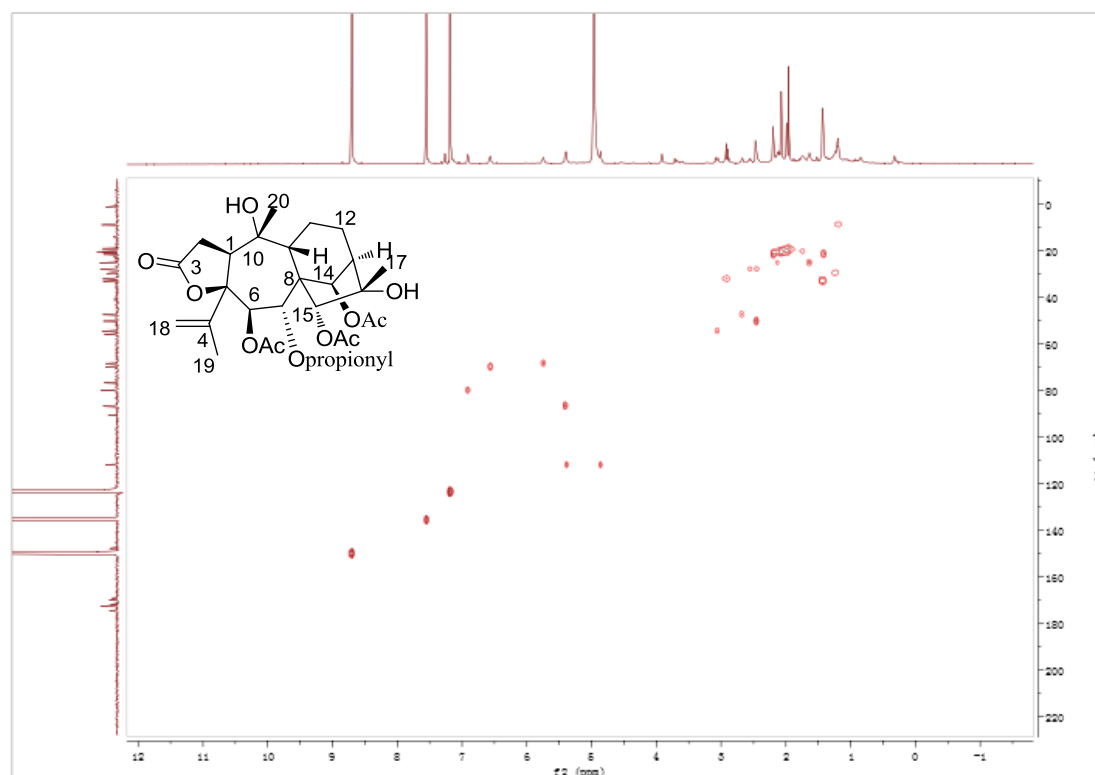

**Figure S76.** HSQC spectrum of **8** (600 MHz, in  $\text{C}_5\text{D}_5\text{N}$ )

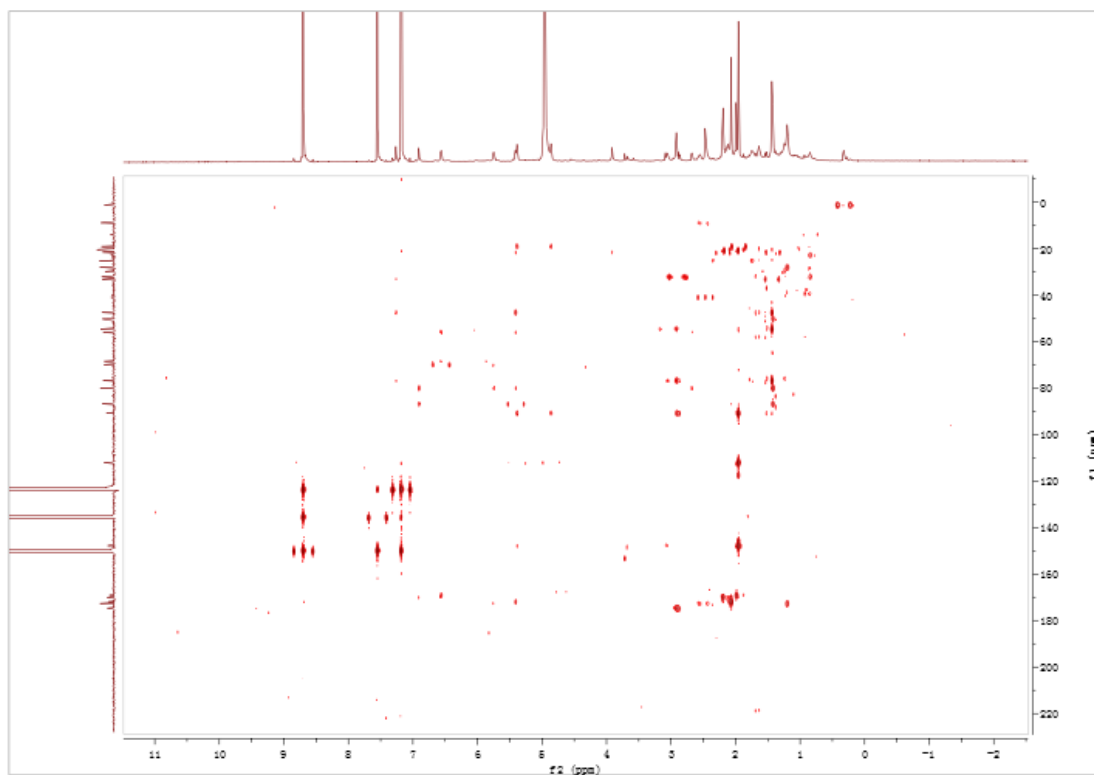

**Figure S77.** HMBC spectrum of **8** (600 MHz, in C<sub>5</sub>D<sub>5</sub>N)

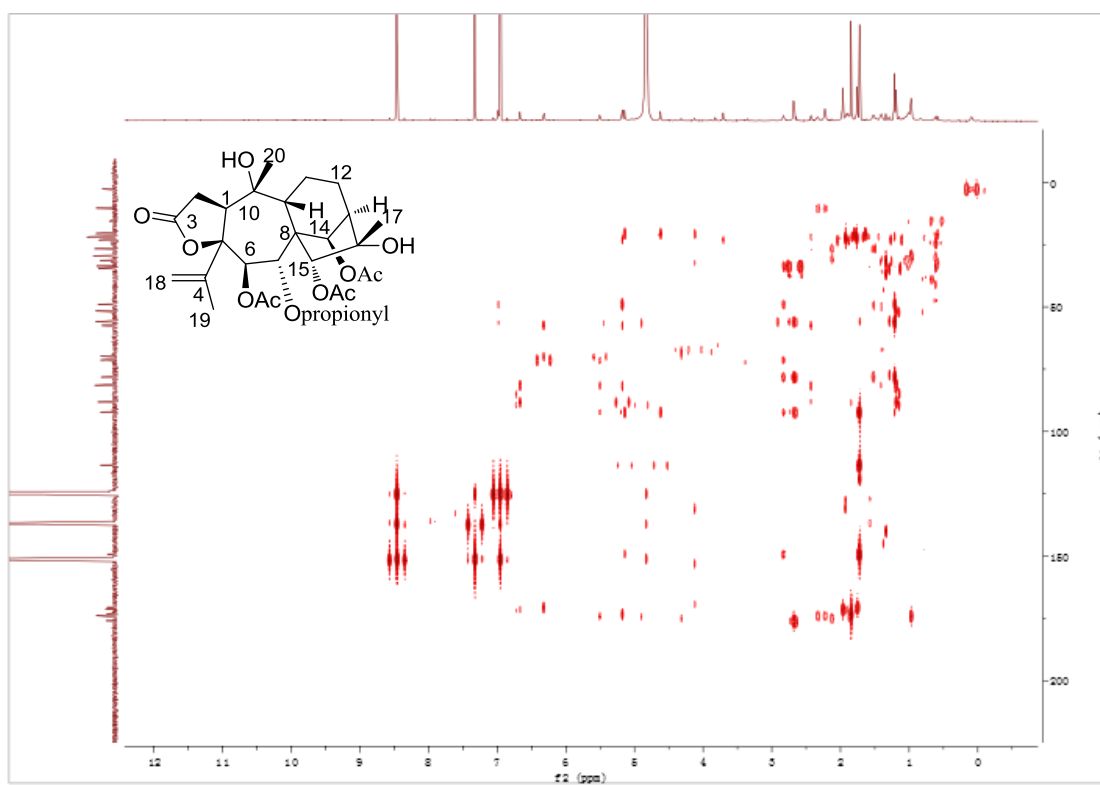

**Figure S78.** HMBC spectrum of **8** (800 MHz, in C<sub>5</sub>D<sub>5</sub>N)

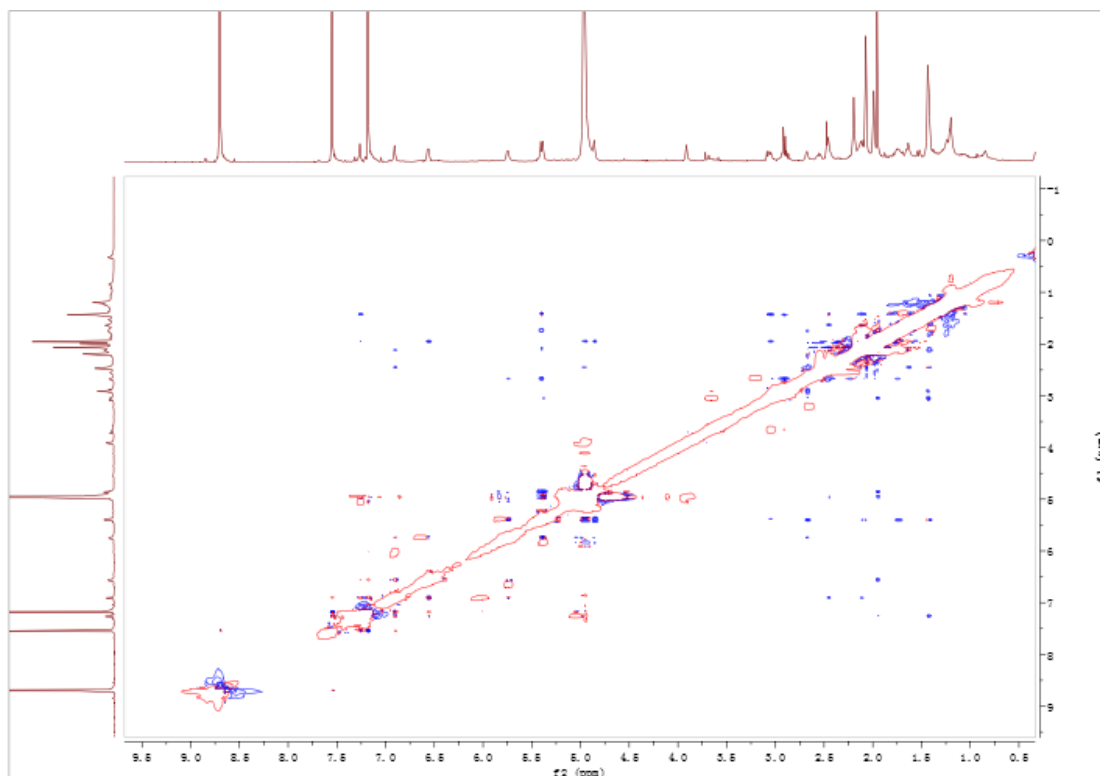

**Figure S79.** NOESY spectrum of **8** (600 MHz, in  $C_5D_5N$ )

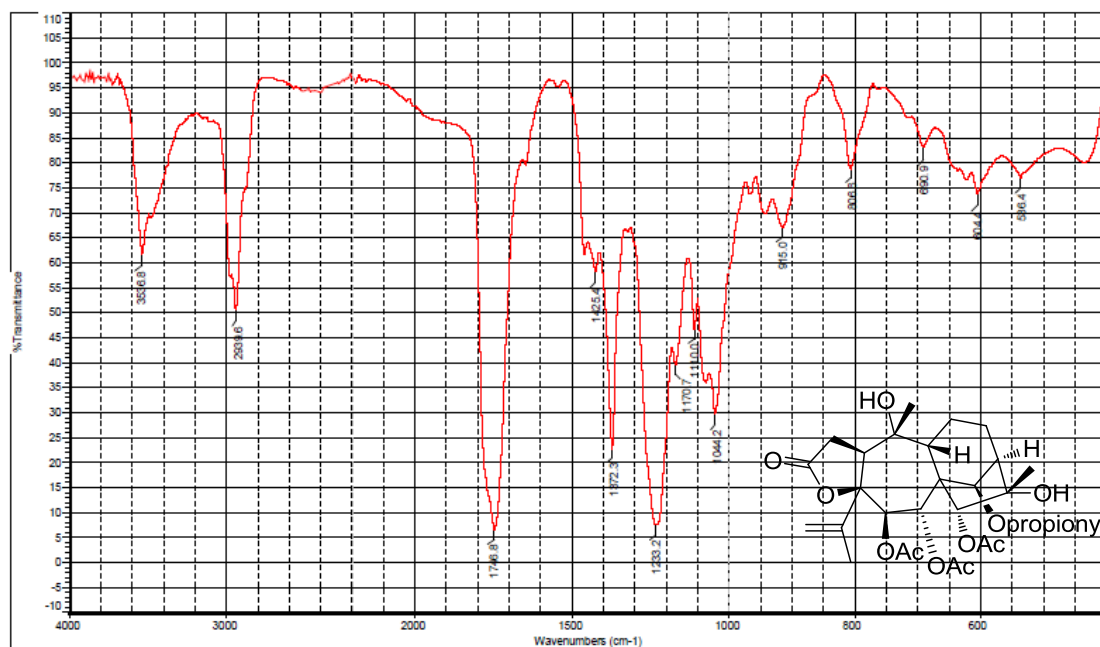

**Figure S80.** IR spectrum of **9**

MS Formula Results: + Scan (6.135 min) Sub (2015092209.d)

| m/z      | Ion                 | Formula               | Abundance |           |          |           |          |            |                |            |             |               |     |
|----------|---------------------|-----------------------|-----------|-----------|----------|-----------|----------|------------|----------------|------------|-------------|---------------|-----|
| 603.2417 | (M+Na) <sup>+</sup> | C29 H40 Na O12        | 236158.1  |           |          |           |          |            |                |            |             |               |     |
| Best     | Formula (M)         | Ion Formula           | Score     | Cross Sco | Mass     | Calc Mass | Calc m/z | Diff (ppm) | Abs Diff (ppm) | Mass Match | Abund Match | Spacing Match | DBE |
| +        | C29 H40 O12         | C29 H40 Na O12        | 99.91     |           | 580.2525 | 580.252   | 603.2412 | -0.9       | 0.9            | 99.97      | 99.77       | 99.95         | 10  |
| +        | C30 H36 N4 O4       | C30 H36 Na O4         | 99.93     |           | 580.2525 | 580.2533  | 603.2435 | 1.38       | 1.38           | 99.94      | 98.79       | 99.93         | 15  |
| +        | C25 H36 N6 O10      | C25 H36 Na O10        | 99.46     |           | 580.2525 | 580.2493  | 603.2385 | -5.55      | 5.55           | 99         | 99.85       | 99.92         | 11  |
| +        | C18 H40 N6 O15      | C18 H40 Na O15        | 98.28     |           | 580.2525 | 580.2502  | 603.2444 | 4.56       | 4.56           | 99.32      | 96.1        | 99.91         | 2   |
| +        | C42 H32 N2 O        | C42 H32 Na O          | 96.2      |           | 580.2525 | 580.2515  | 603.2407 | -1.79      | 1.79           | 99.9       | 86.94       | 99.91         | 28  |
| +        | C41 H37 Cl O        | C41 H37 Cl Na O       | 85.79     |           | 580.2525 | 580.2533  | 603.2425 | 1.36       | 1.36           | 99.94      | 50.87       | 99.39         | 23  |
| +        | C38 H37 Cl N2 O3    | C38 H37 Cl N2 Na O3   | 85.39     |           | 580.2525 | 580.2493  | 603.2385 | -5.58      | 5.58           | 98.99      | 51.12       | 99.31         | 19  |
| +        | C28 H41 Cl N2 O8    | C28 H41 Cl N2 Na O8   | 84.87     |           | 580.2525 | 580.2551  | 603.2444 | 4.55       | 4.55           | 99.33      | 48.8        | 99.22         | 10  |
| +        | C24 H41 Cl N4 O10   | C24 H41 Cl N4 Na O10  | 84.3      |           | 580.2525 | 580.2511  | 603.2403 | -2.4       | 2.4            | 99.81      | 46.08       | 99.13         | 6   |
| +        | C23 H45 Cl O14      | C23 H45 Cl Na O14     | 83.24     |           | 580.2525 | 580.2498  | 603.239  | -4.68      | 4.68           | 99.29      | 43.19       | 99.18         | 1   |
| +        | C38 H42 Cl2 O3      | C38 H42 Cl2 Na O3     | 76.35     |           | 580.2525 | 580.2511  | 603.2403 | -2.42      | 2.42           | 99.81      | 18.28       | 99.1          | 14  |
| +        | C24 H42 Cl2 N6 O6   | C24 H42 Cl2 N6 Na O6  | 75.3      |           | 580.2525 | 580.2543  | 603.2435 | 3.05       | 3.05           | 99.7       | 14.93       | 98.93         | 6   |
| +        | C23 H46 Cl2 N2 O10  | C23 H46 Cl2 N2 Na O10 | 75.06     |           | 580.2525 | 580.253   | 603.2422 | 0.77       | 0.77           | 99.98      | 13.59       | 98.98         | 1   |

Figure S81. (+)-HRESIMS data of **9**

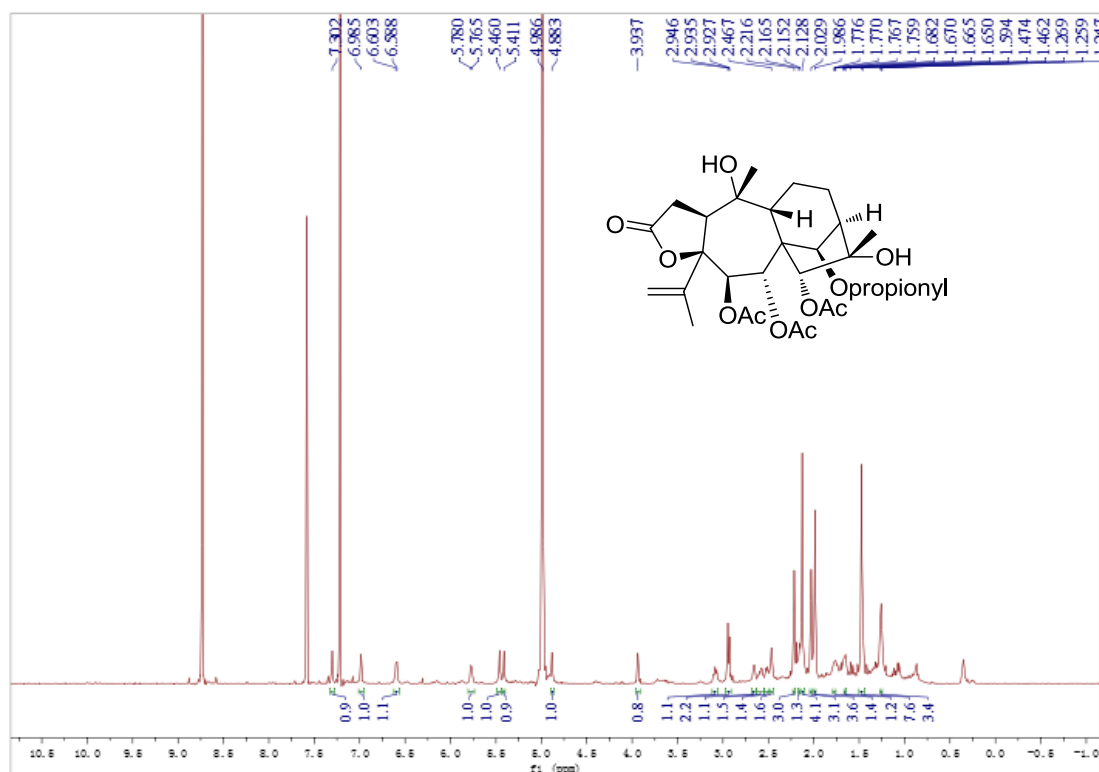

Figure S82. <sup>1</sup>H NMR spectrum of **9** (600 MHz, in C<sub>5</sub>D<sub>5</sub>N)

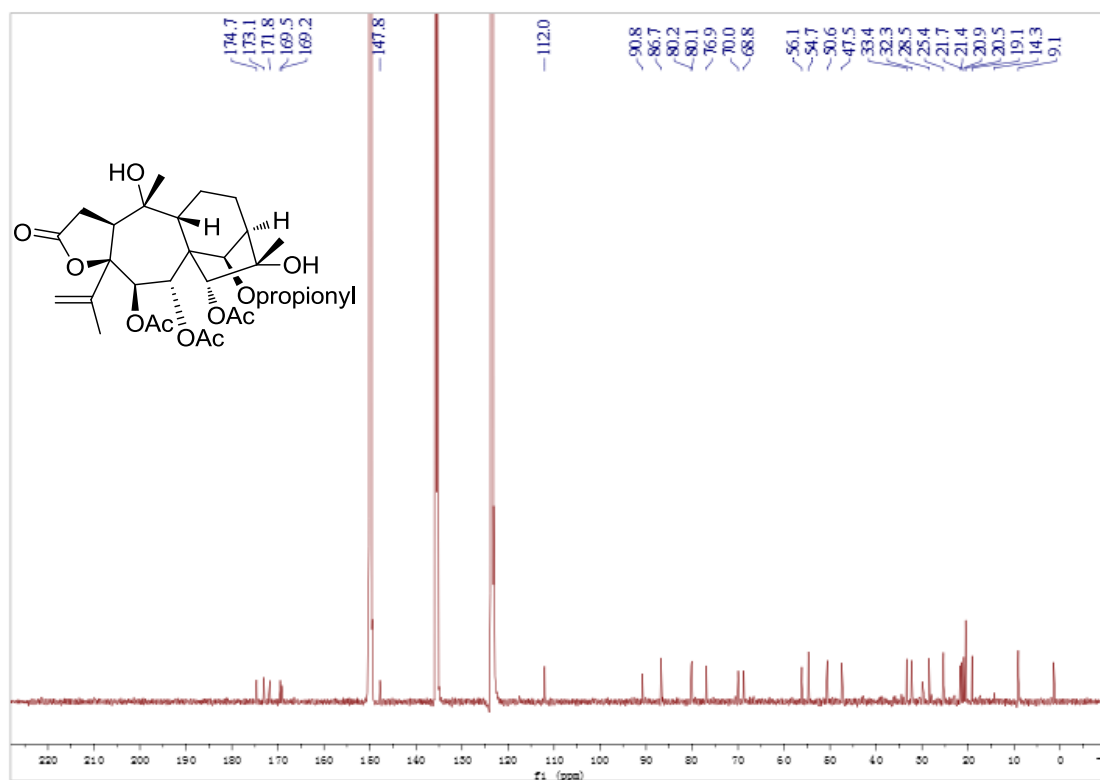

**Figure S83.**  $^{13}\text{C}$  NMR spectrum of **9** (150 MHz, in  $\text{C}_5\text{D}_5\text{N}$ )

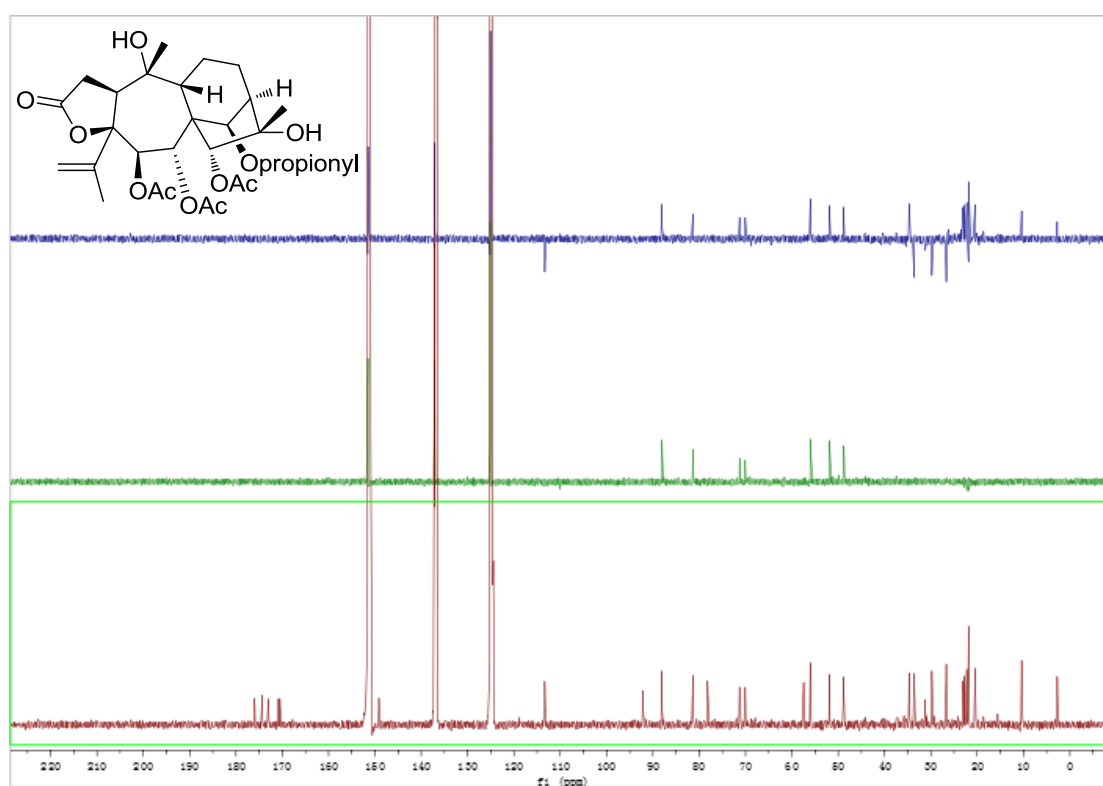

**Figure S84.** DEPT spectrum of **9** (150 MHz, in  $\text{C}_5\text{D}_5\text{N}$ )

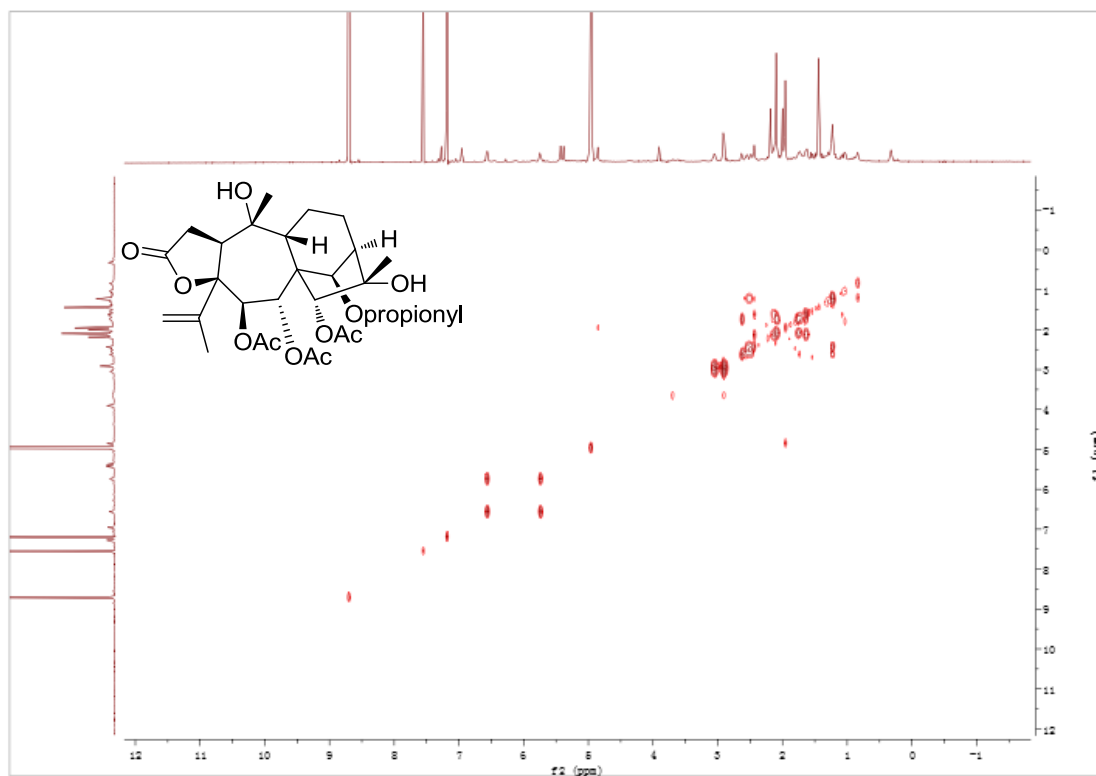

**Figure S85.**  $^1\text{H}$ - $^1\text{H}$  COSY spectrum of **9** (600 MHz, in  $\text{C}_5\text{D}_5\text{N}$ )

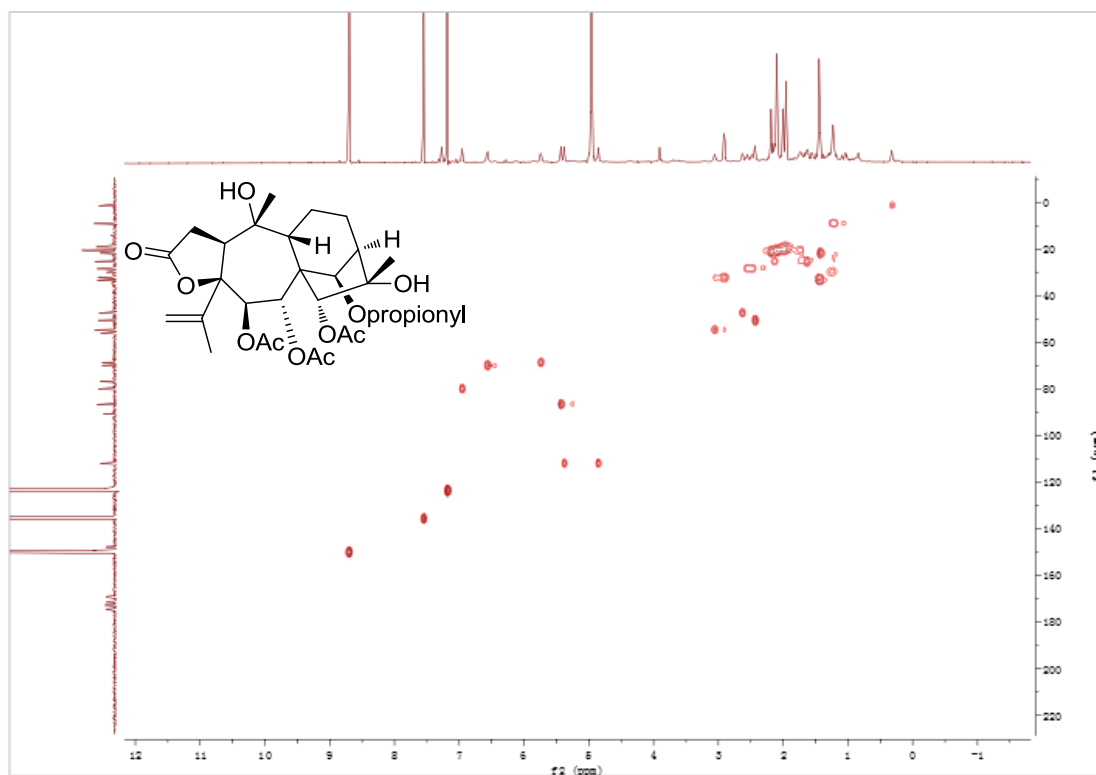

**Figure S86.** HSQC spectrum of **9** (600 MHz, in  $\text{C}_5\text{D}_5\text{N}$ )

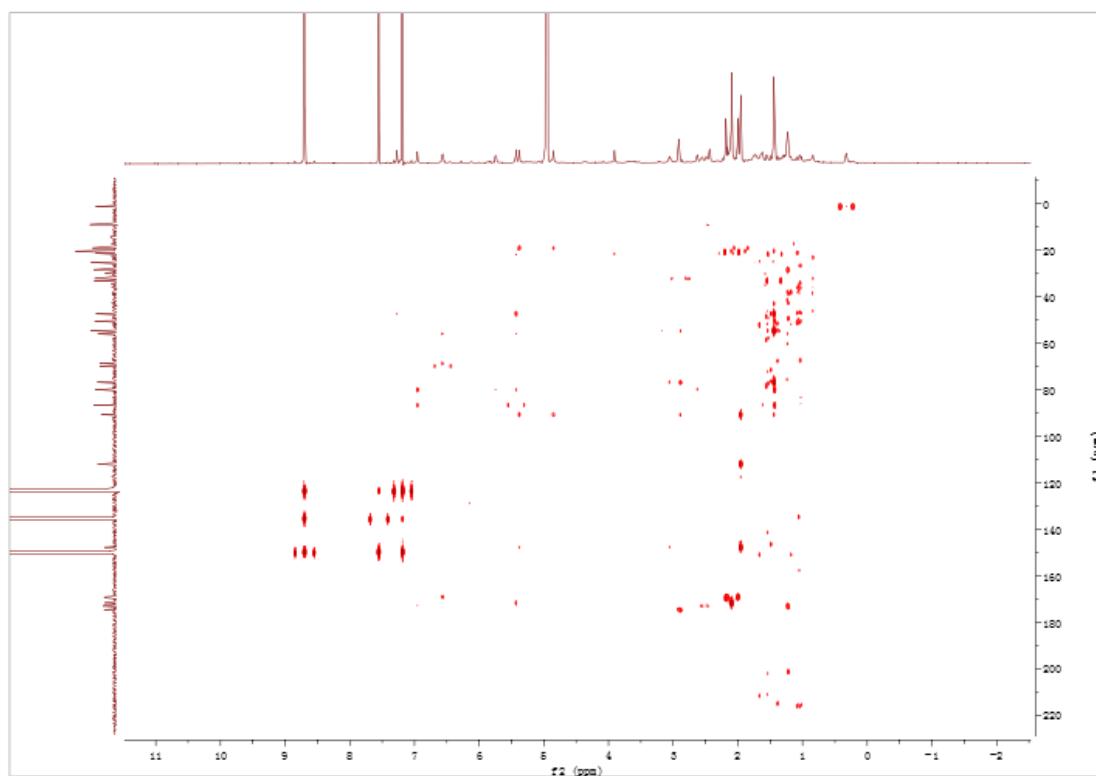

**Figure S87.** HMBC spectrum of **9** (600 MHz, in  $C_5D_5N$ )

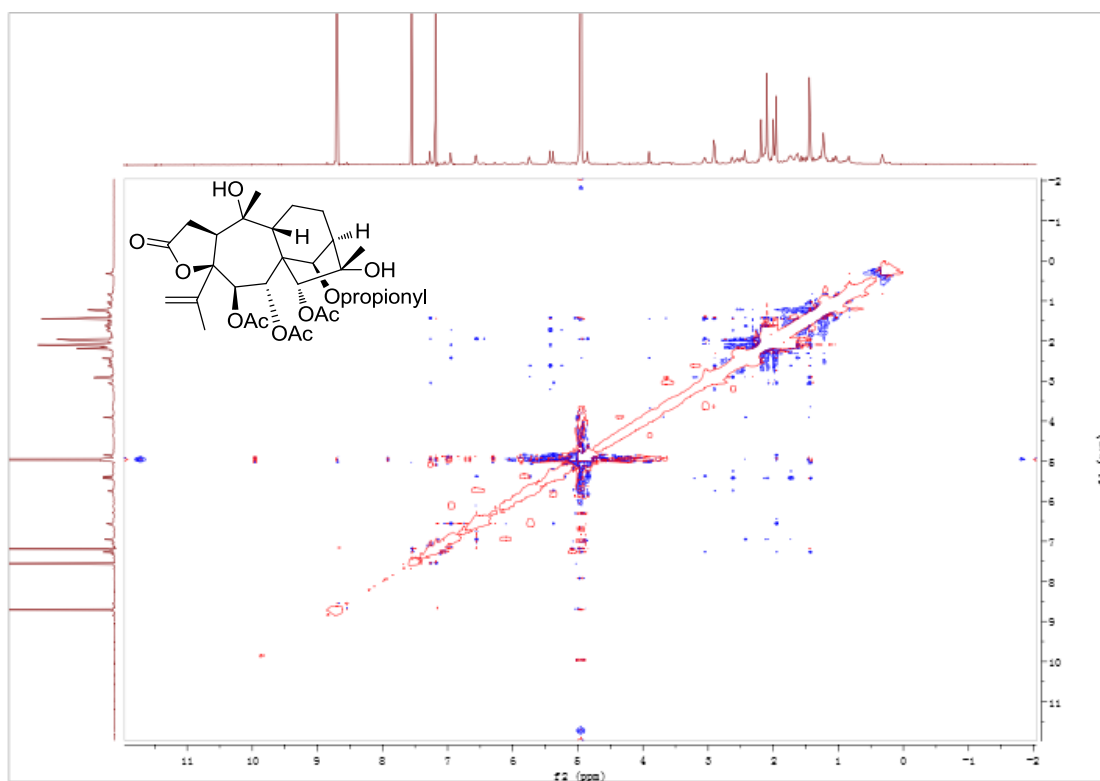

**Figure S88.** NOESY spectrum of **9** (600 MHz, in  $C_5D_5N$ )

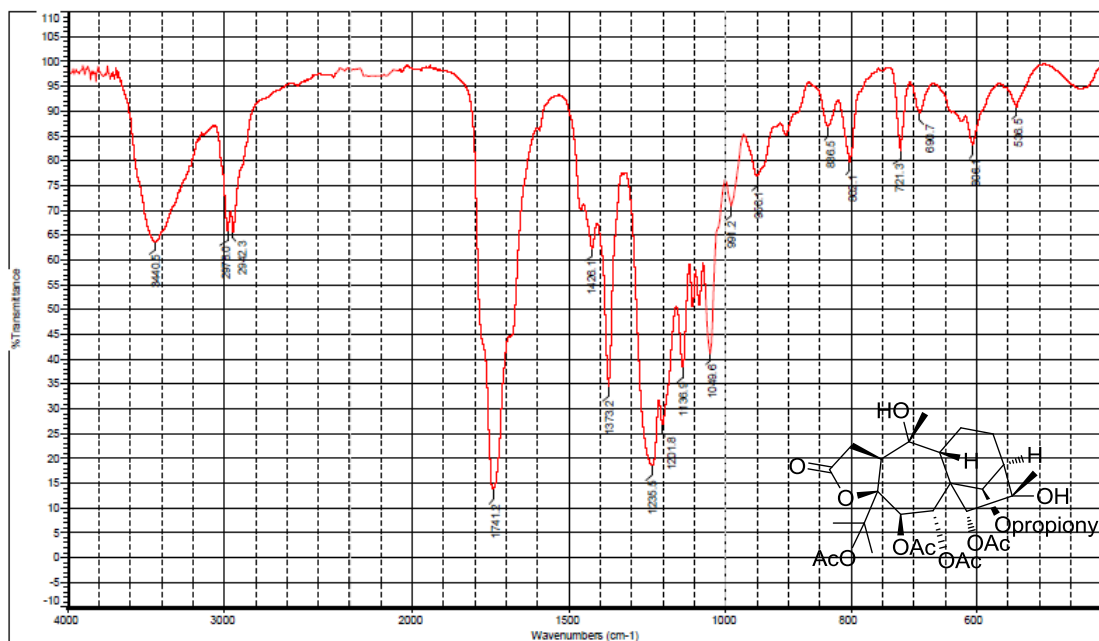

Figure S89. IR spectrum of **10**

MS Formula Results: + Scan (6.026 min) Sub (2015052002.d)

| Peak | m/z      | Ion                 | Formula     | Abundance |
|------|----------|---------------------|-------------|-----------|
|      | 663.2618 | (M+Na) <sup>+</sup> | C31H44NaO14 | 141701.8  |
| 1    | 663.2618 | ✓                   | C31H44NaO14 | 99.92     |
| 2    | 663.2618 | ✓                   | C32H40NaO10 | 99.81     |
| 3    | 663.2618 | ✓                   | C27H40NaO12 | 99.58     |
| 4    | 663.2618 | ✓                   | C28H44NaO16 | 98.87     |
| 5    | 663.2618 | ✓                   | C44H36NaO9  | 97.39     |
| 6    | 663.2618 | ✓                   | C20H44NaO17 | 97.18     |

  

| Peak | Formula (M) | Ion Formula | Score | Cross Sec | Mass     | Calc. Mass | Calc. m/z | Diff (ppm) | Abn Diff (ppm) | Mass Match | Abund Match | Spacing Match | DDC |
|------|-------------|-------------|-------|-----------|----------|------------|-----------|------------|----------------|------------|-------------|---------------|-----|
| 1    | C31H44NaO14 | C31H44NaO14 | 99.92 |           | 640.2726 | 640.2731   | 663.2623  | 0.84       | 0.84           | 99.98      | 99.86       | 99.86         | 10  |
| 2    | C32H40NaO10 | C32H40NaO10 | 99.81 |           | 640.2726 | 640.2744   | 663.2637  | 2.91       | 2.91           | 99.72      | 99.89       | 99.9          | 15  |
| 3    | C27H40NaO12 | C27H40NaO12 | 99.58 |           | 640.2726 | 640.2704   | 663.2596  | -3.39      | 3.39           | 99.62      | 99.22       | 99.34         | 11  |
| 4    | C28H44NaO16 | C28H44NaO16 | 98.87 |           | 640.2726 | 640.3591   | 663.3583  | -5.46      | 5.46           | 99.62      | 97.76       | 99.91         | 6   |
| 5    | C44H36NaO9  | C44H36NaO9  | 97.39 |           | 640.2726 | 640.2726   | 662.2618  | 0.03       | 0.03           | 100        | 92.36       | 99.83         | 26  |
| 6    | C20H44NaO17 | C20H44NaO17 | 97.18 |           | 640.2726 | 640.2763   | 663.2855  | 5.78       | 5.78           | 98.9       | 92          | 99.97         | 3   |

Figure S90. (+)-HRESIMS data of **10**

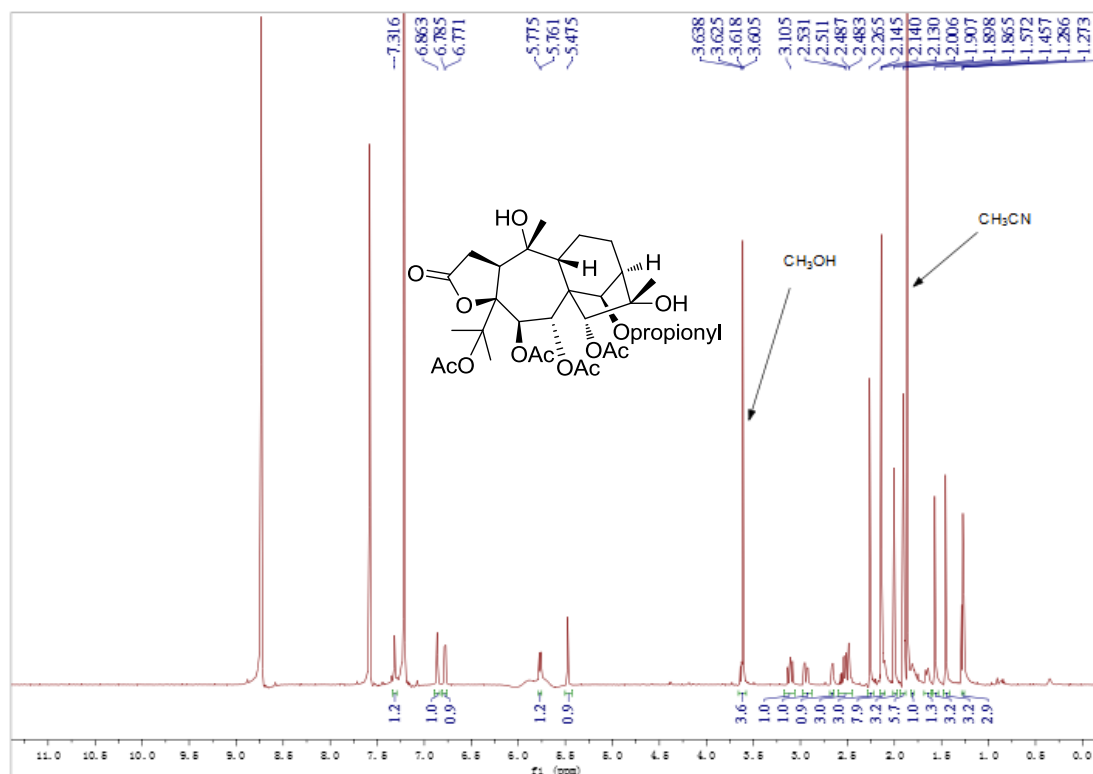

Figure S91. <sup>1</sup>H NMR spectrum of **10** (600 MHz, in C<sub>5</sub>D<sub>5</sub>N)



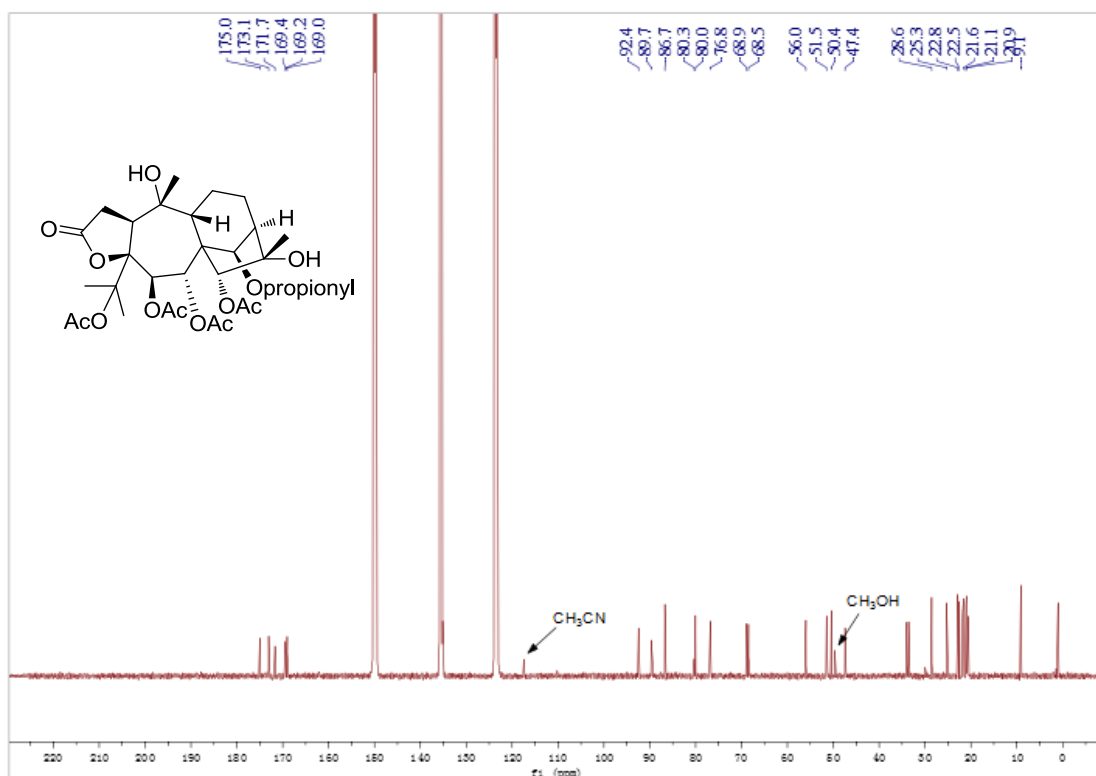

**Figure S92**  $^{13}\text{C}$  NMR spectrum of **10** (150 MHz, in  $\text{C}_5\text{D}_5\text{N}$ )

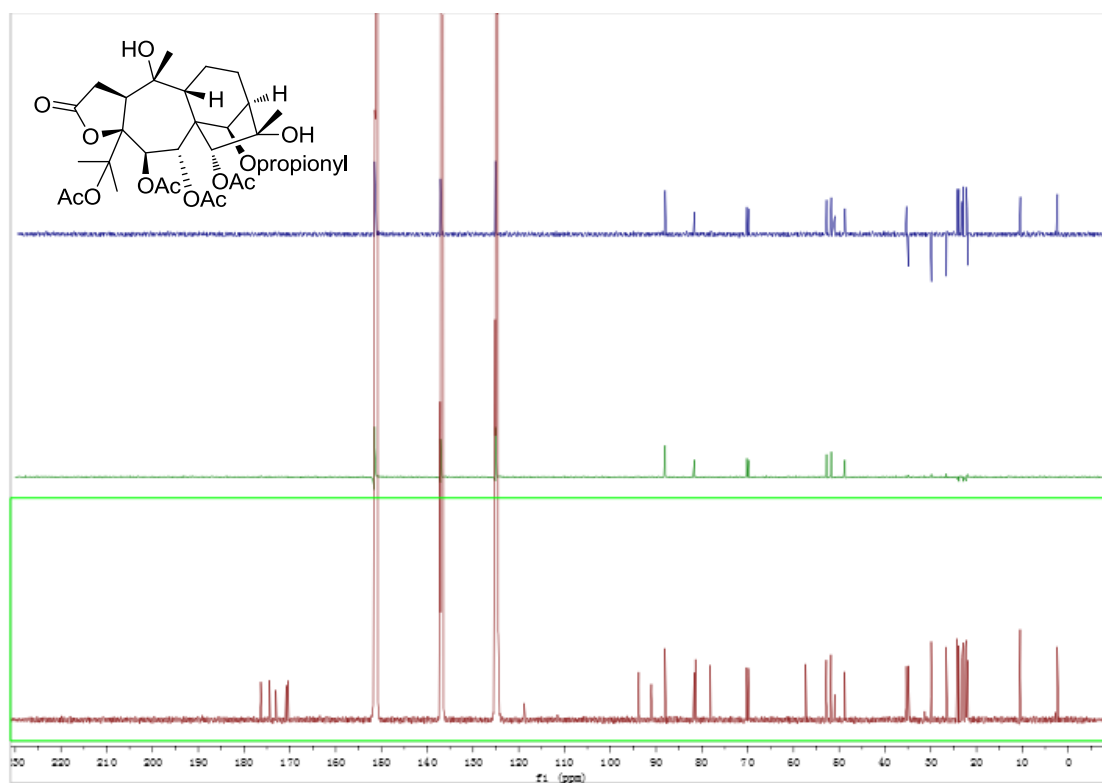

**Figure S93.** DEPT spectrum of **10** (150 MHz, in  $\text{C}_5\text{D}_5\text{N}$ )

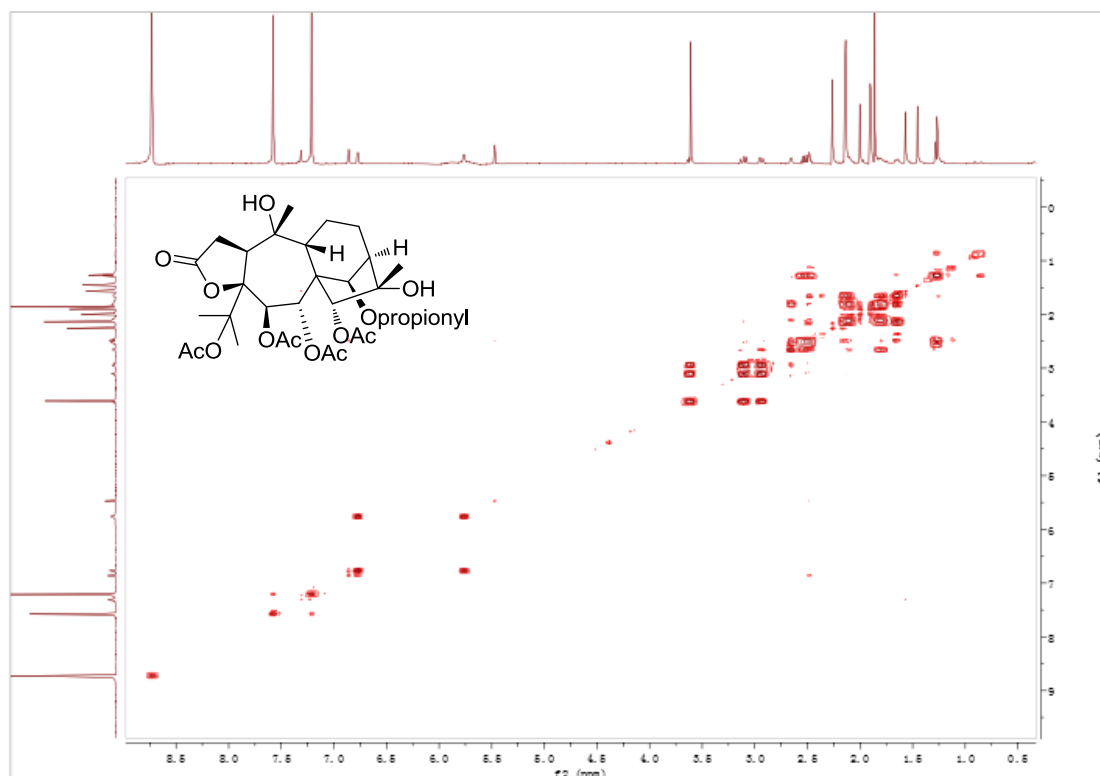

**Figure S94.**  $^1\text{H}$ - $^1\text{H}$  COSY spectrum of **10** (600 MHz, in  $\text{C}_5\text{D}_5\text{N}$ )

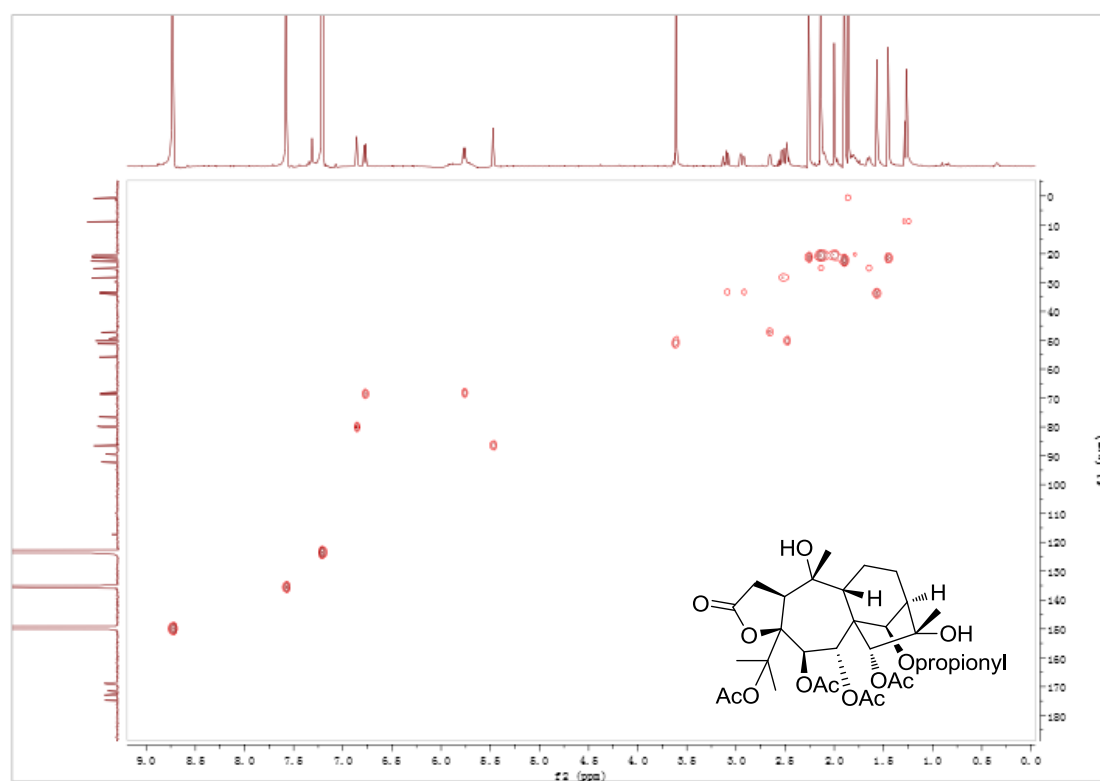

**Figure S95.** HSQC spectrum of **10** (600 MHz, in  $\text{C}_5\text{D}_5\text{N}$ )

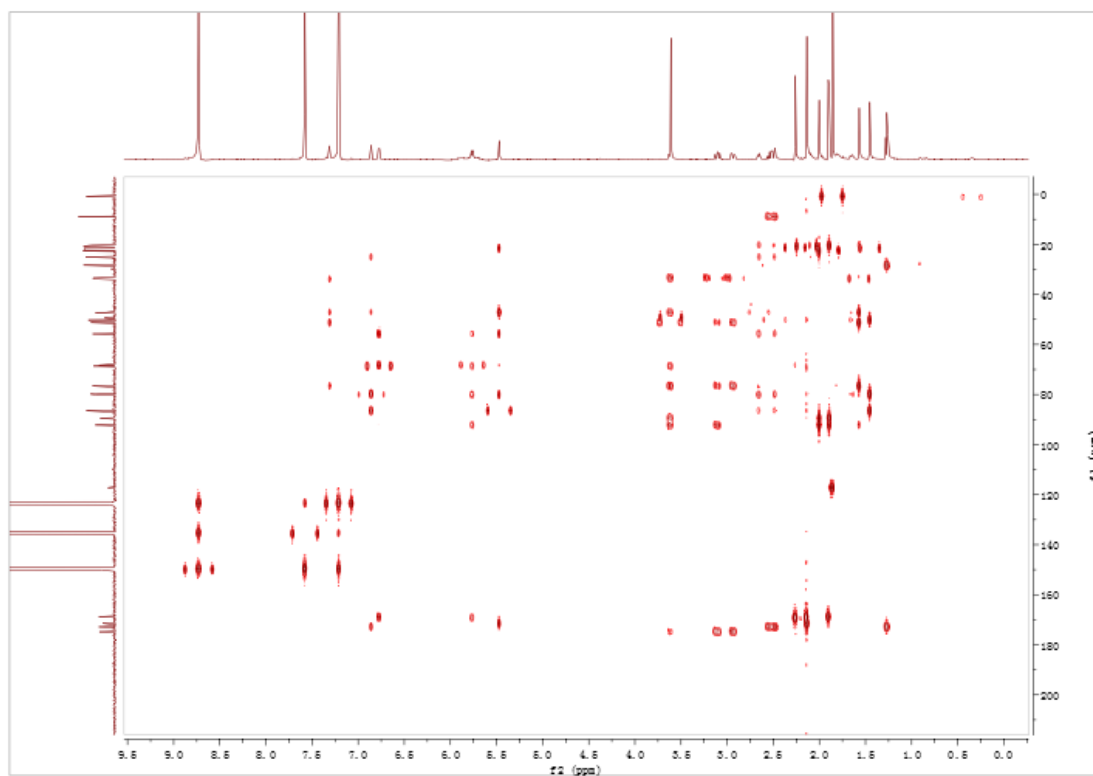

**Figure S96.** HMBC spectrum of **10** (600 MHz, in C<sub>5</sub>D<sub>5</sub>N)

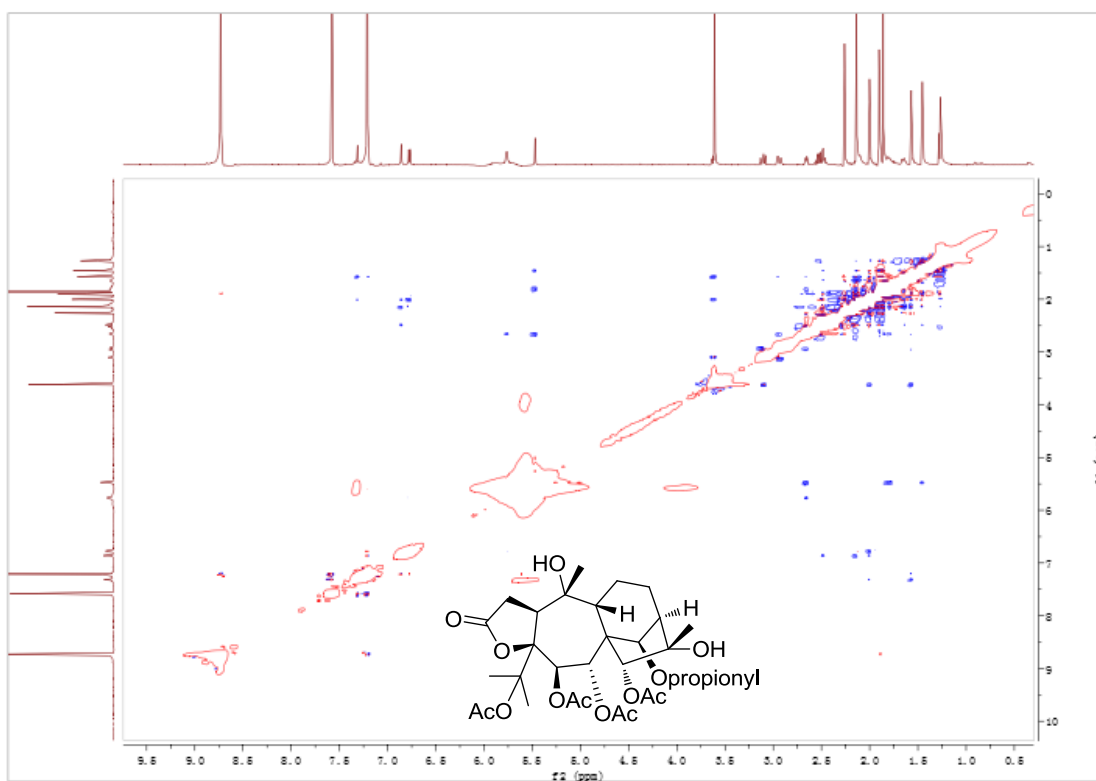

**Figure S97.** NOESY spectrum of **10** (600 MHz, in C<sub>5</sub>D<sub>5</sub>N)

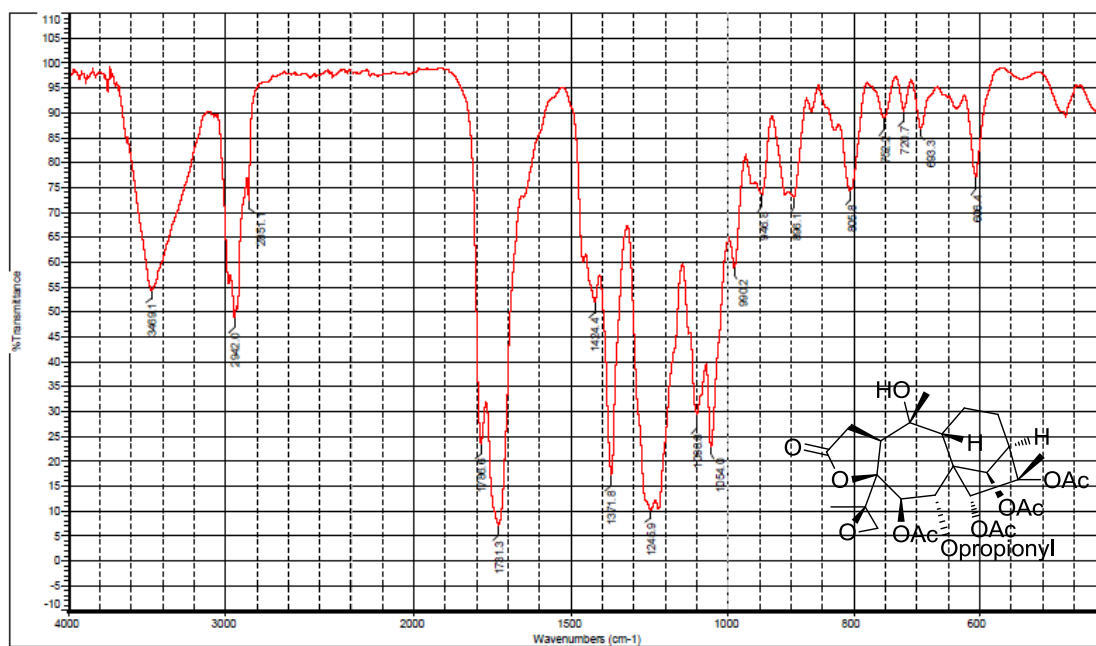

Figure S98. IR spectrum of **11**

MS Formula Results: + Scan (6.407 min) Sub (2015061101.d)

| m/z      | Ion                 | Formula        | Abundance |
|----------|---------------------|----------------|-----------|
| 661.2469 | (M+Na) <sup>+</sup> | C31 H42 Na O14 | 84935.9   |

  

| Best | Formula (M)    | Ion Formula       | Score | Cross Sco | Mass     | Calc Mass | Calc m/z | Diff (ppm) | Abs Diff (ppm) | Mass Match | Abund Match | Spacing Match | DBE |
|------|----------------|-------------------|-------|-----------|----------|-----------|----------|------------|----------------|------------|-------------|---------------|-----|
| ✓    | C31 H42 O14    | C31 H42 Na O14    | 99.91 |           | 638.2576 | 638.2576  | 661.2467 | -0.27      | 0.27           | 100        | 99.71       | 99.97         | 11  |
|      | C39 H38 Na O15 | C39 H38 Na O15    | 99.8  |           | 638.2576 | 638.2588  | 661.2448 | 1.81       | 1.81           | 99.89      | 99.85       | 99.99         | 16  |
|      | C27 H38 N6 O12 | C27 H38 N6 Na O12 | 99.32 |           | 638.2576 | 638.2548  | 661.2444 | -4.51      | 4.51           | 99.33      | 98.75       | 99.99         | 12  |
|      | C44 H34 N2 O3  | C44 H34 N2 Na O3  | 98.07 |           | 638.2576 | 638.2569  | 661.2462 | -1.08      | 1.08           | 99.96      | 93.32       | 99.97         | 29  |
|      | C20 H42 N6 O17 | C20 H42 N6 Na O17 | 97.08 |           | 638.2577 | 638.2606  | 661.2499 | 4.68       | 4.68           | 99.28      | 91.02       | 99.98         | 3   |
|      | C49 H34 O      | C49 H34 Na O      | 96.98 |           | 638.2576 | 638.261   | 661.2502 | 5.23       | 5.23           | 99.1       | 88.81       | 99.95         | 33  |

Figure S99. (+)-HRESIMS data of **11**

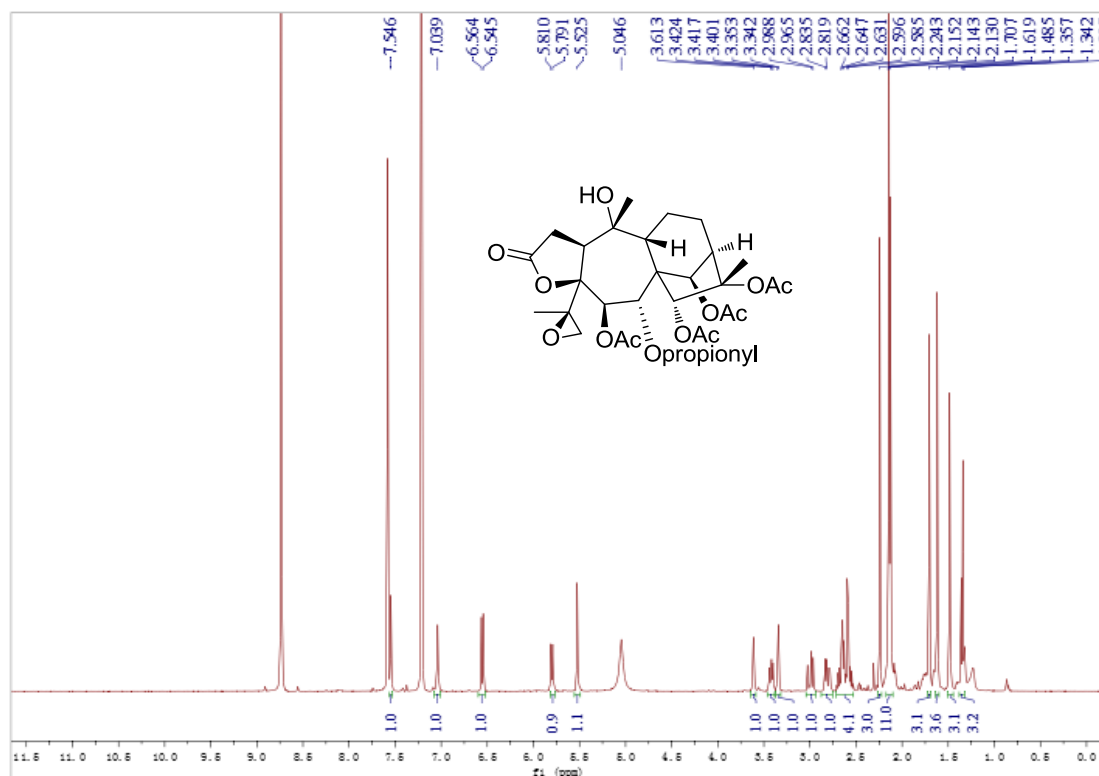

Figure S100. <sup>1</sup>H NMR spectrum of **11** (500 MHz, in C<sub>5</sub>D<sub>5</sub>N)

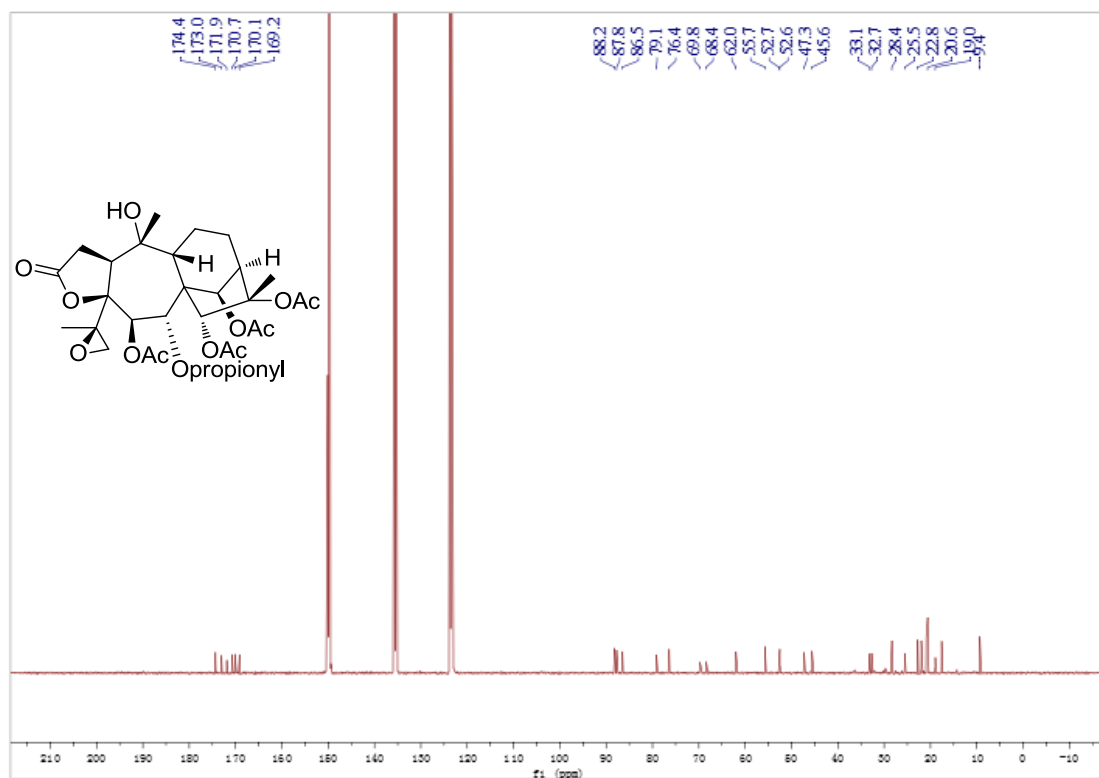

**Figure S101.**  $^{13}\text{C}$  NMR spectrum of **11** (125 MHz, in  $\text{C}_5\text{D}_5\text{N}$ )

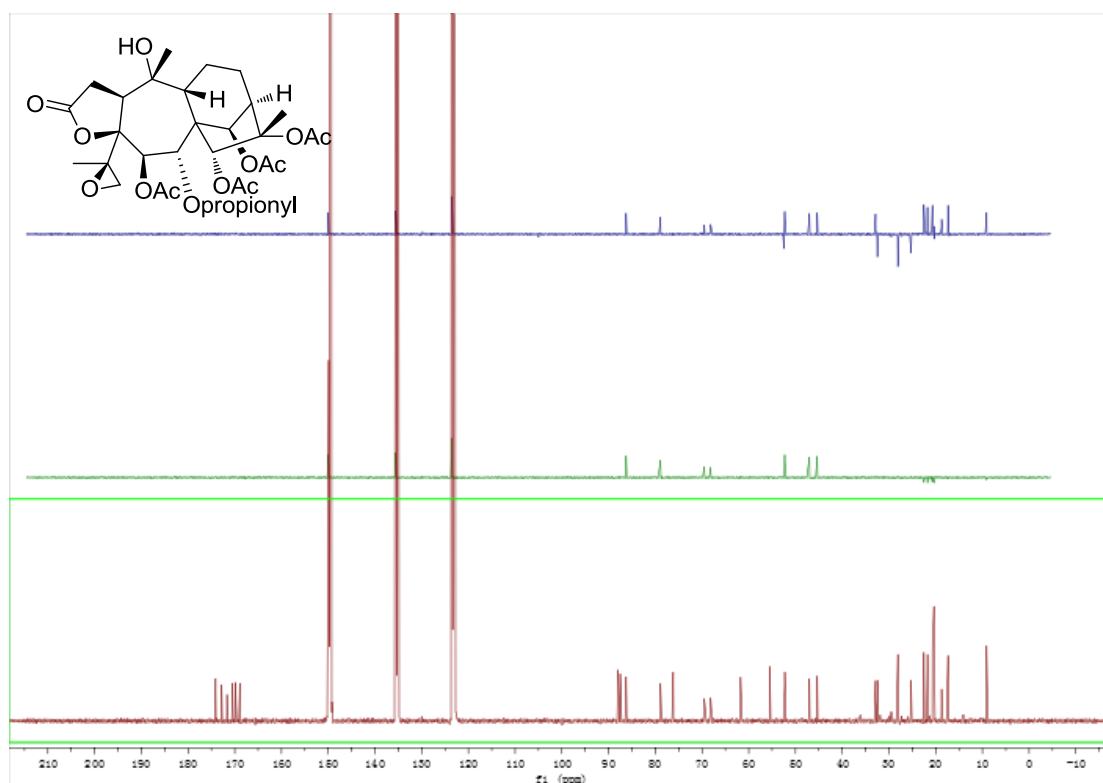

**Figure S102.** DEPT spectrum of **11** (125 MHz, in  $\text{C}_5\text{D}_5\text{N}$ )

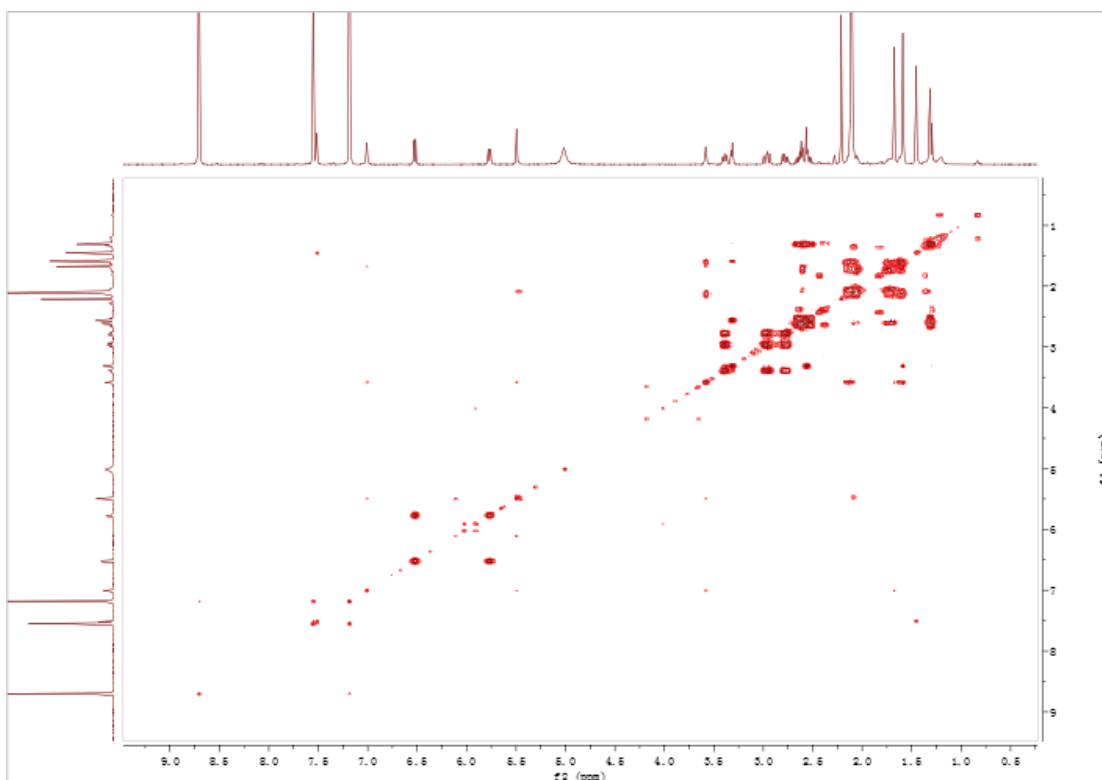

**Figure S103.**  $^1\text{H}$ - $^1\text{H}$  COSY spectrum of **11** (500 MHz, in  $\text{C}_5\text{D}_5\text{N}$ )

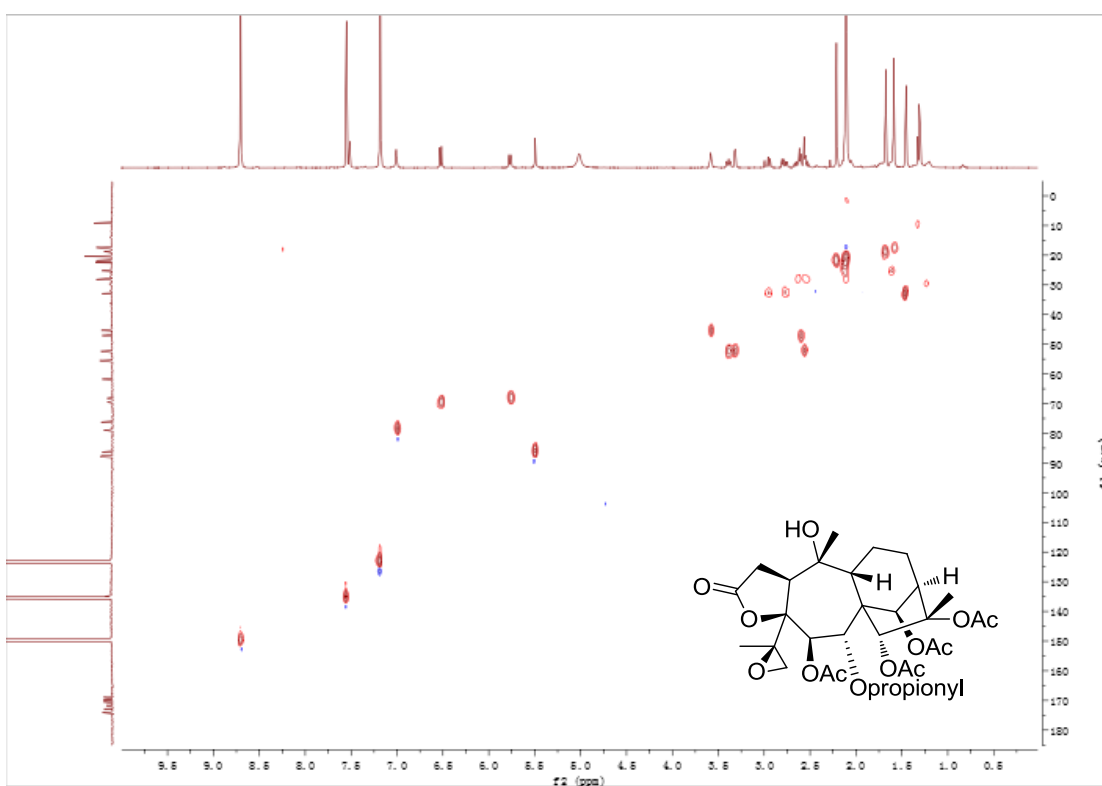

**Figure S104.** HSQC spectrum of **11**(500 MHz, in  $\text{C}_5\text{D}_5\text{N}$ )

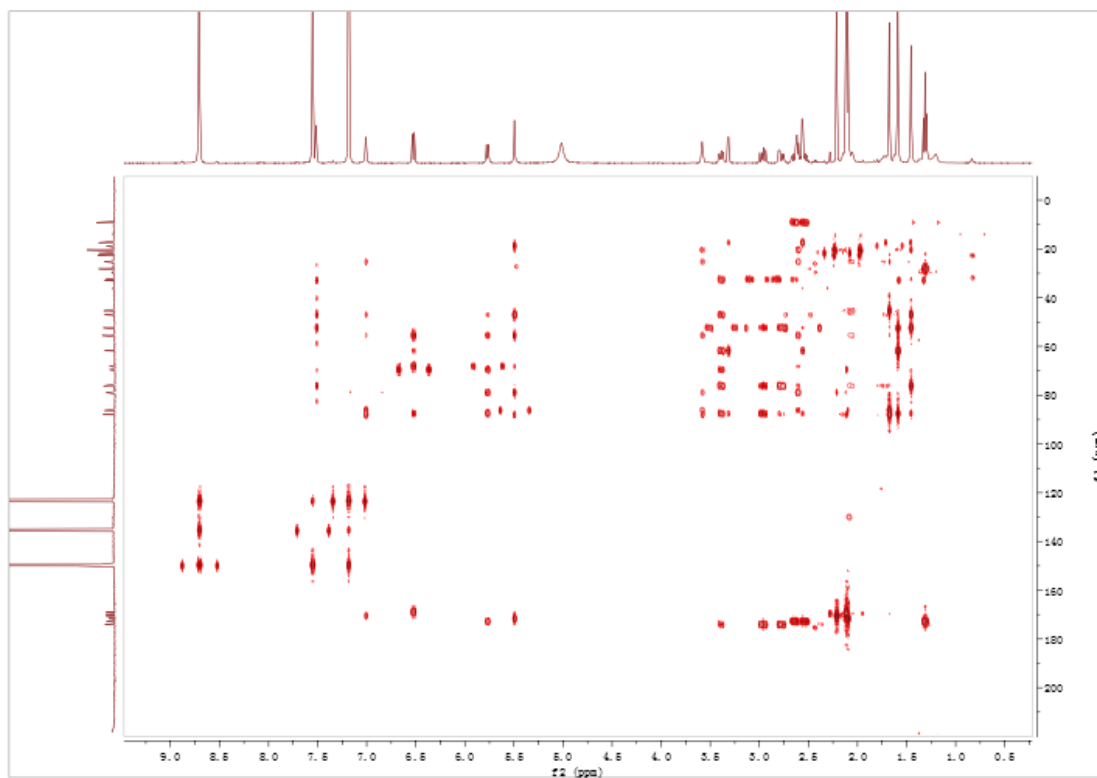

**Figure S105.** HMBC spectrum of **11** (500 MHz, in C<sub>5</sub>D<sub>5</sub>N)

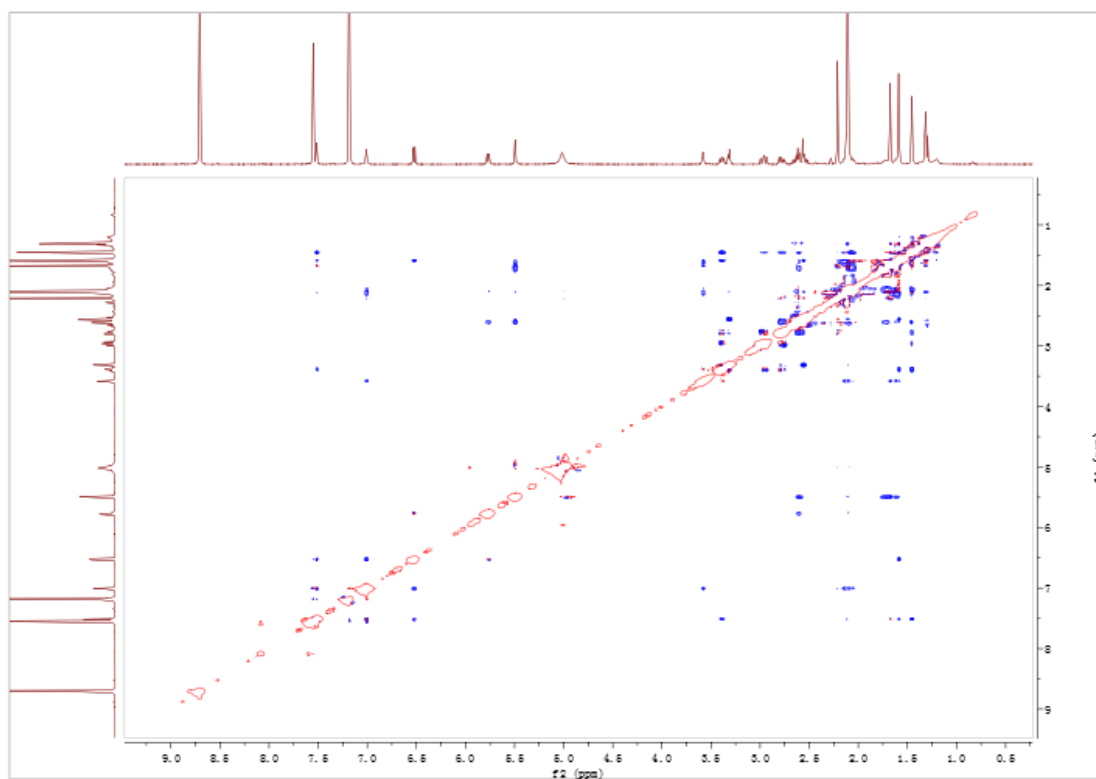

**Figure S106.** NOESY spectrum of **11** (500 MHz, in C<sub>5</sub>D<sub>5</sub>N)

**Table S3.** Crystal data and structure refinement for **11**

|                                                                         |                                                   |
|-------------------------------------------------------------------------|---------------------------------------------------|
| Identification code                                                     | exp_3589                                          |
| Empirical formula                                                       | C <sub>32</sub> H <sub>48</sub> O <sub>16</sub>   |
| Formula weight                                                          | 688.70                                            |
| Temperature/K                                                           | 102.8                                             |
| Crystal system                                                          | monoclinic                                        |
| Space group                                                             | P2 <sub>1</sub>                                   |
| a / Å, b / Å, c / Å                                                     | 12.8374(3), 10.8913(3), 24.3599(6)                |
| α/°, β/°, γ/°                                                           | 90.00, 99.441(2), 90.00                           |
| Volume/Å <sup>3</sup>                                                   | 3359.79(14)                                       |
| Z                                                                       | 4                                                 |
| ρ <sub>calc</sub> /mg mm <sup>-3</sup>                                  | 1.362                                             |
| μ/mm <sup>-1</sup>                                                      | 0.925                                             |
| F(000)                                                                  | 1472                                              |
| Crystal size/mm <sup>3</sup>                                            | 0.17 × 0.15 × 0.05                                |
| 2θ range for data collection                                            | 7.34 to 142.17°                                   |
| Index ranges                                                            | -15 ≤ h ≤ 15, -12 ≤ k ≤ 13, -29 ≤ l ≤ 29          |
| Reflections collected                                                   | 28272                                             |
| Independent reflections                                                 | 11987[R(int) = 0.0299 (inf-0.9Å)]                 |
| Data/restraints/parameters                                              | 11987/1/883                                       |
| Goodness-of-fit on F <sup>2</sup>                                       | 1.038                                             |
| Final R indexes [I > 2σ (I) i.e. F <sub>o</sub> > 4σ (F <sub>o</sub> )] | R <sub>1</sub> = 0.0592, wR <sub>2</sub> = 0.1599 |
| Final R indexes [all data]                                              | R <sub>1</sub> = 0.0635 wR <sub>2</sub> = 0.1658  |
| Largest diff. peak/hole/e Å <sup>-3</sup>                               | 0.168/-0.616                                      |
| Flack Parameters                                                        | -0.07(15)                                         |
| Completeness                                                            | 0.990                                             |

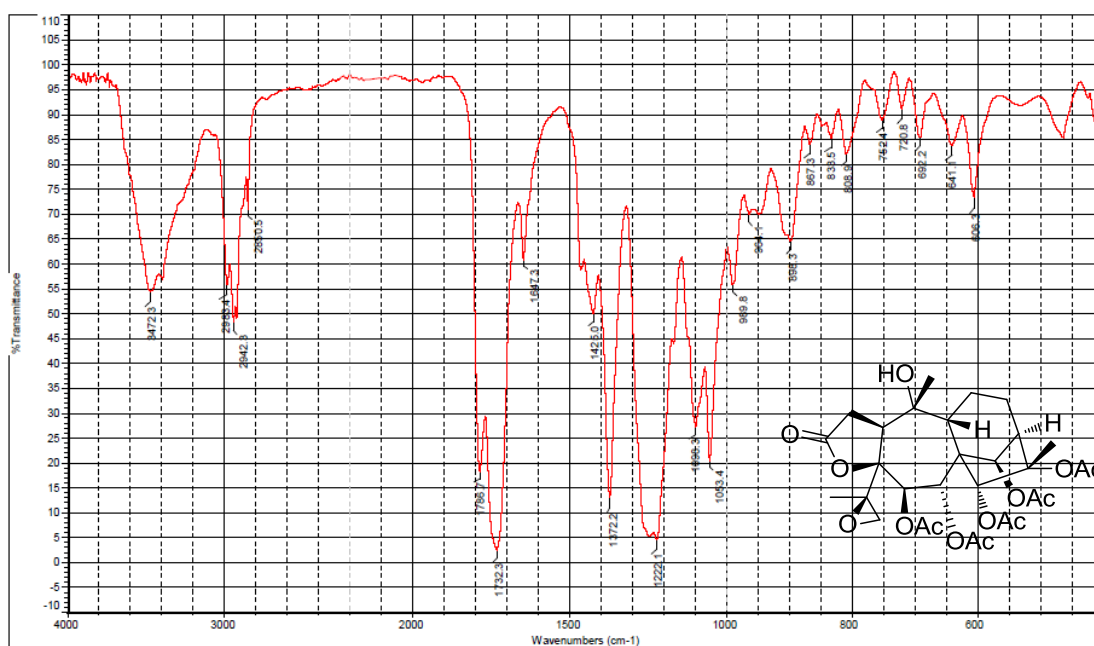**Figure S107.** IR spectrum of **12**



MS Formula Results: + Scan (5.921 min) Sub (2015051802.d)

| m/z      | Ion                 | Formula           | Abundance |           |          |            |           |            |                |            |             |               |     |
|----------|---------------------|-------------------|-----------|-----------|----------|------------|-----------|------------|----------------|------------|-------------|---------------|-----|
| 847.2307 | (M+Na) <sup>+</sup> | C30 H40 Na O14    | 178238.7  |           |          |            |           |            |                |            |             |               |     |
| Best     | Formula (M)         | Ion Formula       | Score     | Cross Sco | Mass     | Calc. Mass | Calc. m/z | Diff (ppm) | Abs Diff (ppm) | Mass Match | Abund Match | Spacing Match | DBE |
| +        | C30 H40 Na O14      | C30 H40 Na O14    | 99.95     |           | 824.2415 | 824.2418   | 847.231   | 0.55       | 0.55           | 99.99      | 99.95       | 99.87         | 11  |
| +        | C28 H36 Na O12      | C28 H36 Na O12    | 99.69     |           | 824.2415 | 824.2381   | 847.2283  | -3.77      | 3.77           | 99.53      | 99.76       | 99.82         | 12  |
| +        | C31 H36 Na O10      | C31 H36 Na O10    | 99.67     |           | 824.2415 | 824.3431   | 847.2324  | 2.68       | 2.68           | 99.76      | 99.31       | 99.91         | 16  |
| +        | C25 H40 N2 O16      | C25 H40 N2 Na O16 | 98.13     |           | 824.2415 | 824.2378   | 847.227   | -5.9       | 5.9            | 98.88      | 98.87       | 98.88         | 7   |
| +        | C19 H40 N6 O17      | C19 H40 N6 Na O17 | 97.83     |           | 824.2415 | 824.245    | 847.2342  | 5.63       | 5.63           | 98.96      | 94.24       | 99.9          | 3   |
| +        | C43 H32 N2 O3       | C43 H32 N2 Na O3  | 96.88     |           | 824.2415 | 824.2413   | 847.2305  | -0.28      | 0.28           | 100        | 89.21       | 99.9          | 29  |

Figure S108. (+)-HRESIMS data of **12**

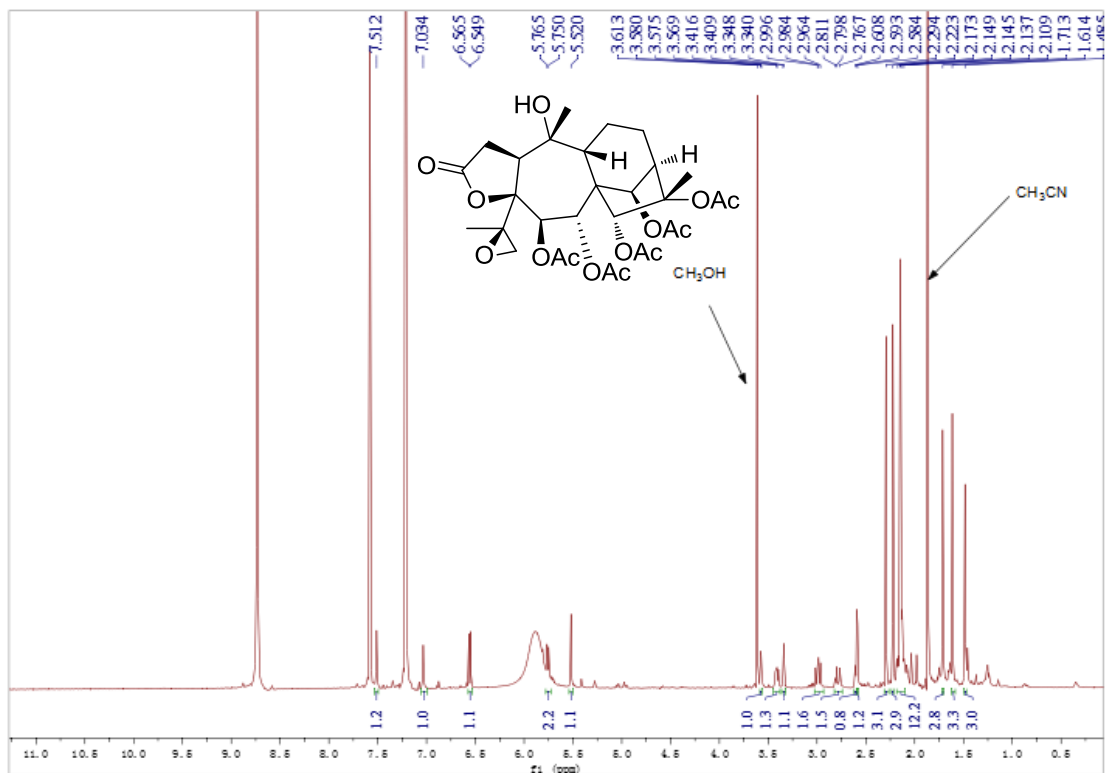

Figure S109. <sup>1</sup>H NMR spectrum of **12** (600 MHz, in C<sub>5</sub>D<sub>5</sub>N)

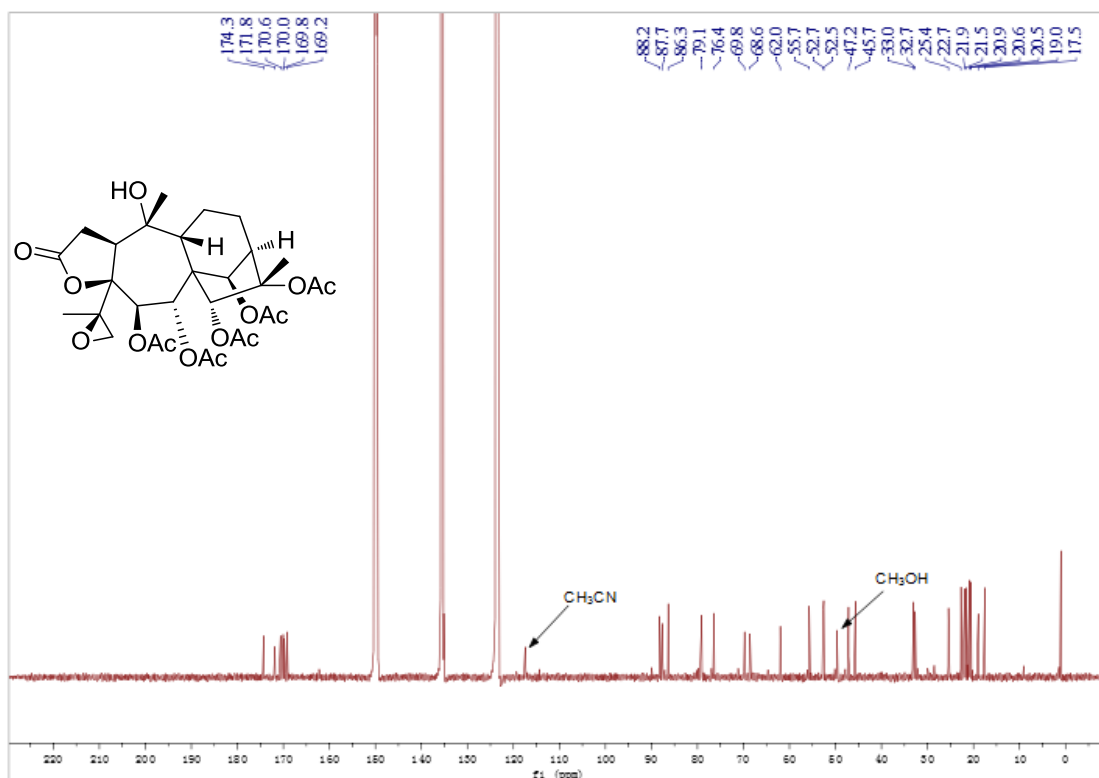

**Figure S110.**  $^{13}\text{C}$  NMR spectrum of **12** (150 MHz, in  $\text{C}_5\text{D}_5\text{N}$ )

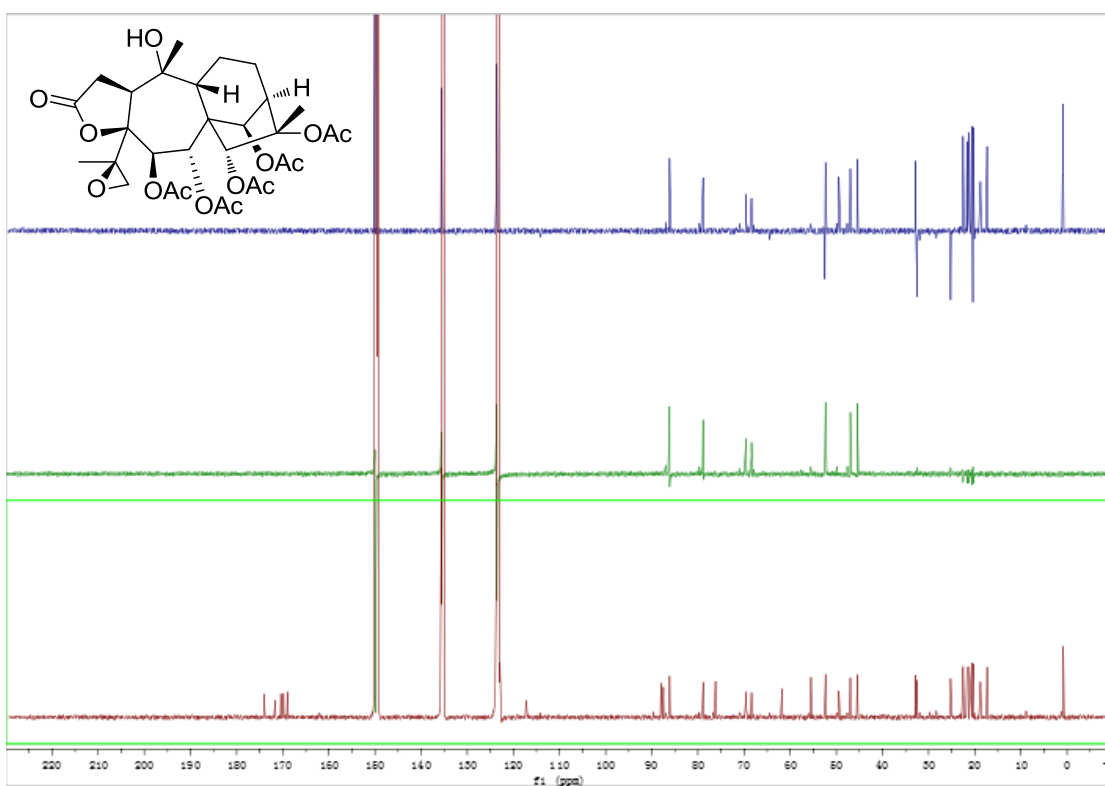

**Figure S111.** DEPT spectrum of **12** (150 MHz, in  $\text{C}_5\text{D}_5\text{N}$ )

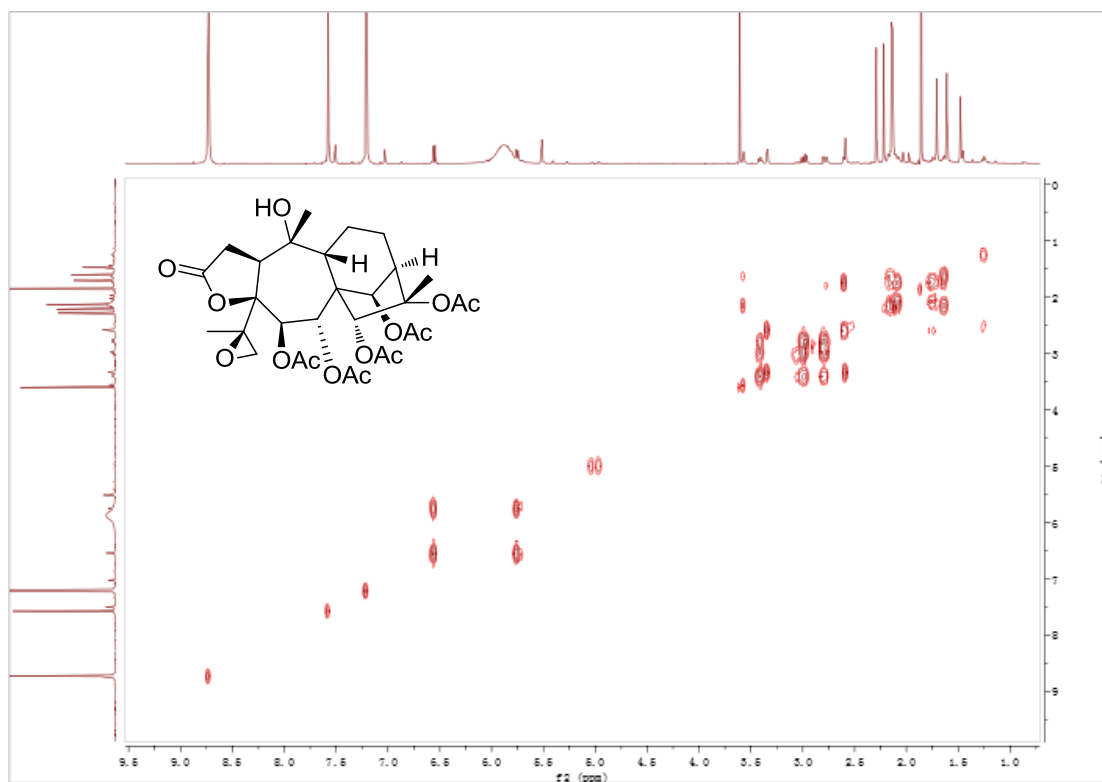

**Figure S112.**  $^1\text{H}$ - $^1\text{H}$  COSY spectrum of **12** (600 MHz, in  $\text{C}_5\text{D}_5\text{N}$ )

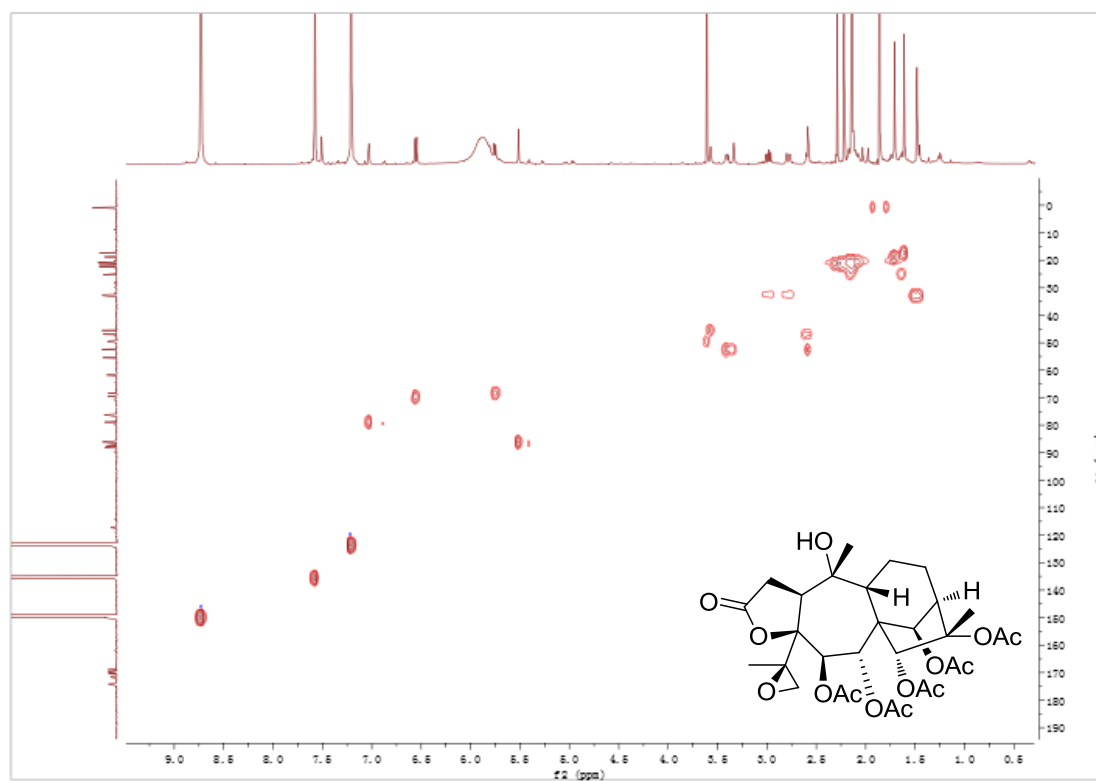

**Figure S113.** HSQC spectrum of **12** (600 MHz, in  $\text{C}_5\text{D}_5\text{N}$ )

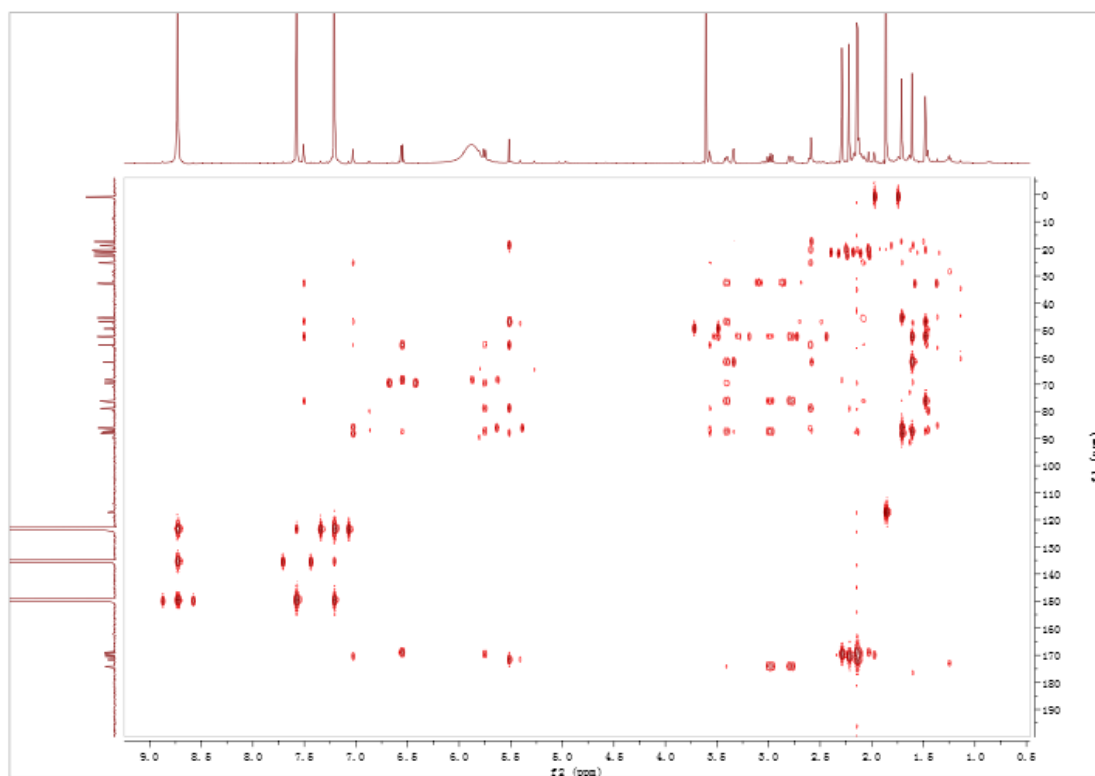

**Figure S114.** HMBC spectrum of **12** (600 MHz, in  $C_5D_5N$ )

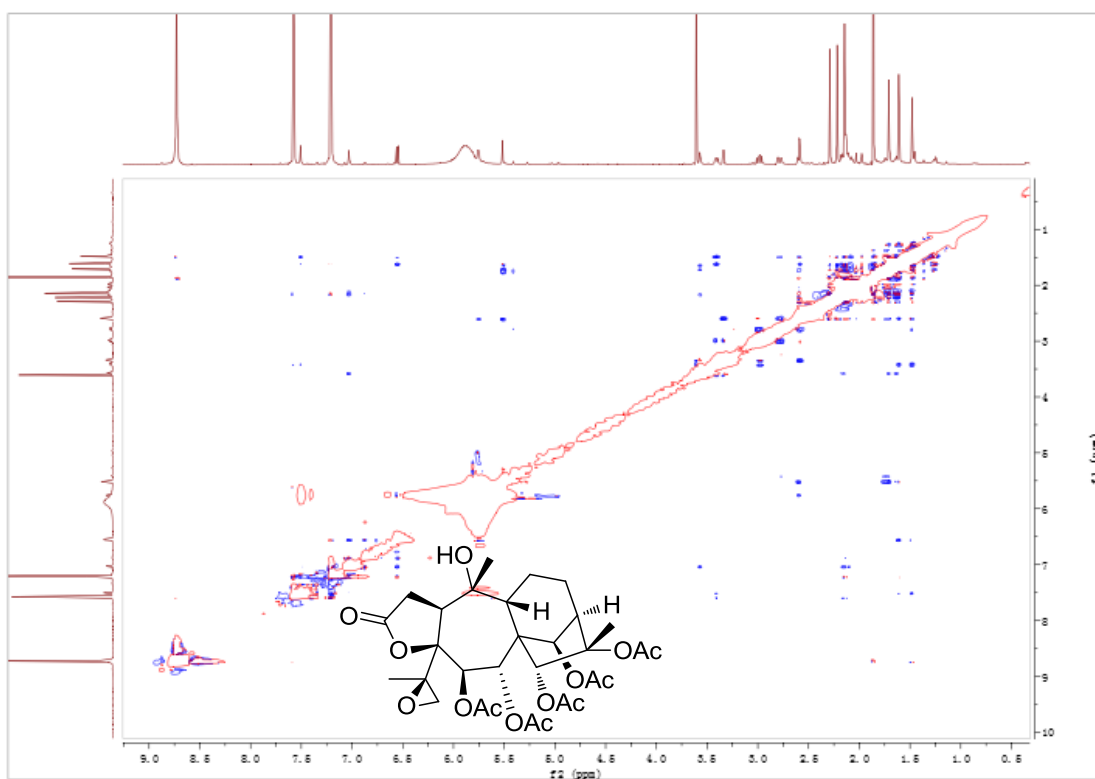

**Figure S115.** NOESY spectrum of **12** (600 MHz, in  $C_5D_5N$ )

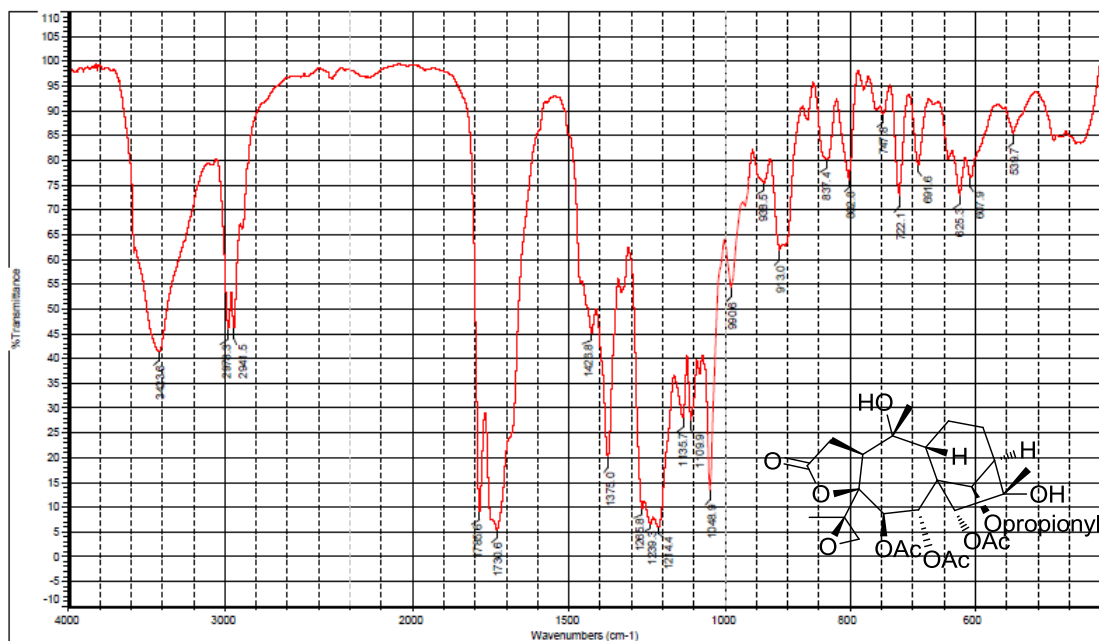

Figure S116. IR spectrum of 13

MS Formula Results: + Scan (5.911 min) Sub (2016090607.d)

| m/z      | Ion                 | Formula        | Abundance |
|----------|---------------------|----------------|-----------|
| 618.2355 | (M+Na) <sup>+</sup> | C29 H40 Na O13 | 10644.9   |

  

| Best | Formula (M)       | Ion Formula          | Score | Cross Sci | Mass     | Calc Mass | Calc m/z | Diff (ppm) | Abs Diff (ppm) | Mass Match | Abund Match | Spacing Match | DfE |
|------|-------------------|----------------------|-------|-----------|----------|-----------|----------|------------|----------------|------------|-------------|---------------|-----|
| ✓    | C29 H40 O13       | C29 H40 Na O13       | 99.48 |           | 596.2463 | 596.2469  | 619.2361 | -1.03      | 1.03           | 99.97      | 99.65       | 99.31         | 10  |
|      | C24 H40 N2 O15    | C24 H40 N2 Na O15    | 98.78 |           | 596.2463 | 596.2429  | 619.2321 | -5.73      | 5.73           | 96.93      | 99.01       | 98.21         | 6   |
|      | C33 H40 O8 S      | C33 H40 Na O8 S      | 97.9  |           | 596.2463 | 596.2444  | 619.2336 | -3.17      | 3.17           | 96.67      | 95.58       | 97.13         | 14  |
|      | C21 H44 N2 O15 S  | C21 H44 N2 Na O15 S  | 97.59 |           | 596.2463 | 596.2462  | 619.2355 | -0.08      | 0.08           | 100        | 94.36       | 96.62         | 1   |
|      | C30 H44 O8 S2     | C30 H44 Na O8 S2     | 96.57 |           | 596.2463 | 596.2478  | 619.2337 | 2.47       | 2.47           | 99.8       | 91.46       | 96.22         | 9   |
|      | C25 H44 N2 O10 S2 | C25 H44 N2 Na O10 S2 | 96.35 |           | 596.2463 | 596.2437  | 619.2333 | -4.28      | 4.28           | 99.4       | 91.55       | 95.99         | 5   |
|      | C42 H32 N2 O2     | C42 H32 N2 Na O2     | 96.08 |           | 596.2463 | 596.2464  | 619.2356 | 0.16       | 0.16           | 100        | 87.53       | 96.51         | 28  |
|      | C39 H36 N2 O2 S   | C39 H36 N2 Na O2 S   | 95.82 |           | 596.2463 | 596.2497  | 619.2339 | 5.81       | 5.81           | 98.9       | 89.77       | 97.36         | 23  |
|      | C34 H44 O3 S3     | C34 H44 Na O3 S3     | 94.07 |           | 596.2463 | 596.2453  | 619.2345 | -1.73      | 1.73           | 99.9       | 82.8        | 96.81         | 13  |
|      | C22 H48 N2 O10 S3 | C22 H48 N2 Na O10 S3 | 93.8  |           | 596.2463 | 596.2471  | 619.2363 | 1.36       | 1.36           | 99.94      | 82.22       | 95.41         | 0   |

Figure S117. (+)-HRESIMS data of 13

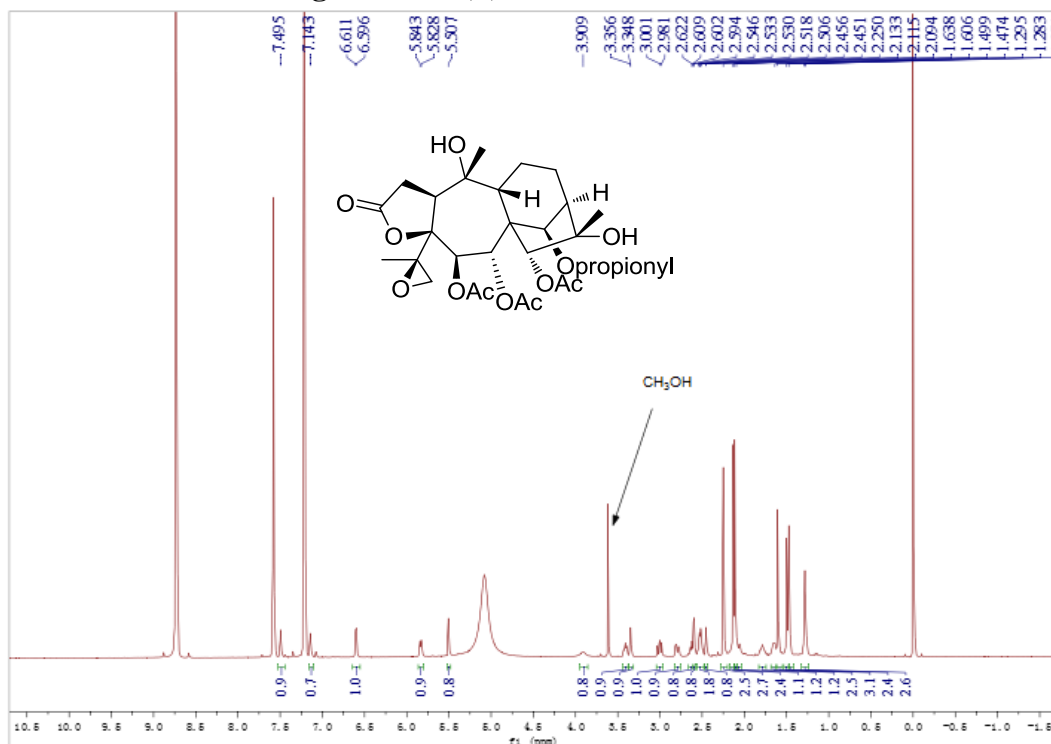

Figure S118. <sup>1</sup>H NMR spectrum of 13 (600 MHz, in C<sub>5</sub>D<sub>5</sub>N)

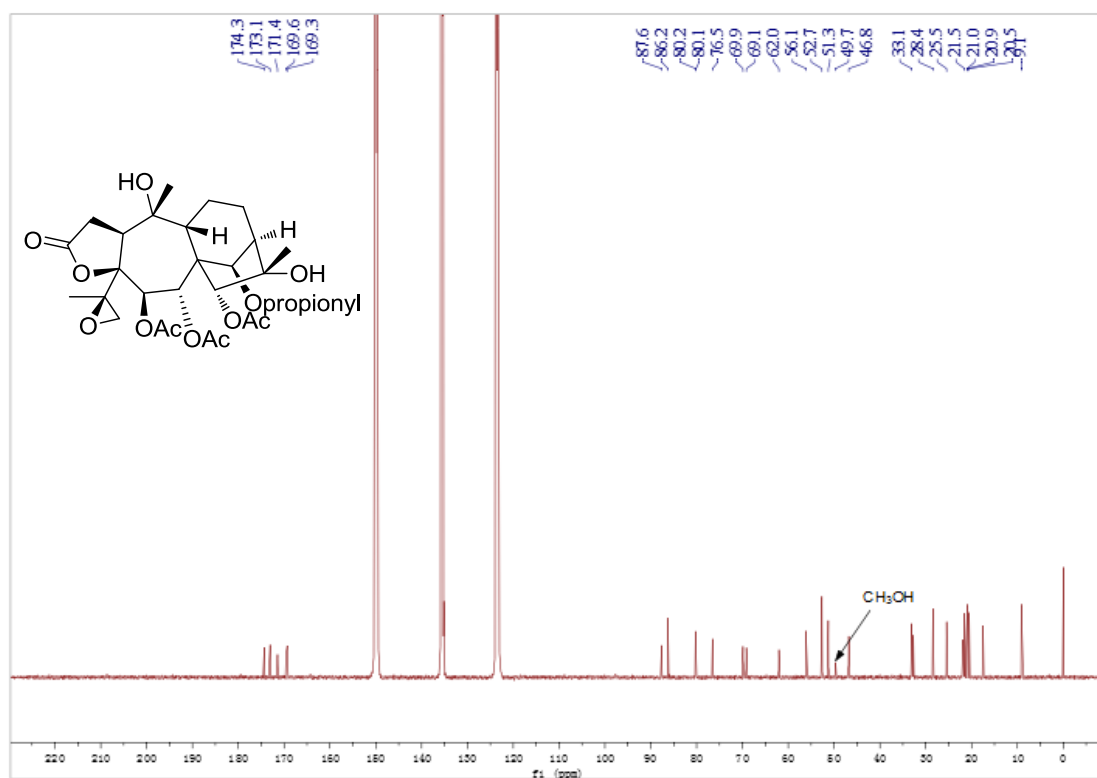

**Figure S119.**  $^{13}\text{C}$  NMR spectrum of **13** (150 MHz, in  $\text{C}_5\text{D}_5\text{N}$ )

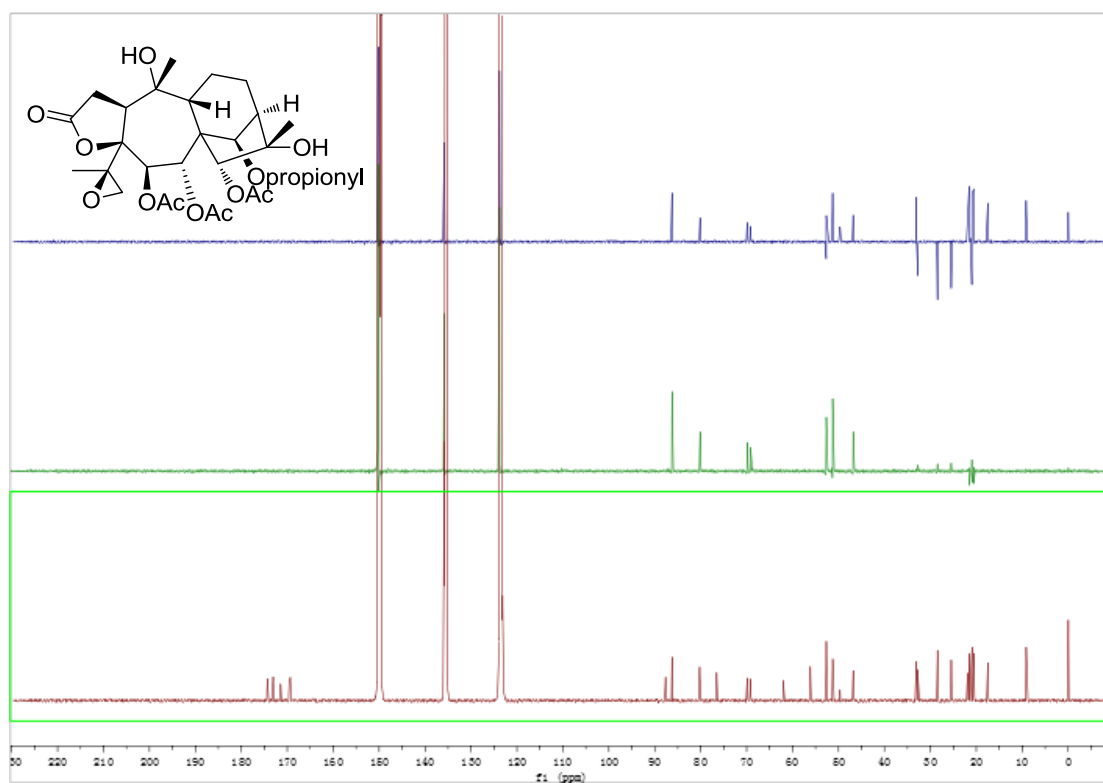

**Figure S120.** DEPT spectrum of **13** (150 MHz, in  $\text{C}_5\text{D}_5\text{N}$ )

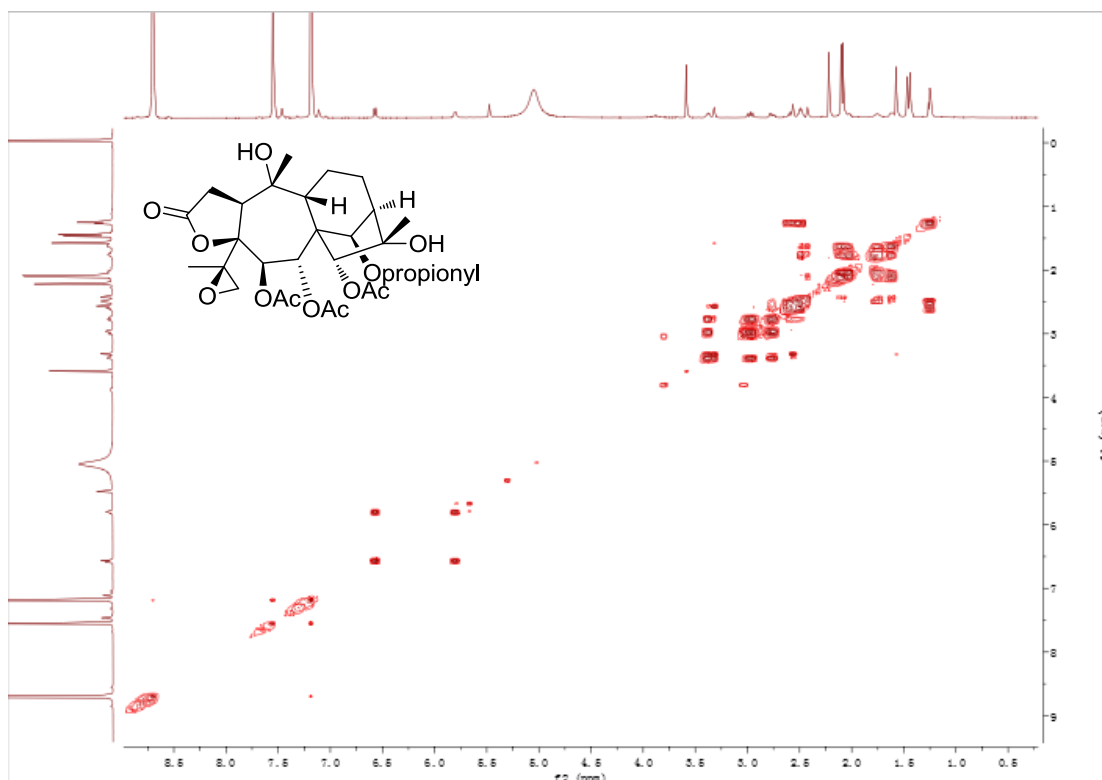

**Figure S121.**  $^1\text{H}$ - $^1\text{H}$  COSY spectrum of **13** (600 MHz, in  $\text{C}_5\text{D}_5\text{N}$ )

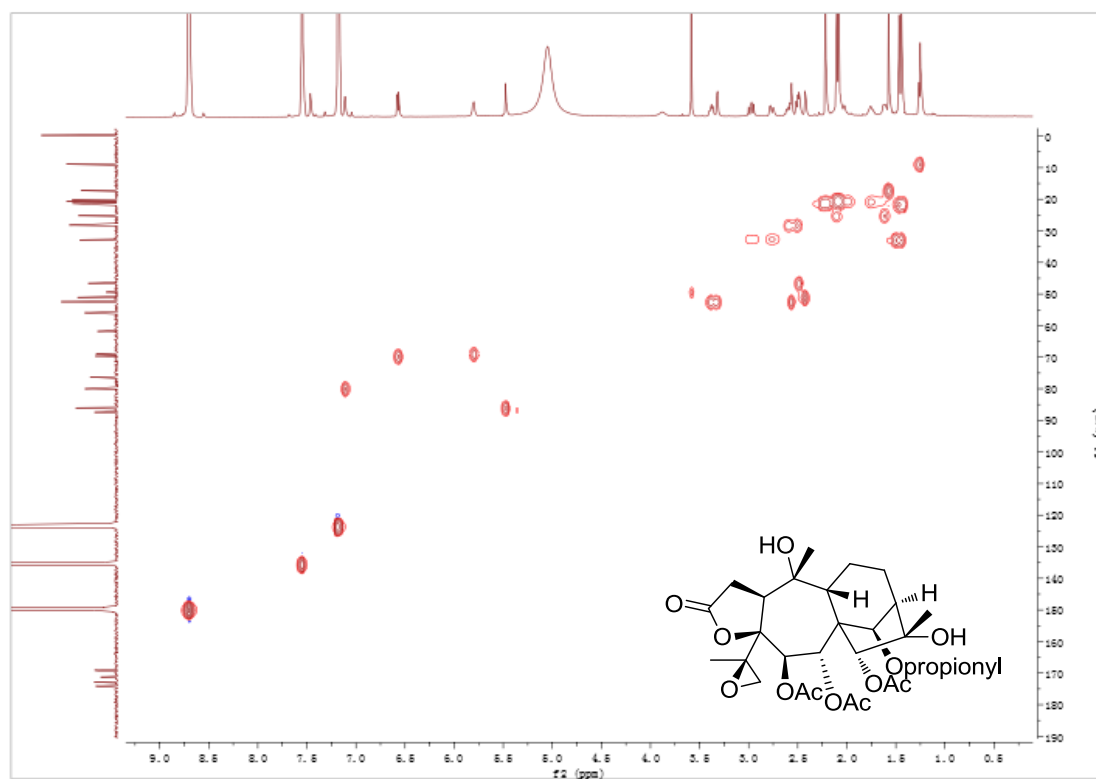

**Figure S122.** HSQC spectrum of **13** (600 MHz, in  $\text{C}_5\text{D}_5\text{N}$ )

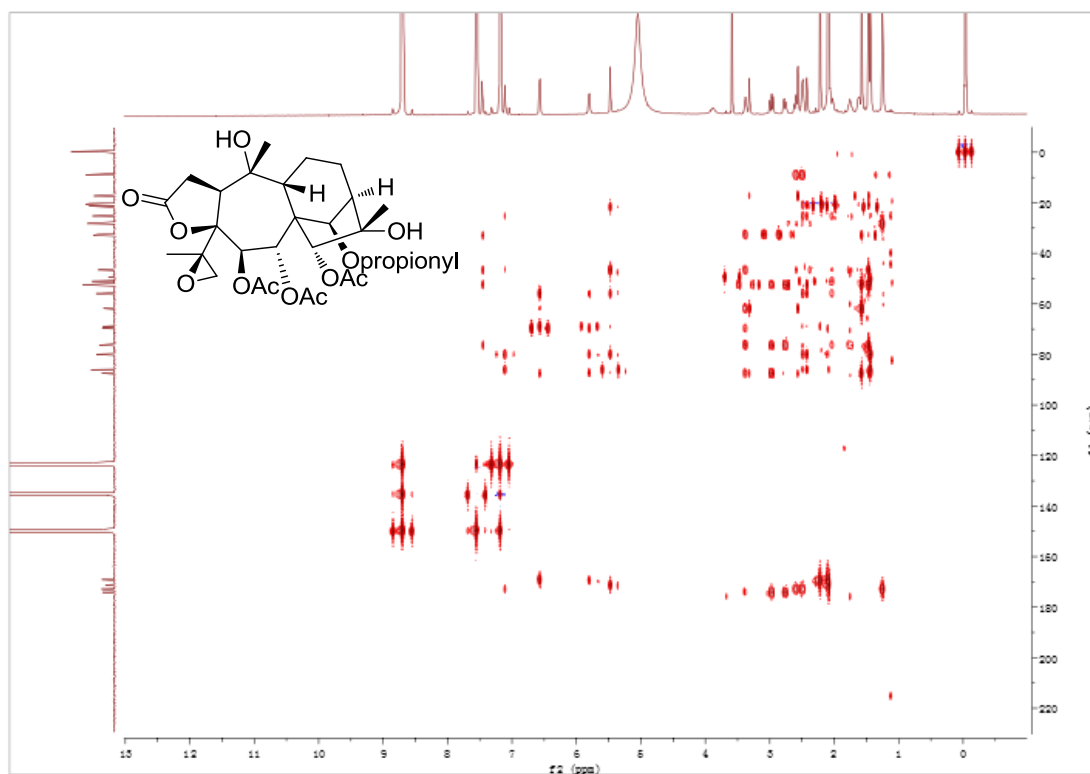

**Figure S123.** HMBC spectrum of **13** (600 MHz, in  $C_5D_5N$ )

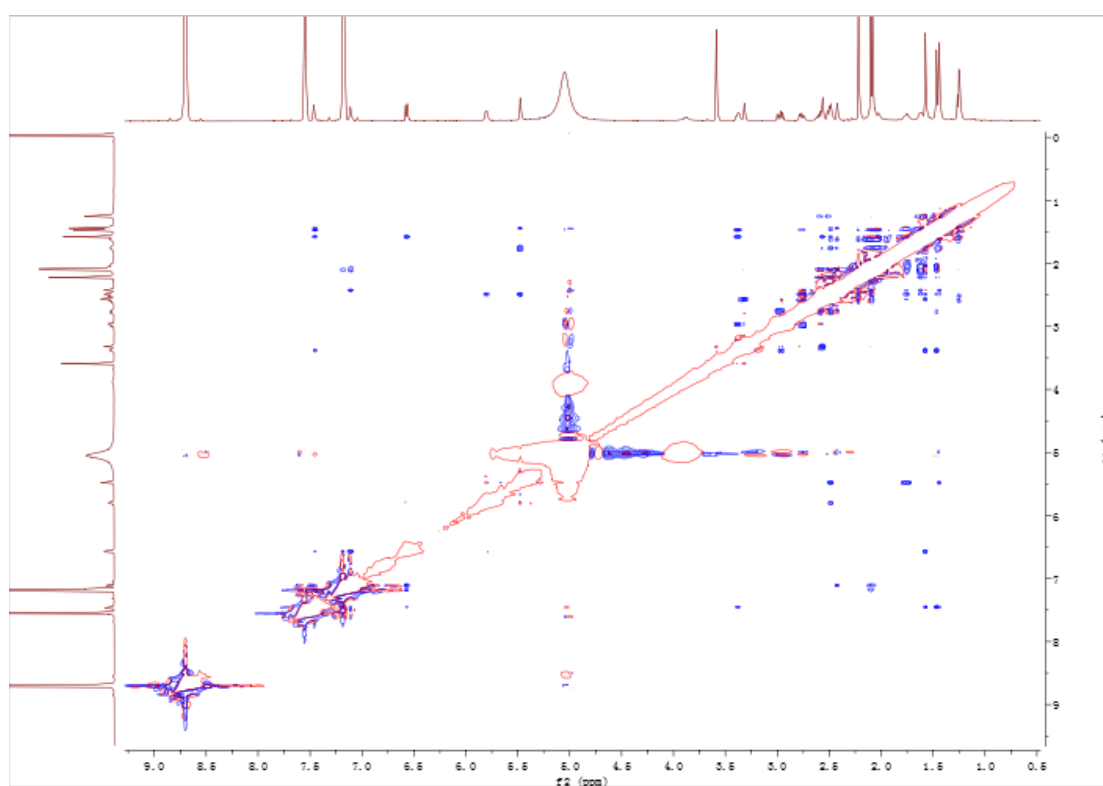

**Figure S124.** NOESY spectrum of **13** (600 MHz, in  $C_5D_5N$ )



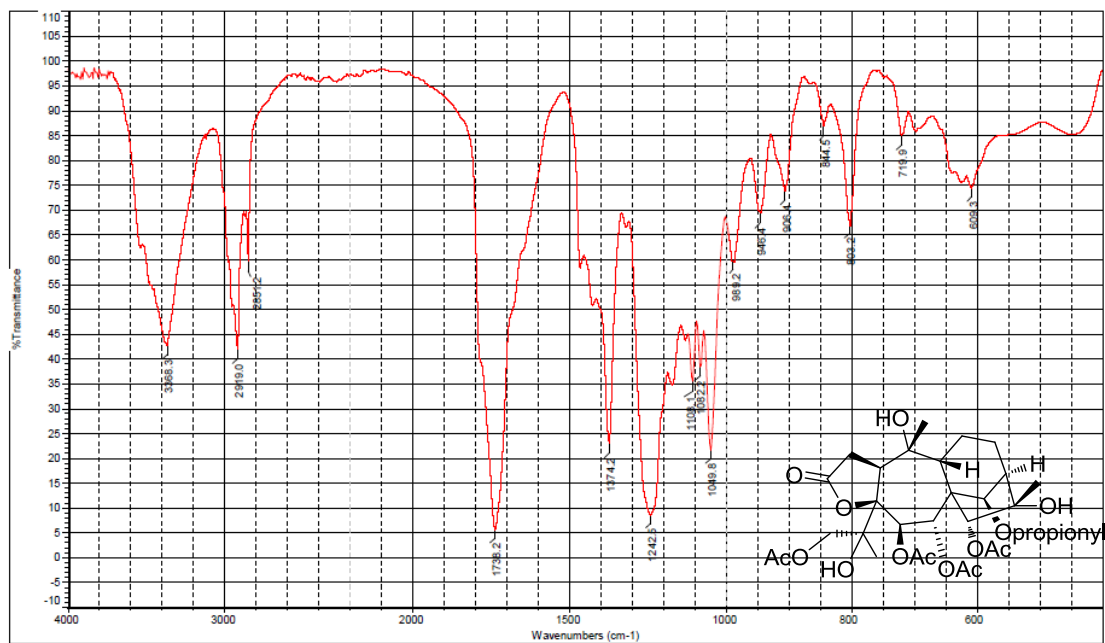

Figure S125. IR spectrum of 14

MS Formula Results: + Scan (5.946 min) Sub (2015060902.d)

| m/z      | Ion                 | Formula        | Abundance |           |         |           |          |            |                |            |             |               |     |
|----------|---------------------|----------------|-----------|-----------|---------|-----------|----------|------------|----------------|------------|-------------|---------------|-----|
| 678.2572 | (M+Na) <sup>+</sup> | C31 H44 Na O15 | 428789.7  |           |         |           |          |            |                |            |             |               |     |
| Best     | Formula (M)         | Ion Formula    | Score     | Cross Sco | Mass    | Calc Mass | Calc m/z | Diff (ppm) | Abs Diff (ppm) | Mass Match | Abund Match | Spacing Match | DBE |
| 14       | ☑                   | C31 H44 Na O15 | 99.93     |           | 656.268 | 656.268   | 678.2572 | 0.1        | 0.1            | 100        | 99.88       | 99.88         | 10  |
| 15       | ☐                   | C32 H40 Na O11 | 99.85     |           | 656.268 | 656.2694  | 678.2586 | 2.12       | 2.12           | 99.85      | 99.8        | 99.92         | 15  |
| 16       | ☐                   | C27 H40 N6 O13 | 99.48     |           | 656.268 | 656.2653  | 678.2546 | -4.02      | 4.02           | 99.46      | 90.11       | 99.96         | 11  |
| 17       | ☐                   | C44 H36 N2 O4  | 97.81     |           | 656.268 | 656.2675  | 678.2567 | -0.69      | 0.69           | 99.98      | 92.5        | 99.86         | 28  |
| 18       | ☐                   | C20 H44 N6 O18 | 97.34     |           | 656.268 | 656.2712  | 678.2604 | 4.92       | 4.92           | 98.7       | 92.03       | 98.98         | 2   |
| 19       | ☐                   | C45 H32 N6     | 97.05     |           | 656.268 | 656.2688  | 678.2581 | 1.33       | 1.33           | 99.94      | 89.86       | 99.9          | 33  |
| 20       | ☐                   | C49 H36 O2     | 96        |           | 656.268 | 656.2715  | 678.2608 | 5.45       | 5.45           | 99.02      | 87.8        | 99.82         | 32  |

Figure S126. (+)-HRESIMS data of 14

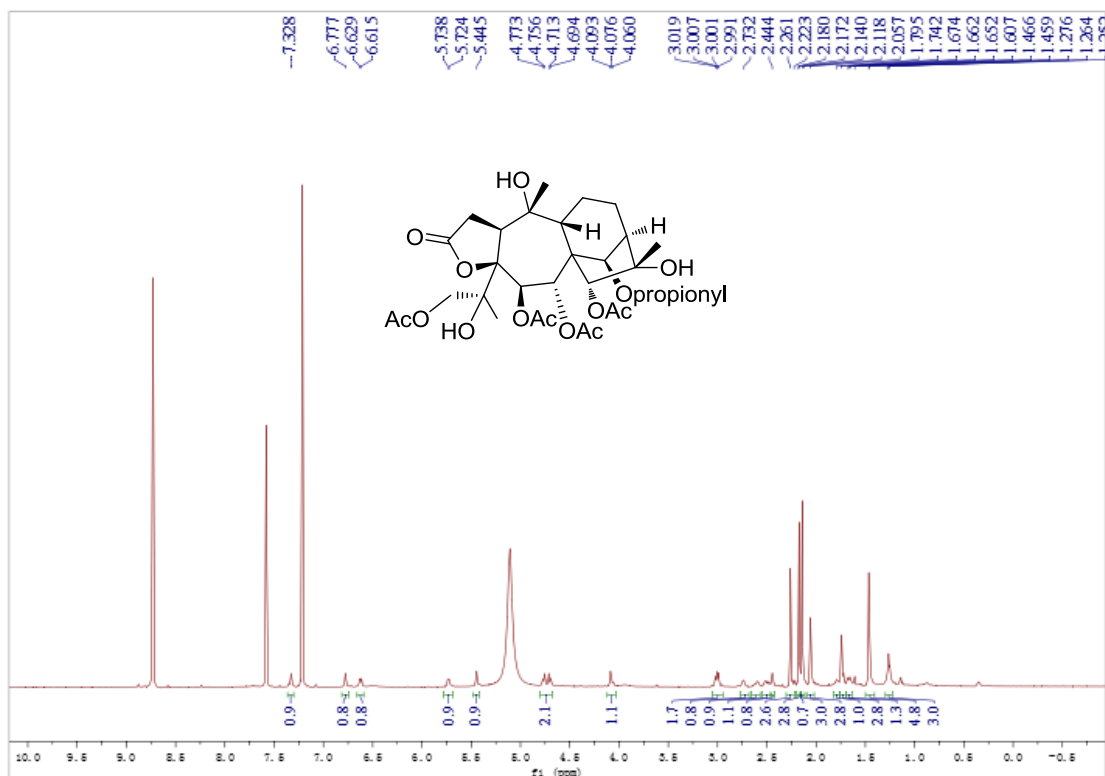

Figure S127. <sup>1</sup>H NMR spectrum of 14 (600 MHz, in C<sub>5</sub>D<sub>5</sub>N)

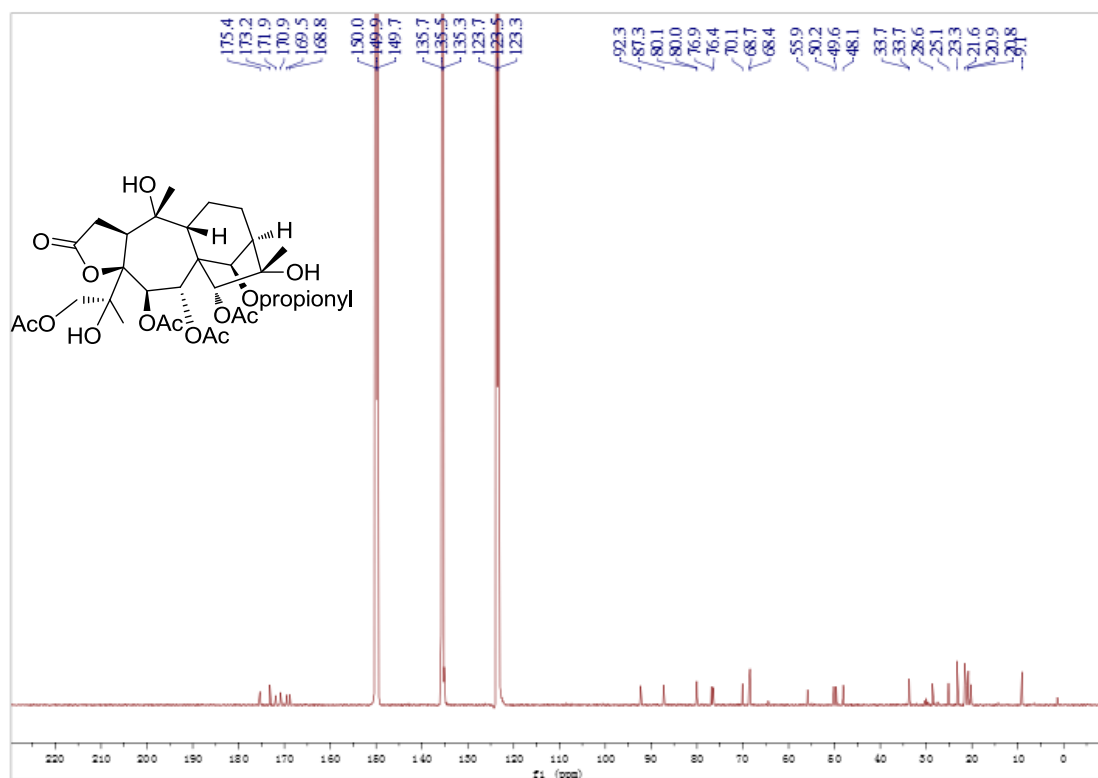

**Figure S128.**  $^{13}\text{C}$  NMR spectrum of **14** (150 MHz, in  $\text{C}_5\text{D}_5\text{N}$ )

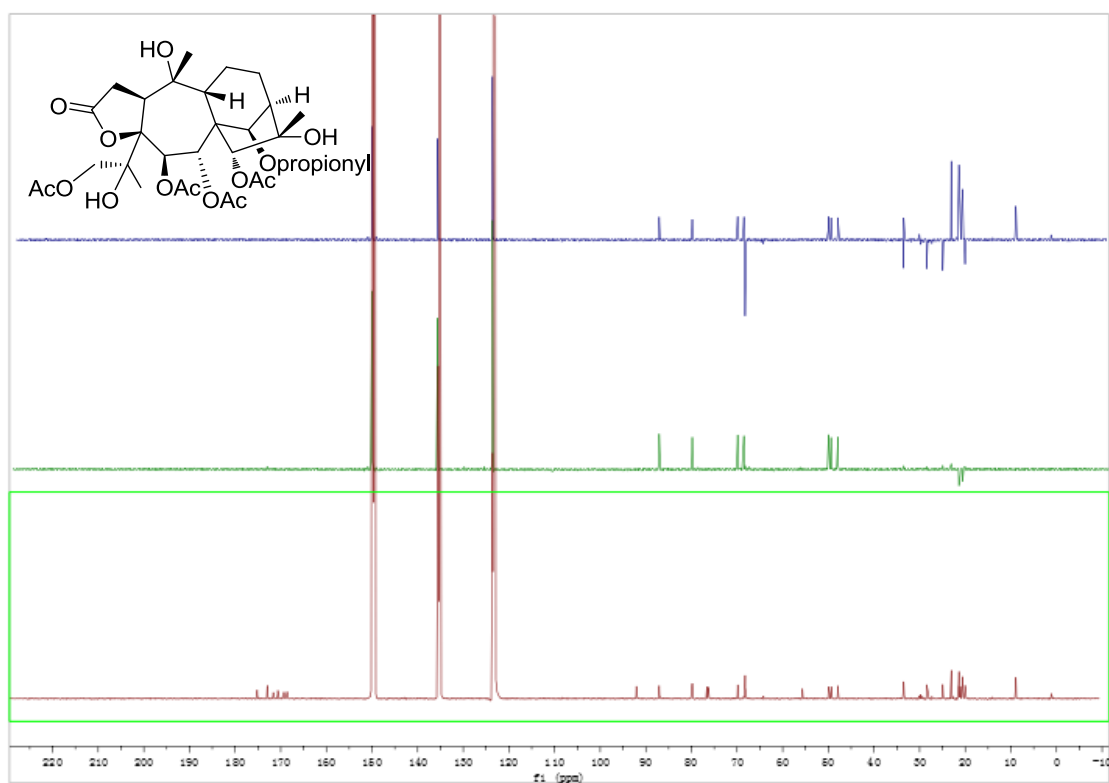

**Figure S129.** DEPT spectrum of **14** (150 MHz, in  $\text{C}_5\text{D}_5\text{N}$ )

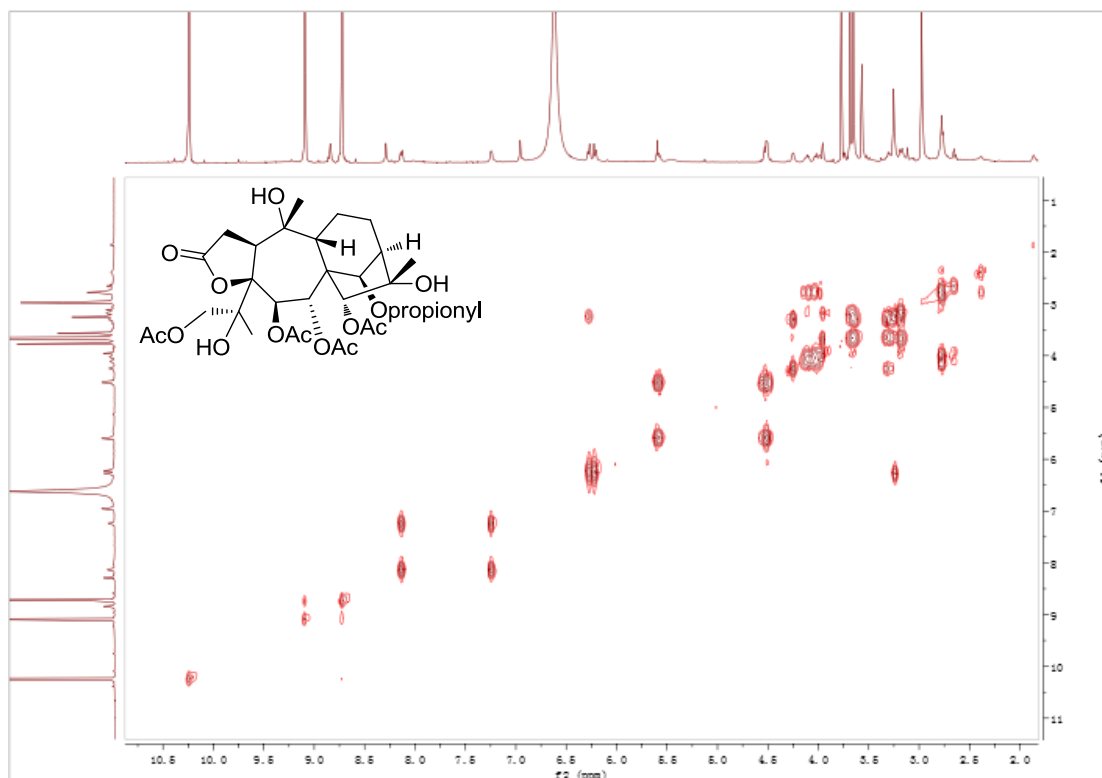

**Figure S130.**  $^1\text{H}$ - $^1\text{H}$  COSY spectrum of **14** (600 MHz, in  $\text{C}_5\text{D}_5\text{N}$ )

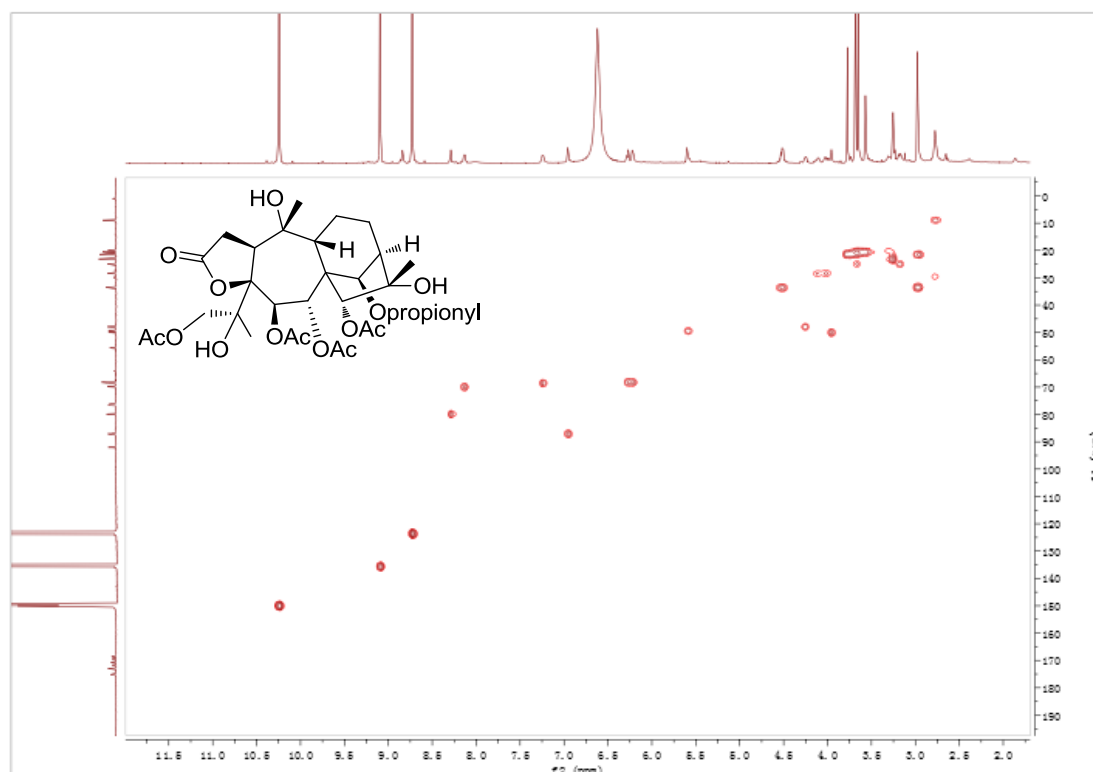

**Figure S131.** HSQC spectrum of **14** (600 MHz, in  $\text{C}_5\text{D}_5\text{N}$ )

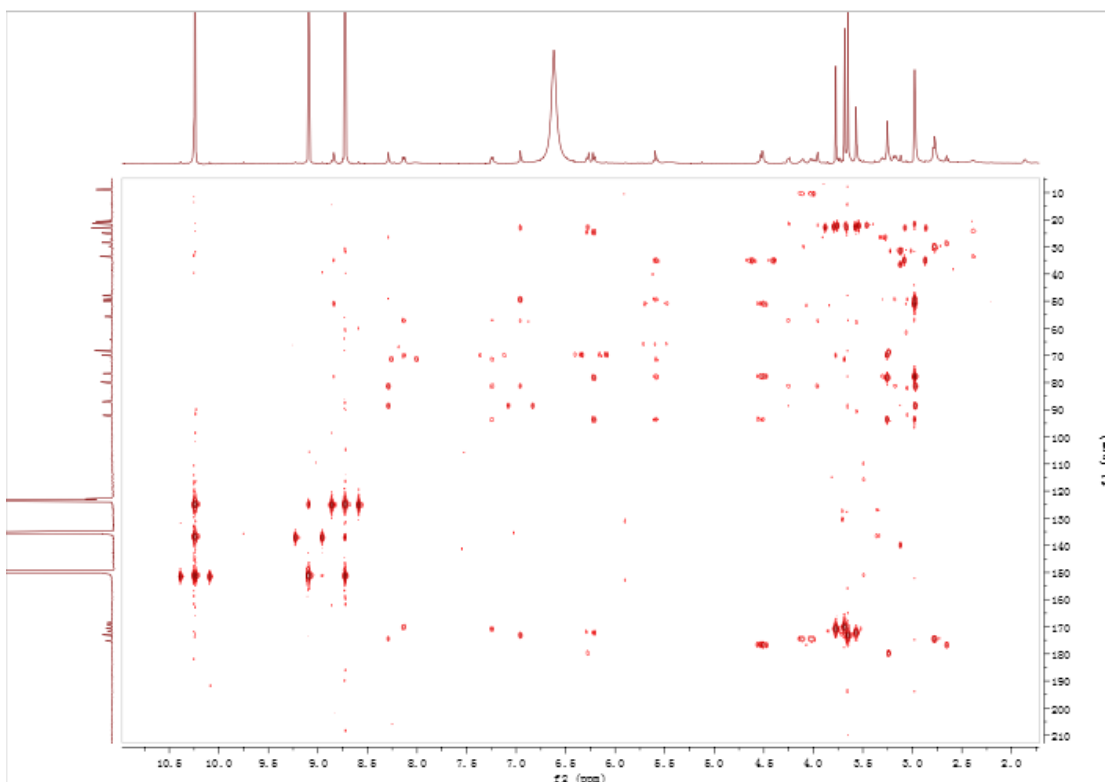

**Figure S132.** HMBC spectrum of **14** (600 MHz, in  $C_5D_5N$ )

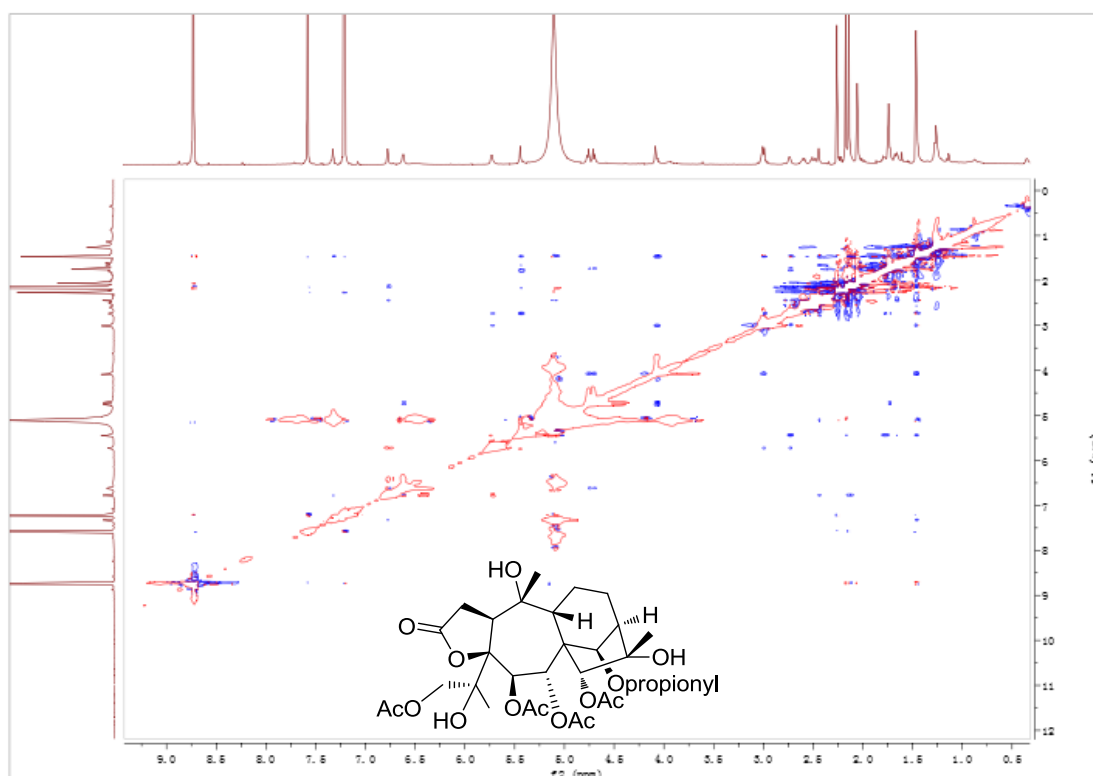

**Figure S133.** NOESY spectrum of **14** (600 MHz, in  $C_5D_5N$ )

**Table S4.** Crystal data and structure refinement for **14**

|                                                                                         |                                                   |
|-----------------------------------------------------------------------------------------|---------------------------------------------------|
| Identification code                                                                     | exp_3672                                          |
| Empirical formula                                                                       | C <sub>31</sub> H <sub>46</sub> O <sub>16</sub>   |
| Formula weight                                                                          | 674.68                                            |
| Temperature/K                                                                           | 102.3                                             |
| Crystal system                                                                          | orthorhombic                                      |
| Space group                                                                             | P2 <sub>1</sub> 2 <sub>1</sub> 2 <sub>1</sub>     |
| a / Å, b / Å, c / Å                                                                     | 11.0687(2), 12.2272(4), 23.8020(5)                |
| $\alpha$ /°, $\beta$ /°, $\gamma$ /°                                                    | 90.00, 90.00, 90.00                               |
| Volume/Å <sup>3</sup>                                                                   | 3221.34(15)                                       |
| Z                                                                                       | 4                                                 |
| $\rho_{\text{calc}}$ /mg mm <sup>-3</sup>                                               | 1.391                                             |
| $\mu$ /mm <sup>-1</sup>                                                                 | 0.954                                             |
| F(000)                                                                                  | 1440                                              |
| Crystal size/mm <sup>3</sup>                                                            | 0.15 × 0.14 × 0.12                                |
| 2 $\theta$ range for data collection                                                    | 7.42 to 142.62°                                   |
| Index ranges                                                                            | -13 ≤ h ≤ 8, -14 ≤ k ≤ 14, -28 ≤ l ≤ 22           |
| Reflections collected                                                                   | 11345                                             |
| Independent reflections                                                                 | 6114[R(int) = 0.0316 (inf-0.9Å)]                  |
| Data/restraints/parameters                                                              | 6114/0/435                                        |
| Goodness-of-fit on F <sup>2</sup>                                                       | 1.051                                             |
| Final R indexes [I > 2 $\sigma$ (I) i.e. F <sub>o</sub> > 4 $\sigma$ (F <sub>o</sub> )] | R <sub>1</sub> = 0.0480, wR <sub>2</sub> = 0.1234 |
| Final R indexes [all data]                                                              | R <sub>1</sub> = 0.0512 wR <sub>2</sub> = 0.1273  |
| Largest diff. peak/hole/e Å <sup>-3</sup>                                               | 0.456/-0.250                                      |
| Flack Parameters                                                                        | 0.04(16)                                          |
| Completeness                                                                            | 0.987                                             |

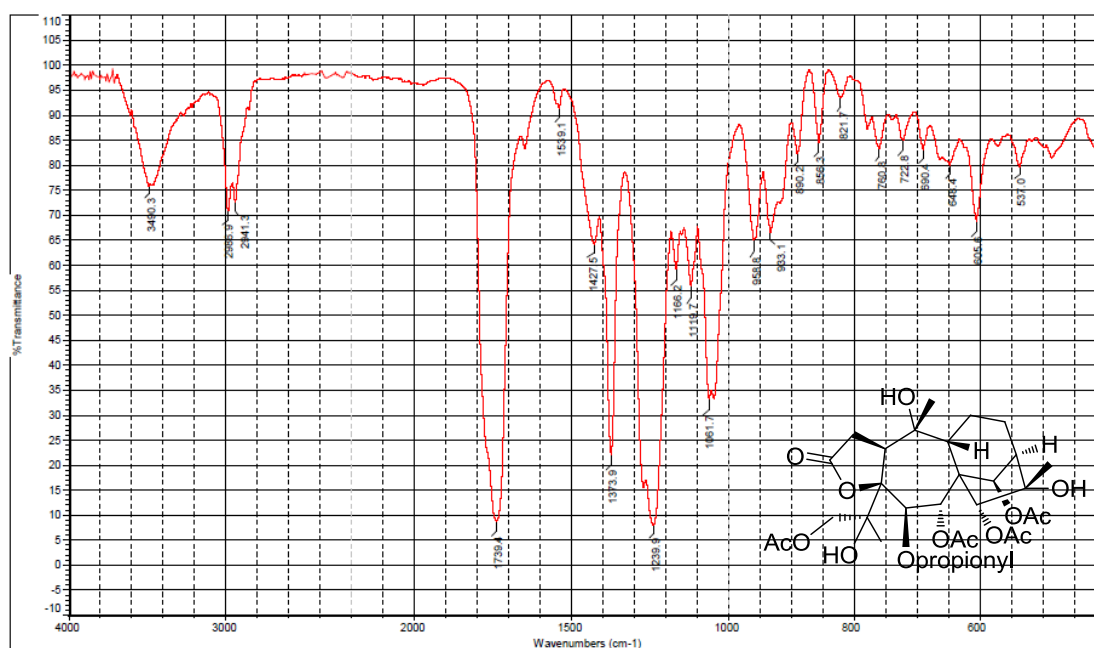**Figure S134.** IR spectrum of **15**

MS Formula Results: + Scan (5.952 min) Sub (2015060901.d)

| m/z      | Ion                 | Formula        | Abundance |
|----------|---------------------|----------------|-----------|
| 679.2572 | (M-Na) <sup>+</sup> | C31 H44 Na O15 | 208514.9  |

  

| Best | Formula (M)    | Ion Formula       | Score | Cross Sco | Mass    | Calc Mass | Calc m/z | Diff (ppm) | Abs Diff (ppm) | Mass Match | Abund Match | Spacing Match | DBE |
|------|----------------|-------------------|-------|-----------|---------|-----------|----------|------------|----------------|------------|-------------|---------------|-----|
| ✓    | C31 H44 O15    | C31 H44 Na O15    | 99.9  |           | 656.268 | 656.268   | 679.2572 | 0.09       | 0.09           | 100        | 99.76       | 99.85         | 10  |
| ✓    | C30 H40 Na O11 | C30 H40 Na O11    | 95.6  |           | 656.268 | 656.264   | 679.2586 | 2.11       | 2.11           | 95.85      | 98.96       | 99.88         | 15  |
| ✓    | C27 H40 N6 O13 | C27 H40 N6 Na O13 | 99.58 |           | 656.268 | 656.2653  | 679.2546 | -4.03      | 4.03           | 99.46      | 99.49       | 99.92         | 11  |
| ✓    | C20 H44 N6 O18 | C20 H44 N6 Na O18 | 98.06 |           | 656.268 | 656.2712  | 679.2604 | 4.91       | 4.91           | 99.2       | 94.6        | 99.95         | 2   |
| ✓    | C44 H36 N3 O4  | C44 H36 N3 Na O4  | 98.88 |           | 656.268 | 656.2675  | 679.2597 | -0.71      | 0.71           | 99.98      | 99.3        | 99.79         | 26  |
| ✓    | C45 H32 N6     | C45 H32 N6 Na     | 98    |           | 656.268 | 656.2688  | 679.2581 | 1.33       | 1.33           | 99.94      | 88.36       | 99.82         | 33  |
| ✓    | C49 H36 O2     | C49 H36 Na O2     | 94.93 |           | 656.268 | 656.2715  | 679.2608 | 5.43       | 5.43           | 99.02      | 84.11       | 99.74         | 32  |

Figure S135. (+)-HRESIMS data of **15**

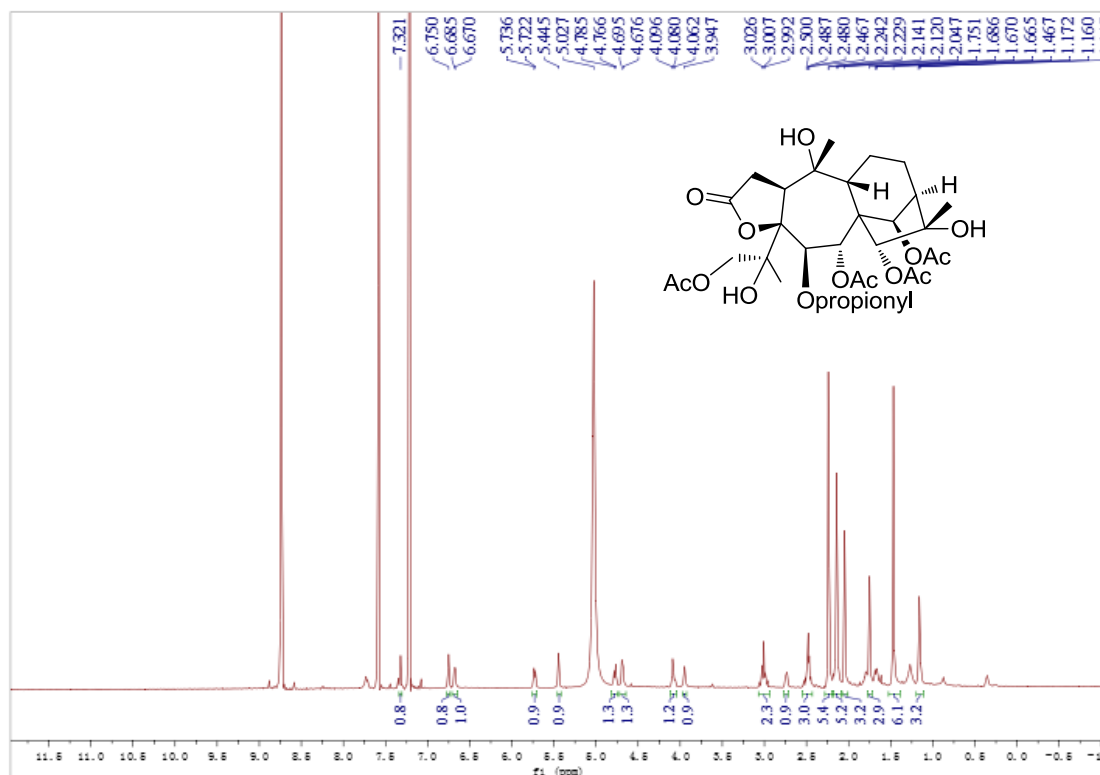

Figure S136. <sup>1</sup>H NMR spectrum of **15** (600 MHz, in C<sub>5</sub>D<sub>5</sub>N)

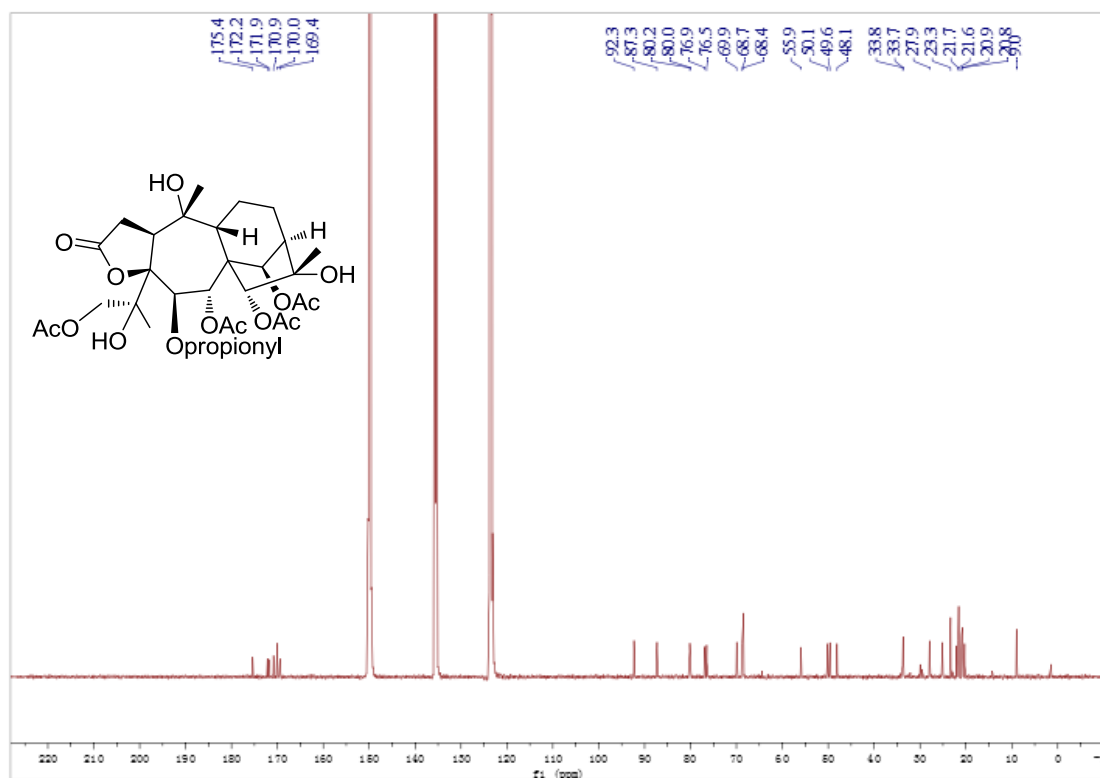

**Figure S137.**  $^{13}\text{C}$  NMR spectrum of **15** (150 MHz, in  $\text{C}_5\text{D}_5\text{N}$ )

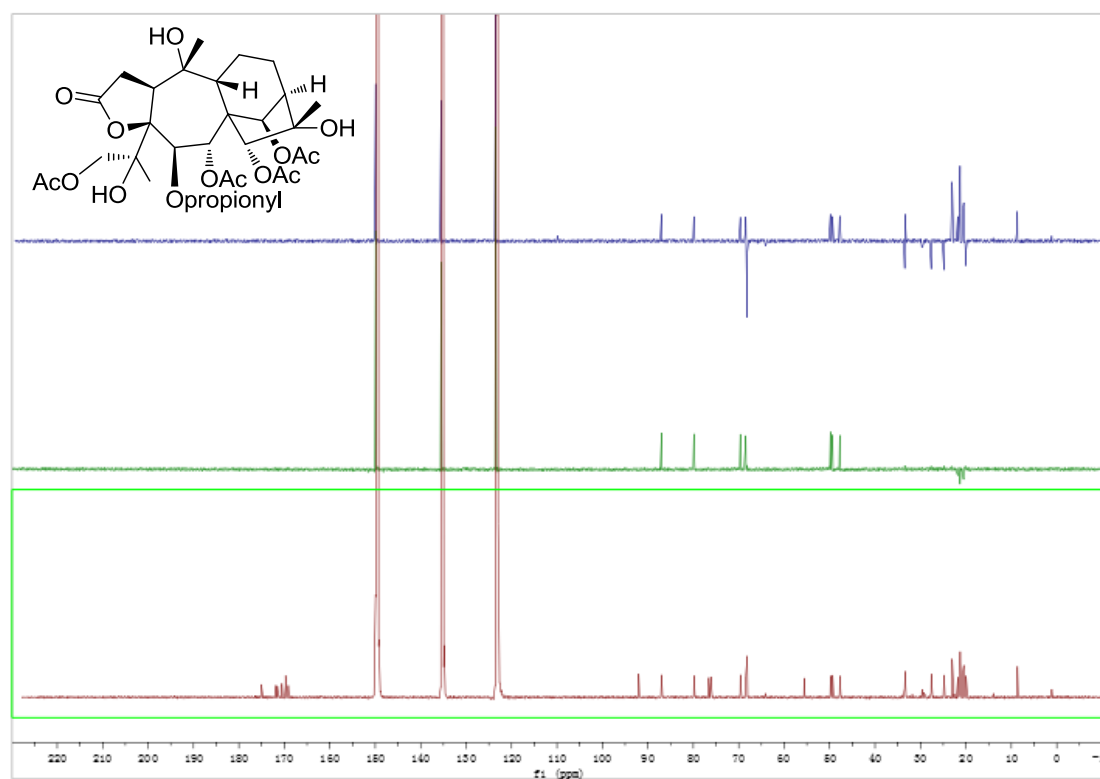

**Figure S138.** DEPT spectrum of **15** (150 MHz, in  $\text{C}_5\text{D}_5\text{N}$ )

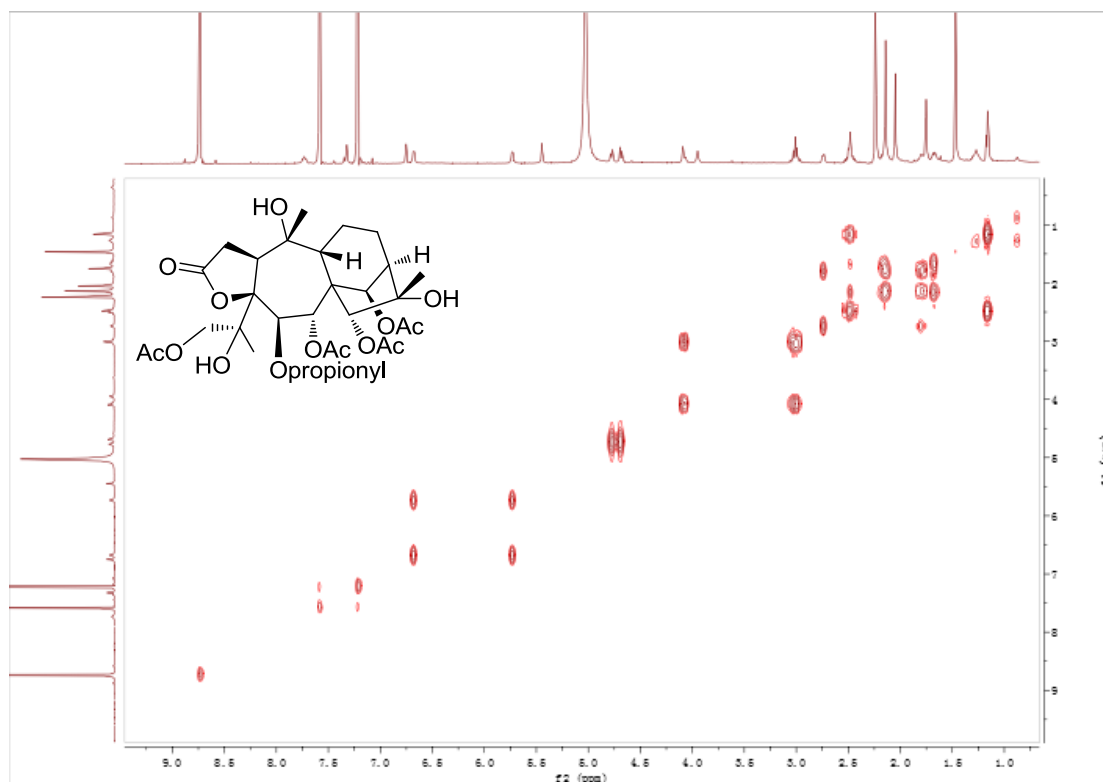

**Figure S139.**  $^1\text{H}$ - $^1\text{H}$  COSY spectrum of **15** (600 MHz, in  $\text{C}_5\text{D}_5\text{N}$ )

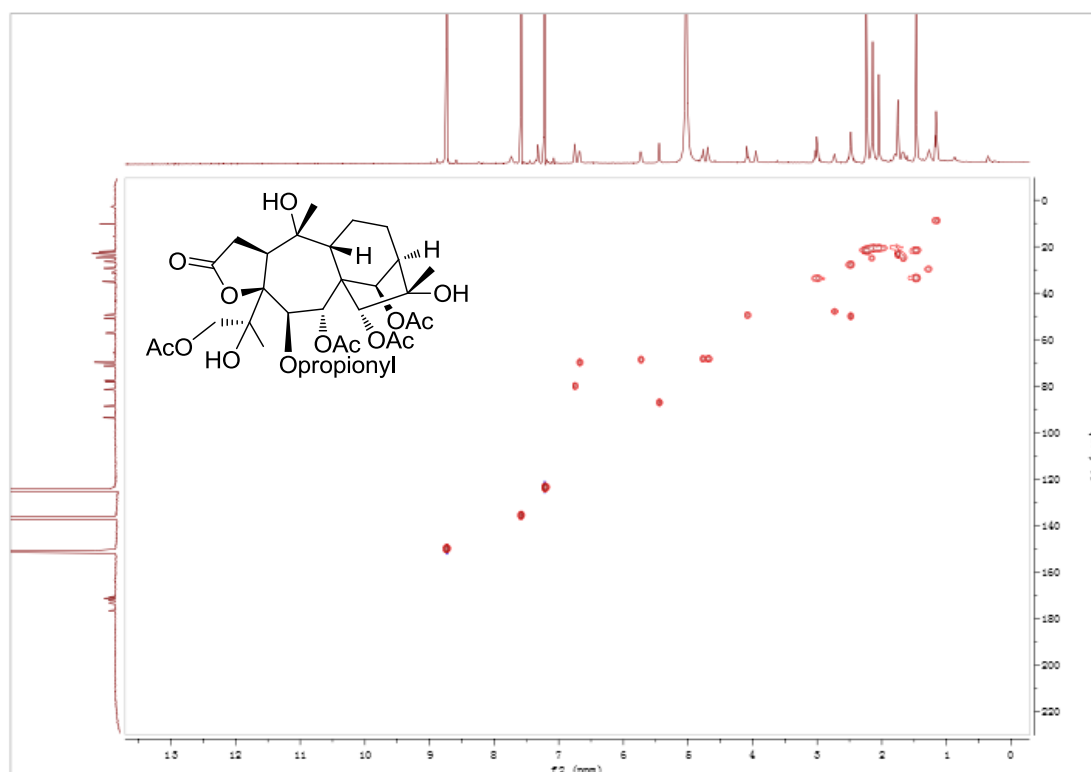

**Figure S140.** HSQC spectrum of **15** (600 MHz, in  $\text{C}_5\text{D}_5\text{N}$ )



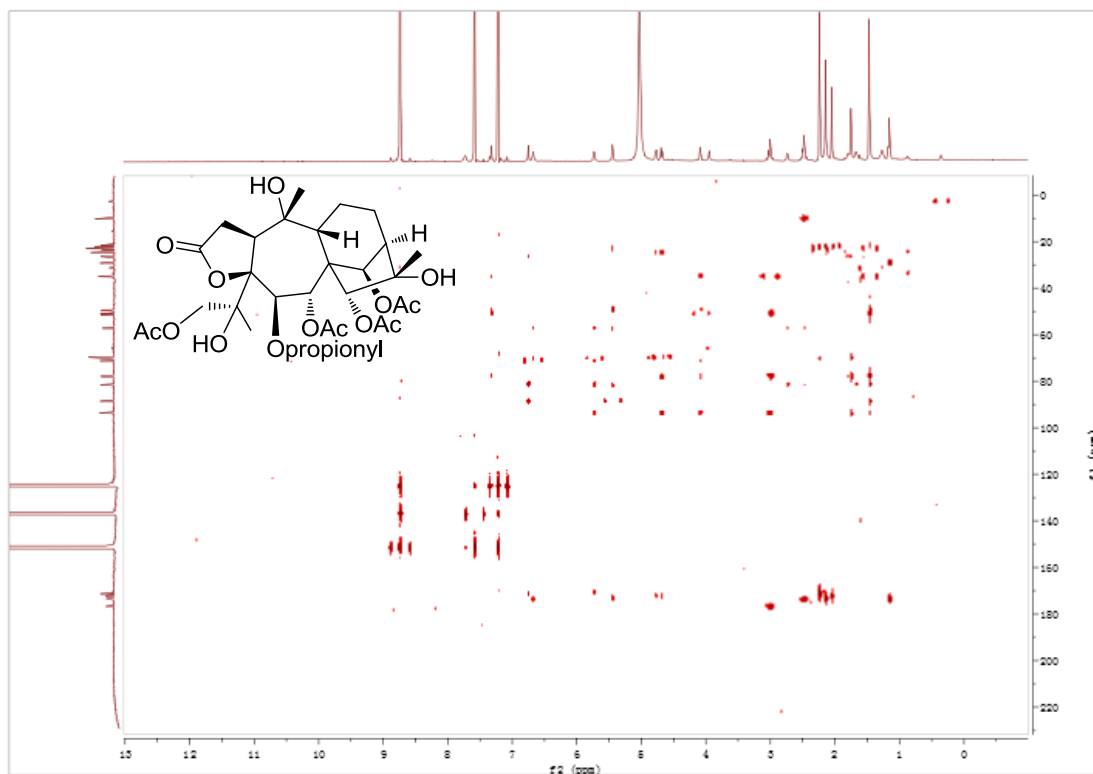

**Figure S141.** HMBC spectrum of **15** (600 MHz, in  $\text{C}_5\text{D}_5\text{N}$ )

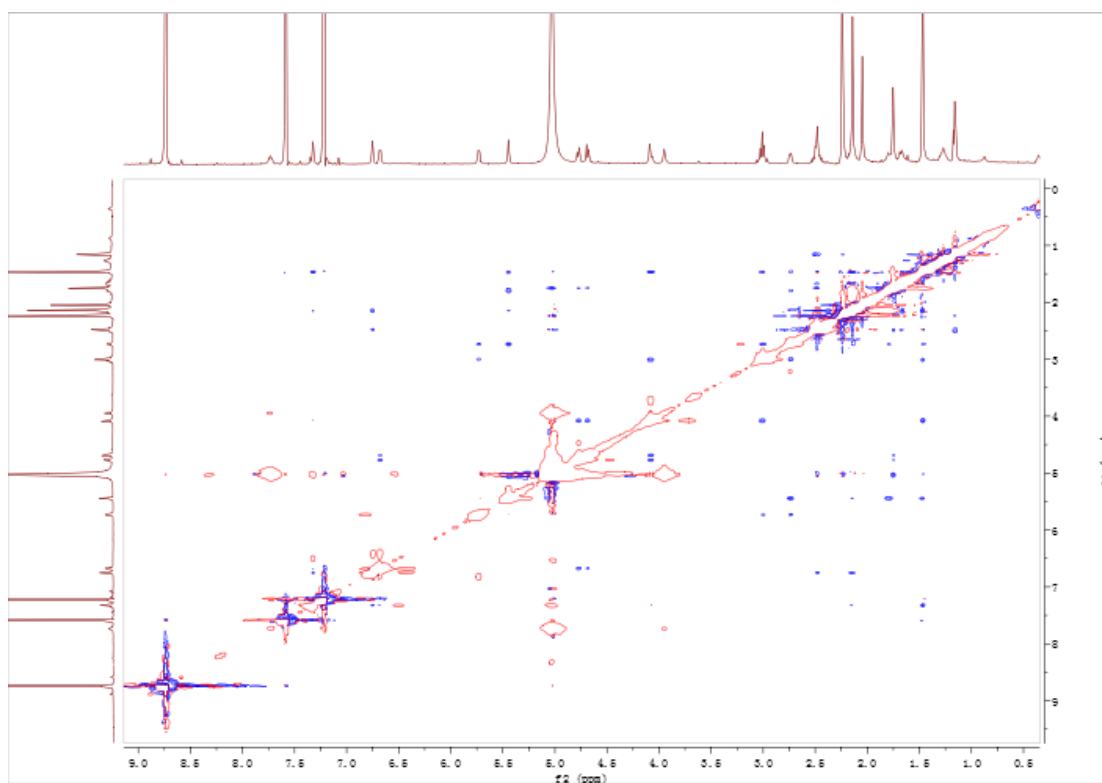

**Figure S142.** NOESY spectrum of **15** (600 MHz, in  $\text{C}_5\text{D}_5\text{N}$ )

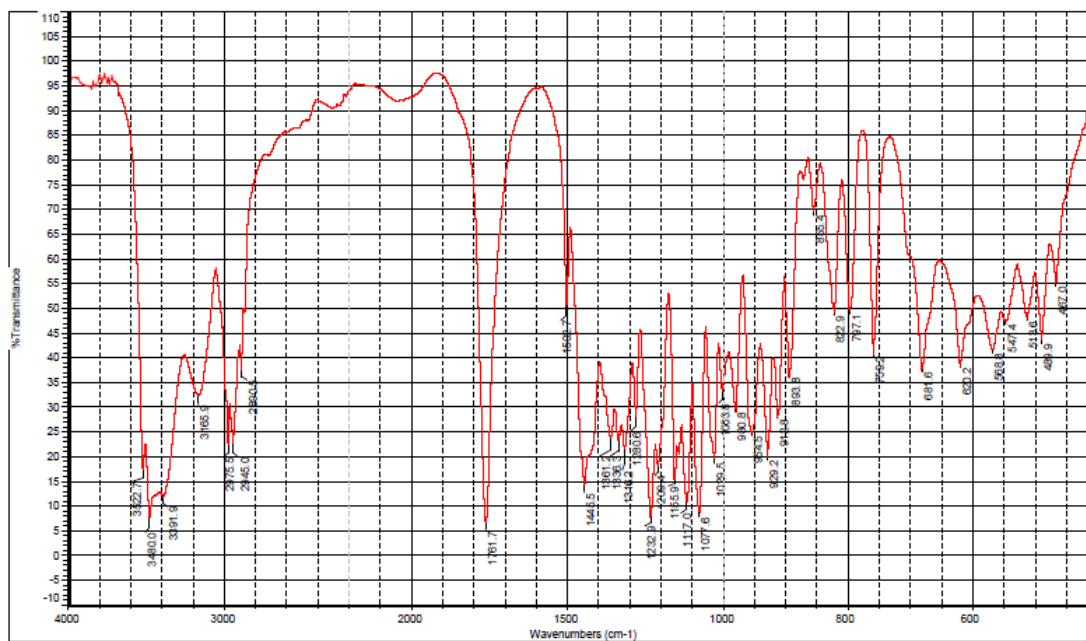

Figure S143. IR spectrum of 16

MS Formula Results: + Scan (3.247 min) Sub (2016111404.d)

| m/z      | Ion                | Formula    | Abundance |
|----------|--------------------|------------|-----------|
| 417.2123 | (M+H) <sup>+</sup> | C20 H33 O9 | 841007.5  |

  

| Best | Formula (M)   | Ion Formula   | Score | Cross Sco | Mass    | Calc. Mass | Calc. m/z | Diff (ppm) | Abs. Diff (ppm) | Mass Match | Abund. Match | Spacing Match | DBE |
|------|---------------|---------------|-------|-----------|---------|------------|-----------|------------|-----------------|------------|--------------|---------------|-----|
| ✓    | C20 H32 O9    | C20 H33 O9    | 99.98 |           | 416.205 | 416.2046   | 417.2118  | -0.95      | 0.95            | 99.97      | 99.92        | 99.97         | 5   |
| □    | C21 H38 O4 S2 | C21 H37 O4 S2 | 97.31 |           | 416.205 | 416.2055   | 417.2128  | 1.13       | 1.13            | 99.96      | 90.91        | 90.89         | 4   |

Figure S144. (+)-HRESIMS data of 16

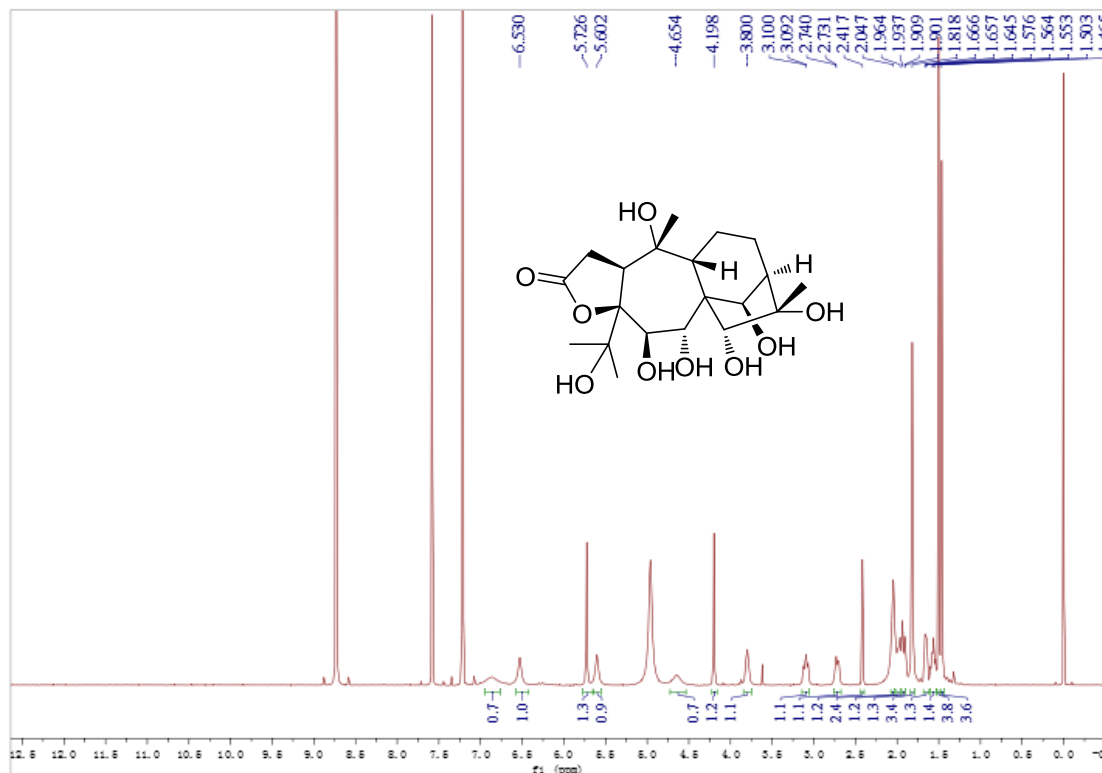

Figure S145. <sup>1</sup>H NMR spectrum of 16 (600 MHz, in C<sub>5</sub>D<sub>5</sub>N)

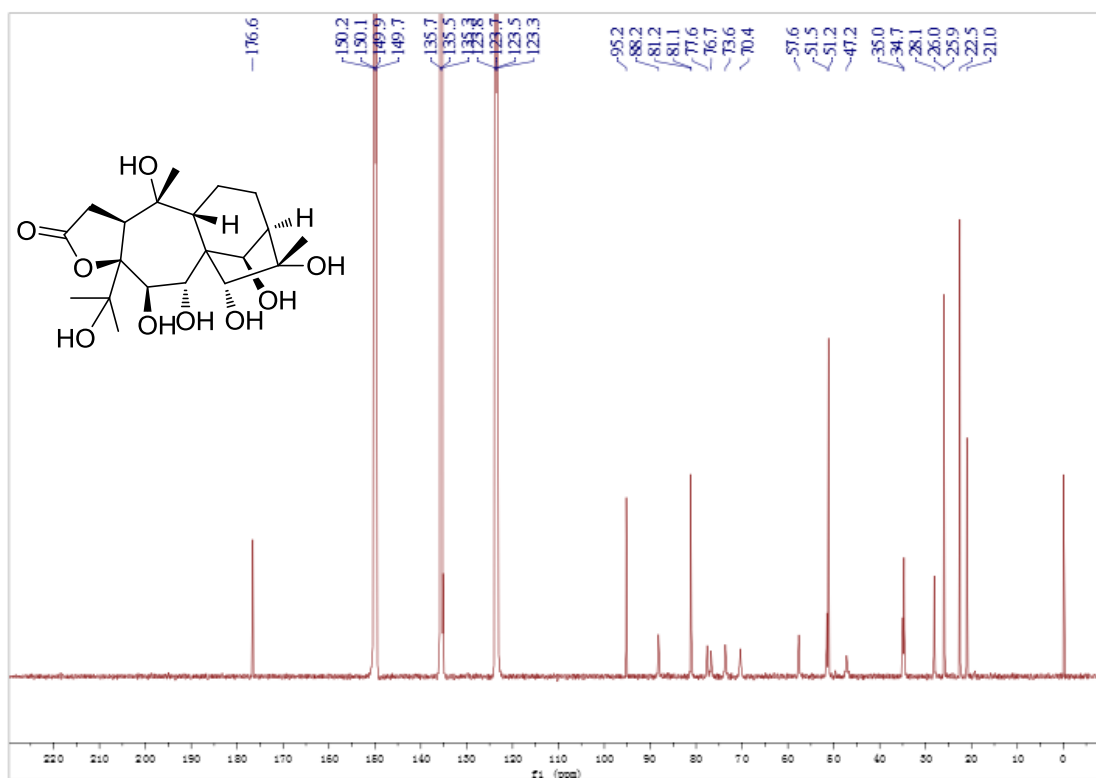

**Figure S146.**  $^{13}\text{C}$  NMR spectrum of **16** (150 MHz, in  $\text{C}_5\text{D}_5\text{N}$ )

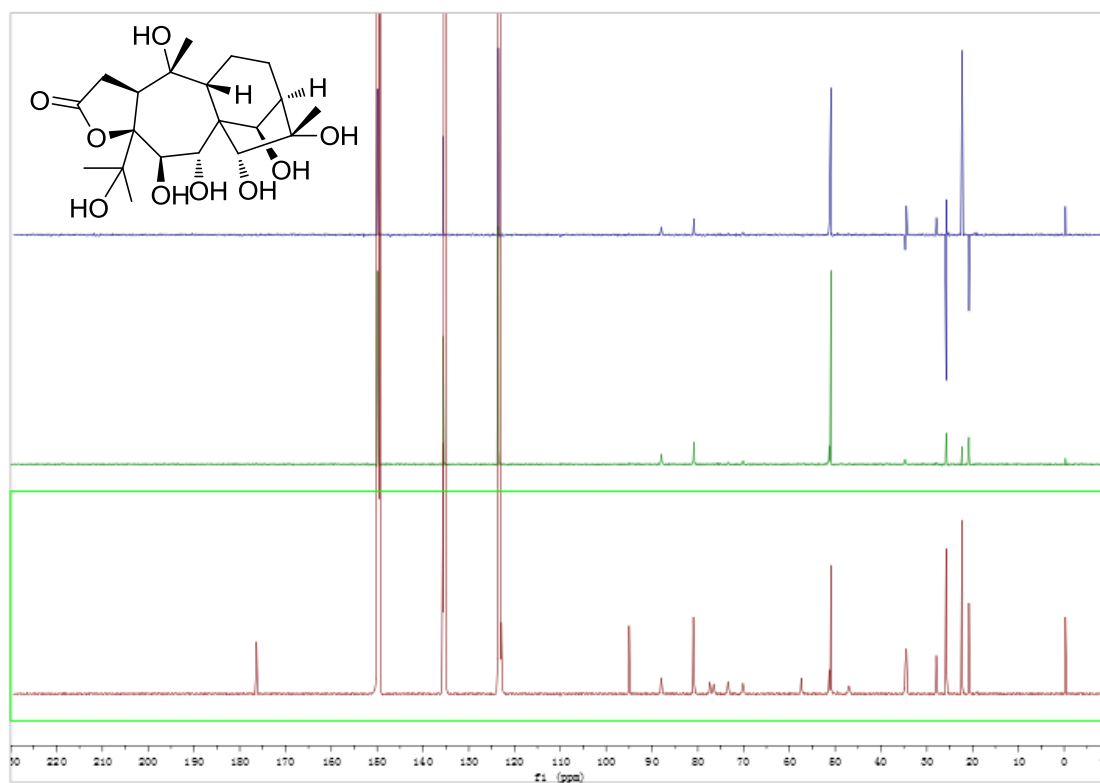

**Figure S147.** DEPT spectrum of **16** (150 MHz, in  $\text{C}_5\text{D}_5\text{N}$ )

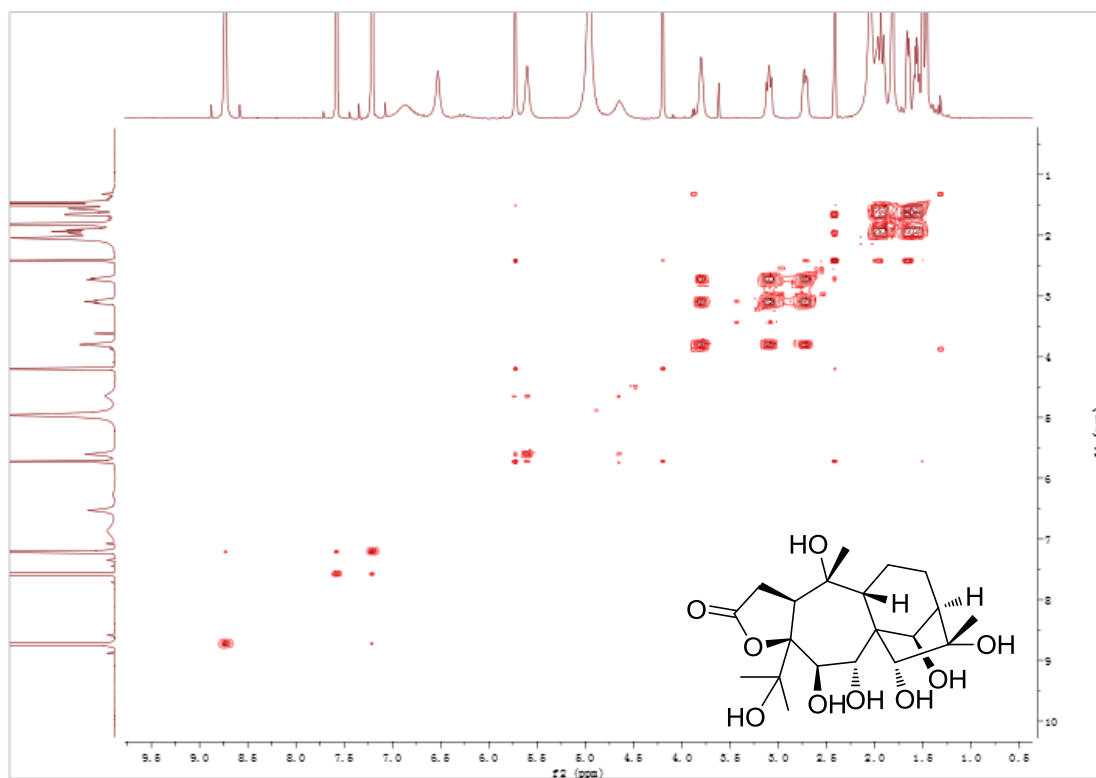

**Figure S148.**  $^1\text{H}$ - $^1\text{H}$  COSY spectrum of **16** (600 MHz, in  $\text{C}_5\text{D}_5\text{N}$ )

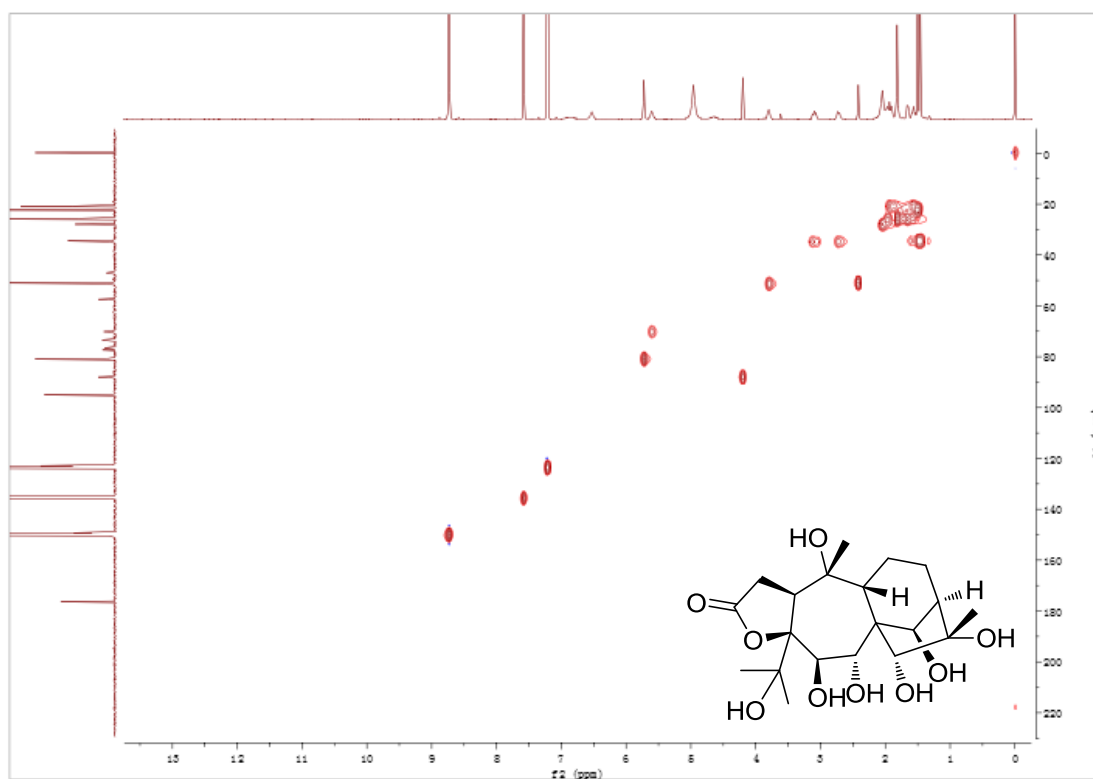

**Figure S149.** HSQC spectrum of **16** (600 MHz, in  $\text{C}_5\text{D}_5\text{N}$ )

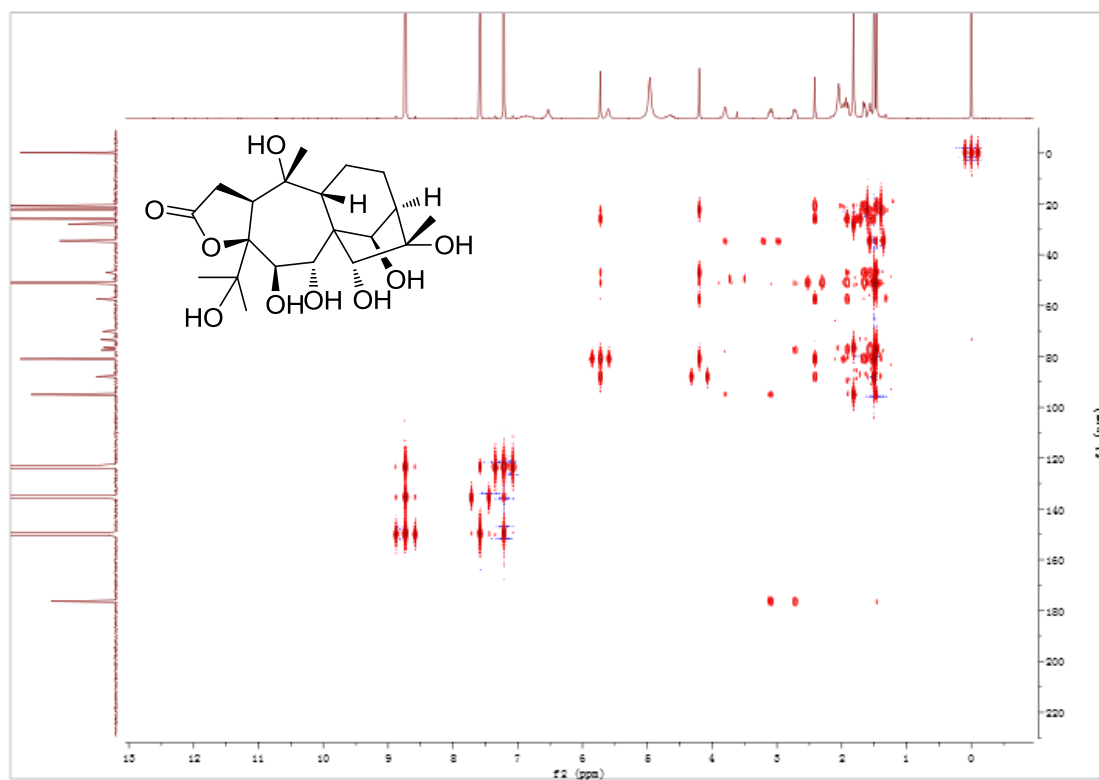

**Figure S150.** HMBC spectrum of **16** (600 MHz, in  $C_5D_5N$ )

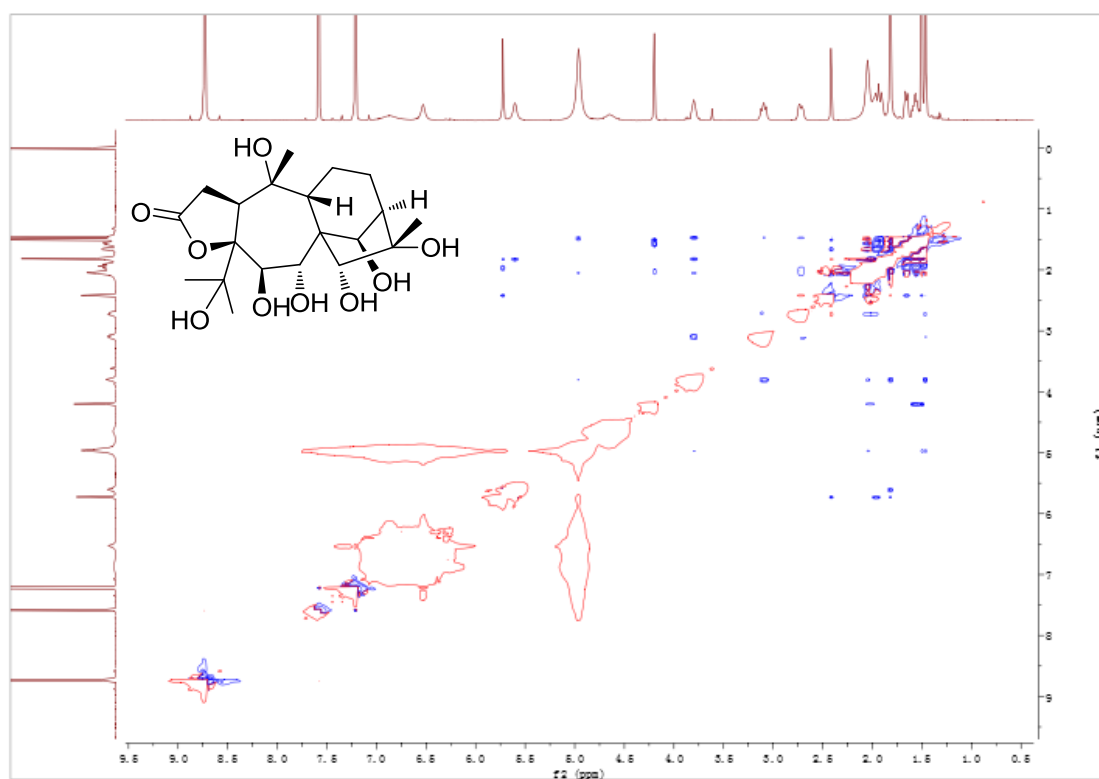

**Figure S151.** NOESY spectrum of **16** (600 MHz, in  $C_5D_5N$ )

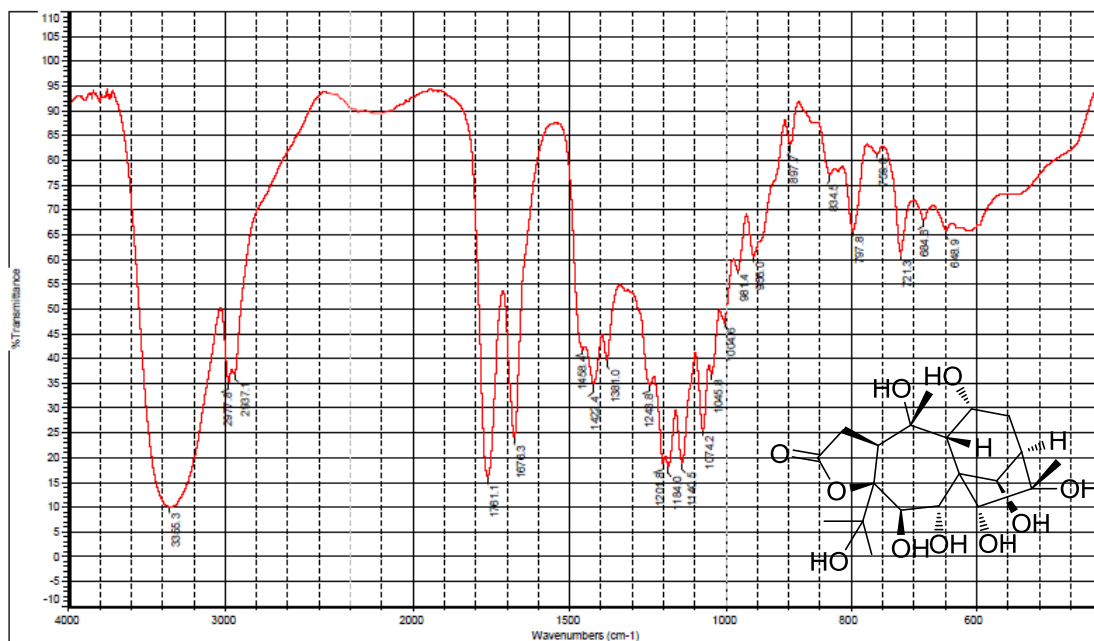

Figure S152. IR spectrum of 17

MS Formula Results: + Scan (2.928 min) Sub (2016111703.d)

| m/z      | Ion                | Formula     | Abundance |
|----------|--------------------|-------------|-----------|
| 433.2065 | (M+H) <sup>+</sup> | C29 H33 O10 | 281379.6  |

  

| Best | Formula (M)   | Ion Formula   | Score | Cross Sco | Mass     | Calc. Mass | Calc. m/z | Diff (ppm) | Abs Diff (ppm) | Mass Match | Abund Match | Spacing Match | DBE |
|------|---------------|---------------|-------|-----------|----------|------------|-----------|------------|----------------|------------|-------------|---------------|-----|
| ✓    | C20 H32 O10   | C20 H33 O10   | 99.95 |           | 432.1992 | 432.1995   | 433.2058  | 0.72       | 0.72           | 99.98      | 99.85       | 100           | 5   |
| ✓    | C24 H32 O5 G  | C24 H33 O5 G  | 98.3  |           | 432.1992 | 432.197    | 433.2043  | 6.07       | 6.07           | 99.14      | 96.88       | 99.76         | 6   |
| ✓    | C21 H36 O5 S2 | C21 H37 O5 S2 | 97.43 |           | 432.1992 | 432.2004   | 433.2077  | 2.72       | 2.72           | 99.75      | 91.86       | 99.46         | 4   |
| ✓    | C25 H36 S3    | C25 H37 S3    | 94.73 |           | 432.1992 | 432.1979   | 433.2052  | -3.07      | 3.07           | 99.69      | 82.63       | 99.35         | 9   |

Figure S153. (+)-HRESIMS data of 17

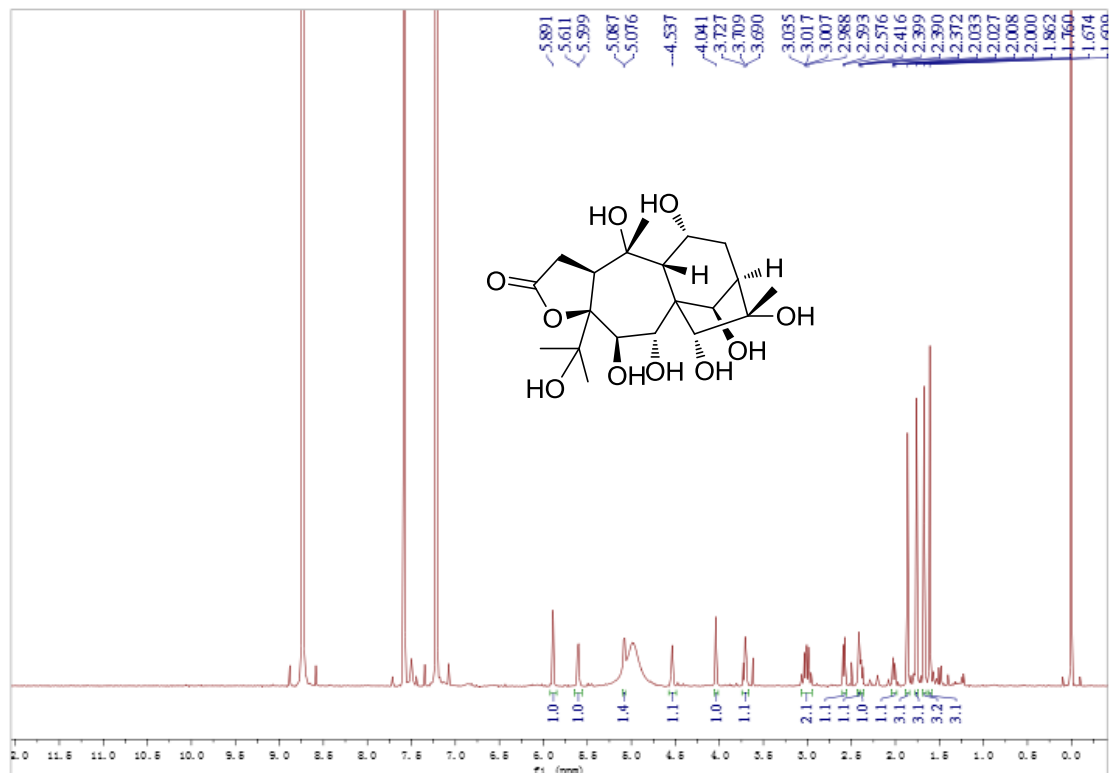

Figure S154. <sup>1</sup>H NMR spectrum of 17 (600 MHz, in C<sub>5</sub>D<sub>5</sub>N)

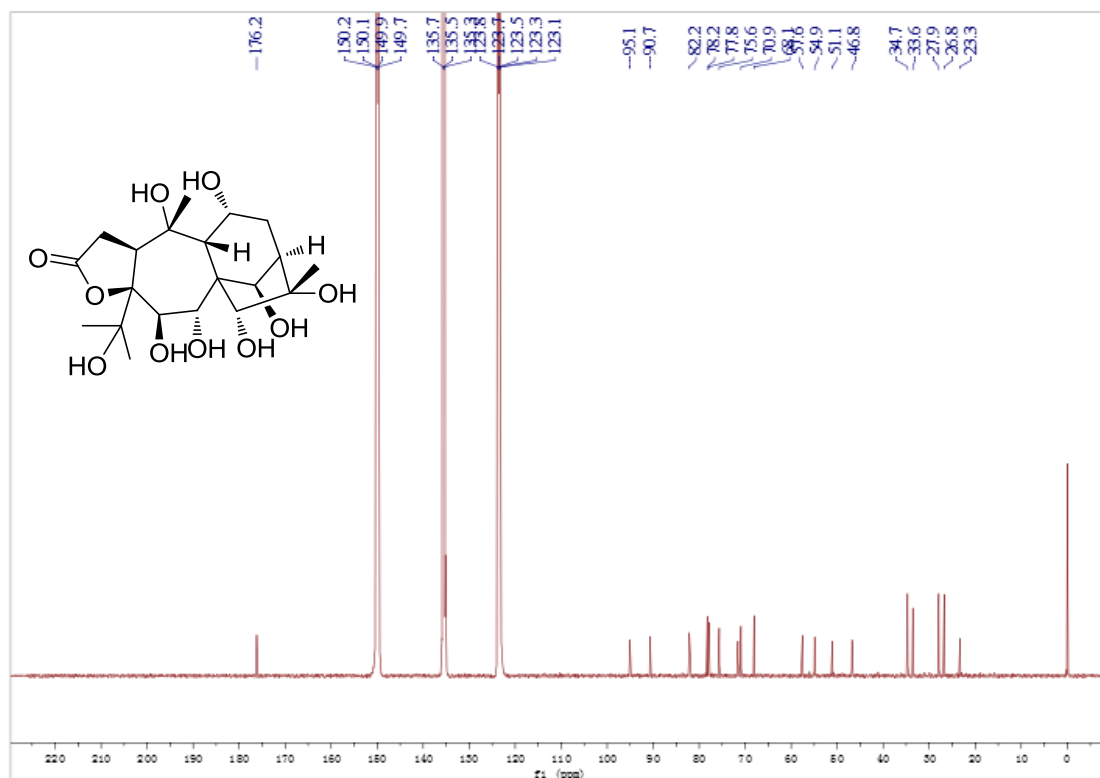

**Figure S155.**  $^{13}\text{C}$  NMR spectrum of **17** (150 MHz, in  $\text{C}_5\text{D}_5\text{N}$ )

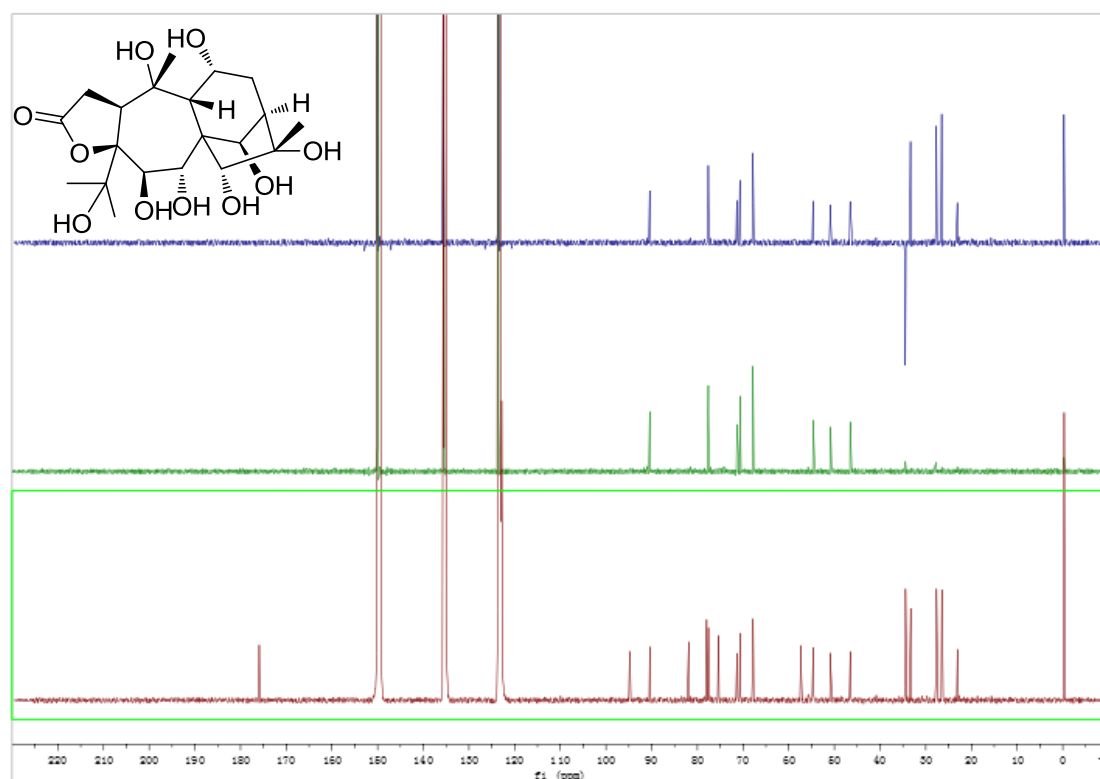

**Figure S156.** DEPT spectrum of **17** (150 MHz, in  $\text{C}_5\text{D}_5\text{N}$ )

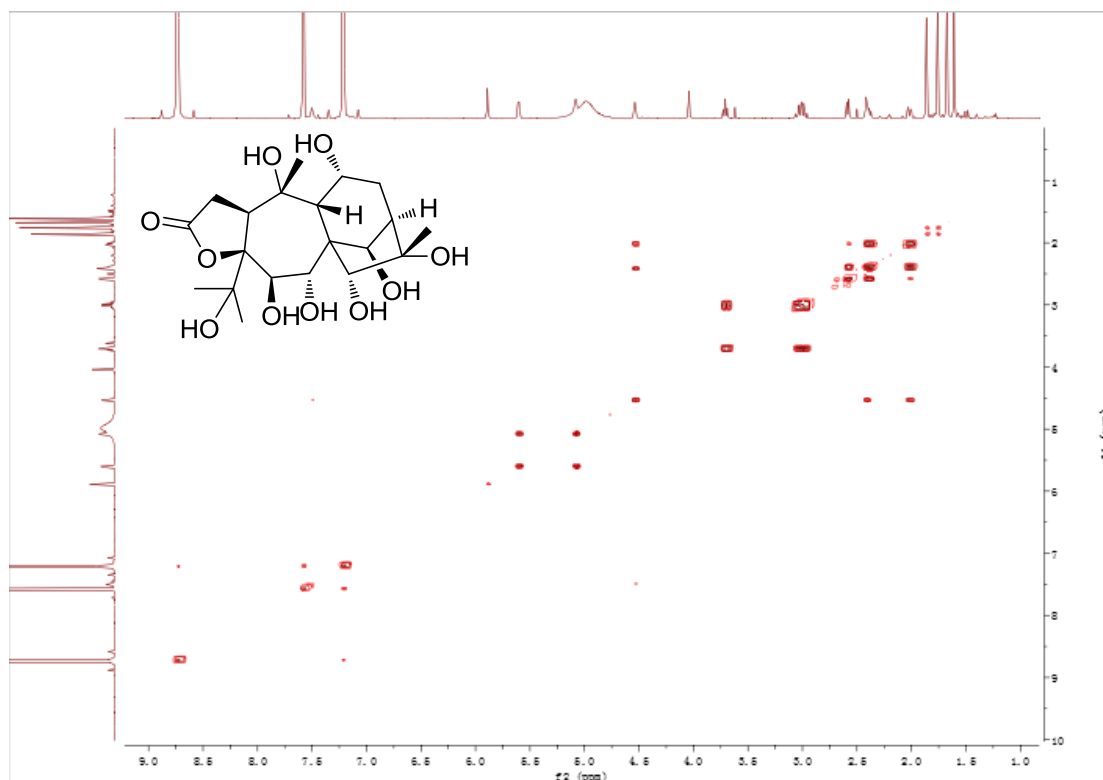

**Figure S157.**  $^1\text{H}$ - $^1\text{H}$  COSY spectrum of **17** (600 MHz, in  $\text{C}_5\text{D}_5\text{N}$ )

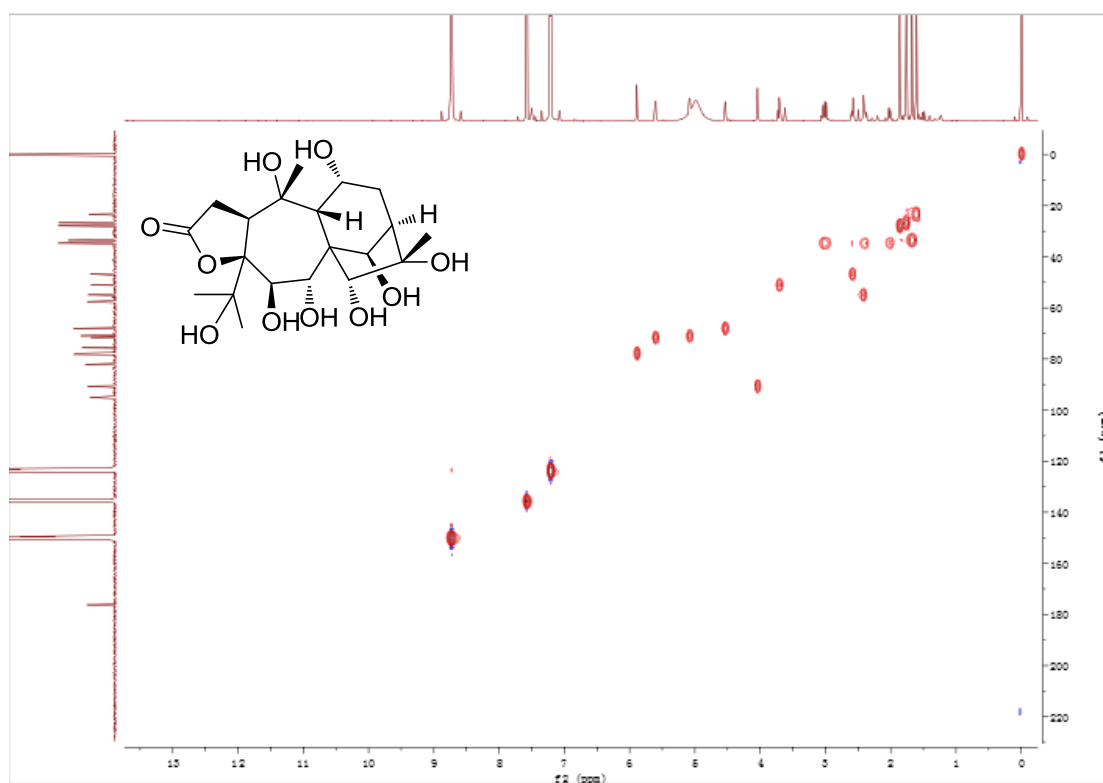

**Figure S158.** HSQC spectrum of **17** (600 MHz, in  $\text{C}_5\text{D}_5\text{N}$ )



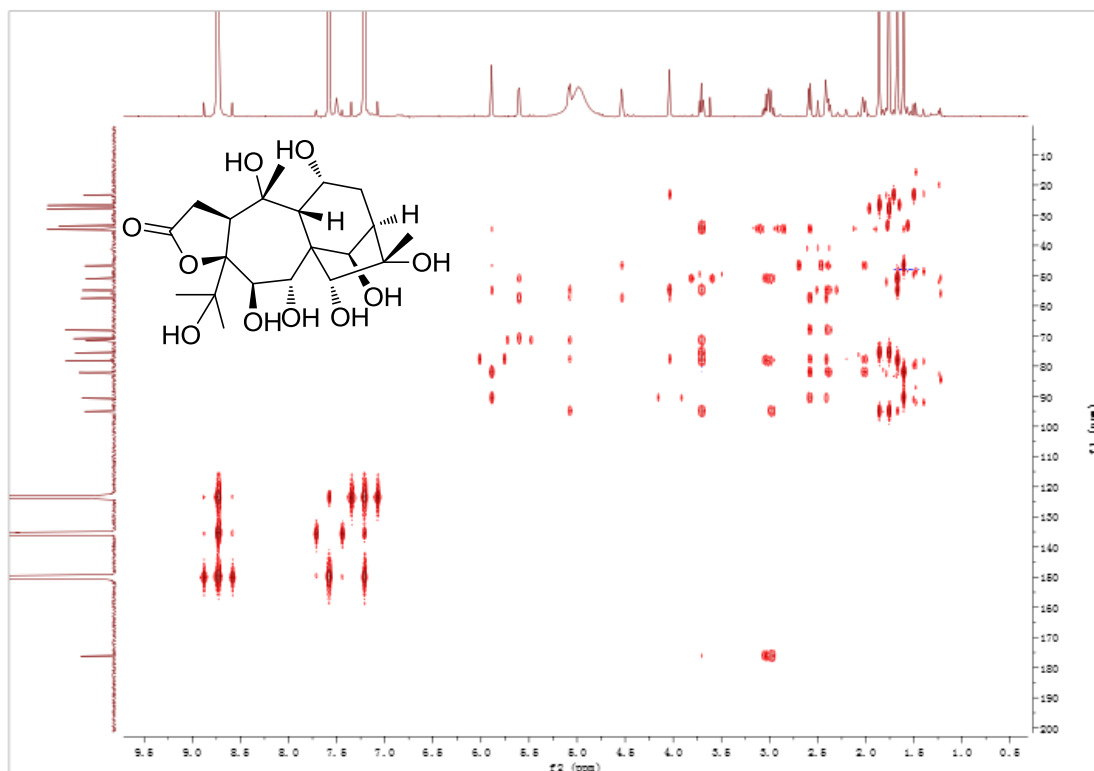

**Figure S159.** HMBC spectrum of **17** (600 MHz, in  $C_5D_5N$ )

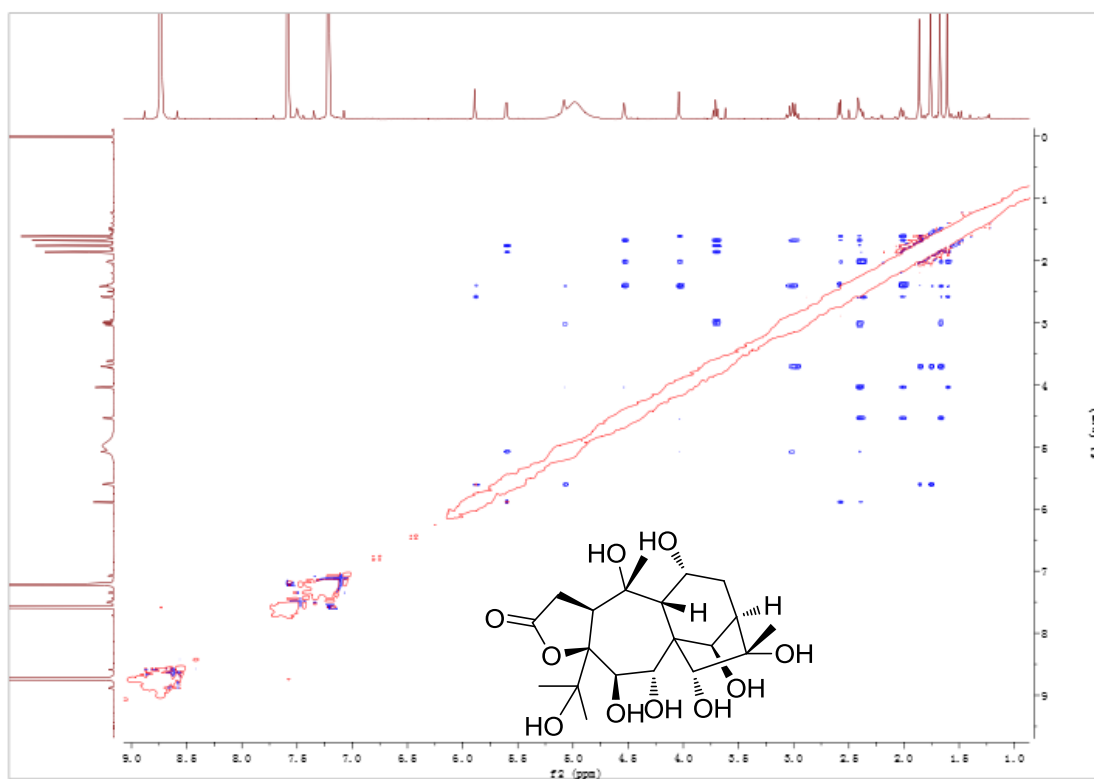

**Figure S160.** NOESY spectrum of **17** (600 MHz, in  $C_5D_5N$ )
